# Supplementary material for: Regio- and stereoselective C–H alkenylation of pyridines with silyl-substituted internal alkynes using a half-sandwich scandium catalyst
Source: Royal Society of Chemistry journal article supplement (doi:10.1039/d5cc03275j), 2025-01-01

## ***Supporting Information***

### **Regio- and stereoselective C–H alkenylation of pyridines with silyl-substituted alkynes by half-sandwich scandium catalyst**

Wei Zhou,<sup>a</sup> Shuya Wang,<sup>b</sup> Masayoshi Nishiura,<sup>a,c</sup> Xuefeng Cong<sup>\*,b</sup>, Zhaomin Hou <sup>\*,a,c</sup>

<sup>a</sup>*Advanced Catalysis Research Group, RIKEN Center for Sustainable Resource Science, Wako, Saitama, Japan.*

<sup>b</sup>*Institute of Molecular Plus, Haihe Laboratory of Sustainable Chemical Transformations, Tianjin University, Tianjin, China.*

<sup>c</sup>*Organometallic Chemistry Laboratory, RIKEN Cluster for Pioneering Research, Wako, Saitama, Japan.*

E-mail: xuefengcong@tju.edu.cn; houz@riken.jp

## **Table of Contents**

|                                                                                                              |           |
|--------------------------------------------------------------------------------------------------------------|-----------|
| <b>I. General information.....</b>                                                                           | <b>2</b>  |
| <b>II. General procedure for the Sc-catalyzed alkenylation of pyridines with<br/>silylated alkynes .....</b> | <b>2</b>  |
| <b>III. Analytic data for synthesized compounds.....</b>                                                     | <b>3</b>  |
| <b>IV NMR spectra .....</b>                                                                                  | <b>24</b> |

## I. General information

All manipulations of air- and moisture-sensitive compounds were performed under dry nitrogen atmosphere in an mBRAUN Labmaster glovebox. Nitrogen was purified by being passed through a dry column (4 Å molecular sieves, Nikka Seiko Co.) and a Gasclean GC-XR column (Nikka Seiko Co.). The nitrogen in the glovebox was constantly circulated through a copper/molecular sieves catalyst unit. The oxygen and moisture concentrations in the glovebox atmosphere were monitored by an O<sub>2</sub>/H<sub>2</sub>O Combi-Analyzer (Mbraun) to ensure both were always below 0.1 ppm. Solvents (THF, Hexane and Toluene) (dehydrated, stabilizer-free) were obtained from Kanto Kagaku Co., purified by an mBRAUN SPS-800 solvent purification system, and dried over fresh Na chips in a glovebox. The commercially available alkynes and pyridines were obtained from Tokyo Chemical Industry Co., Ltd., dried with CaH<sub>2</sub> before use. Other silylated alkynes were prepared from corresponding literatures.<sup>1</sup> Half-sandwich complexes **Sc-1**~**Sc-4**, **Y-4** and **Lu-4** were also prepared according to the literature procedure.<sup>2</sup> Silica gel column chromatography was performed with Silica Gel 60 N (spherical, neutral, 40-50 µm) obtained from Kanato Chemical Co. All <sup>1</sup>H NMR and <sup>13</sup>C NMR spectra of organic products were recorded on Bruker AVANCE III HD 500 NMR (500 MHz) instrument. The <sup>1</sup>H NMR Chemical shifts are reported in ppm with the internal TMS signal at 0.0 ppm as standard. The <sup>13</sup>C NMR chemical shifts were given using CDCl<sub>3</sub> (77.16 ppm) as the internal standard. The data are reported as follows: chemical shift (δ ppm), multiplicity (s = singlet, d = doublet, t = triplet, q = quartet, m = multiplet, dd = doublet of doublets, coupling constant(s) in Hz, integration). High Resolution Mass Spectra were obtained on a Bruker microTOF-Q III (ESI<sup>+</sup>).

## II. General procedure for the Sc-catalyzed alkenylation of pyridines with silylated alkynes

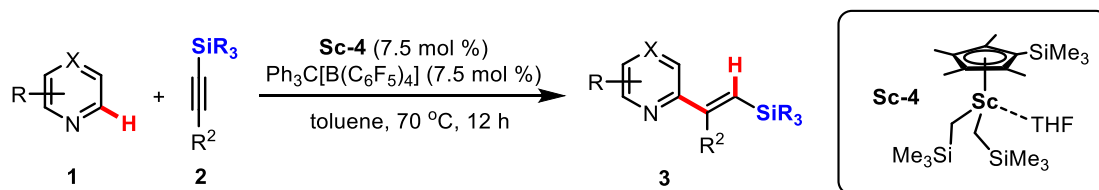

In a glovebox,  $[\text{Ph}_3\text{C}][\text{B}(\text{C}_6\text{F}_5)_4]$  (13.8 mg, 0.015 mmol in 0.5 mL toluene) was added to a stirred toluene solution (1.5 mL) of **Sc-4** (7.2 mg, 0.015 mmol) in a Schlenk tube. After 10 min, to this tube was added pyridines **1** (0.2 mmol) and alkynes **2** (0.4 mmol). After that, the tube was sealed, taken outside, and stirred at 70 °C for 12 h. Then, the mixture was concentrated and purified by silica gel column chromatography (hexane/ethyl acetate = 4:1) to obtain the desired product **3**. The E/Z ratio (>19:1) and regioisomeric ratio (r.r.) (>19:1) were determined by NMR analysis of the crude reaction mixture.

### III. Analytic data for synthesized compounds

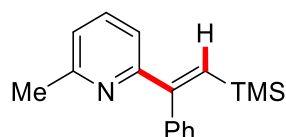

#### (*E*)-2-Methyl-6-(1-phenyl-2-(trimethylsilyl)vinyl)pyridine (**3a**)

The title compound was prepared according to the general procedure as a white solid (52.5 mg, 98% yield).  $^1\text{H}$  NMR (500 MHz,  $\text{CDCl}_3$ ):  $\delta$  7.40–7.33 (m, 4H), 7.27 (s, 1H), 7.27–7.23 (m, 2H), 6.99 (d,  $J$  = 7.5 Hz, 1H), 6.67 (d,  $J$  = 8.0 Hz, 1H), 2.61 (s, 3H), -0.11 (s, 9H);  $^{13}\text{C}$  NMR (125 MHz,  $\text{CDCl}_3$ ):  $\delta$  157.91, 157.03, 155.26, 141.56, 136.48, 132.68, 129.80, 127.98, 127.32, 121.86, 119.37, 24.82, -0.16; HRMS (ESI)  $m/z$  calcd. for  $\text{C}_{17}\text{H}_{22}\text{NSi} [\text{M}+\text{H}]^+ = 268.1516$ , found = 268.1518.

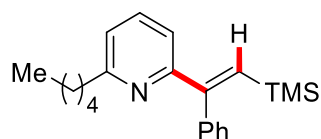

#### (*E*)-2-Butyl-6-(1-phenyl-2-(trimethylsilyl)vinyl)pyridine (**3b**)

The title compound was prepared according to the general procedure as a white solid (55.6 mg, 86% yield).  $^1\text{H}$  NMR (500 MHz,  $\text{CDCl}_3$ ):  $\delta$  7.41–7.34 (m, 4H), 7.26–7.24 (m, 3H), 6.99 (d,  $J$  = 7.5 Hz, 1H), 6.67 (d,  $J$  = 7.5 Hz, 1H), 2.84 (t,  $J$  = 7.5 Hz, 2H), 1.82–1.76 (m, 2H), 1.40–1.38 (m, 4H), 0.92 (d,  $J$  = 7.0 Hz, 3H), -0.11 (s, 9H);  $^{13}\text{C}$  NMR (125 MHz,  $\text{CDCl}_3$ ):  $\delta$  161.93, 156.96, 155.39, 141.67, 136.38, 132.62, 129.82,

127.95, 127.28, 121.18, 119.46, 38.49, 31.67, 29.29, 22.56, 14.05, -0.14; HRMS (ESI)  $m/z$  calcd. for  $C_{21}H_{30}NSi$   $[M+H]^+ = 324.2142$ , found = 324.2147.

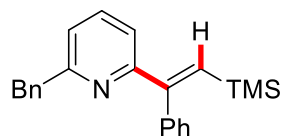

**(E)-2-Benzyl-6-(1-phenyl-2-(trimethylsilyl)vinyl)pyridine (3c)**

The title compound was prepared according to the general procedure as a white solid (66.4 mg, 94% yield)  $^1H$  NMR (500 MHz,  $CDCl_3$ ):  $\delta$  7.38–7.34 (m, 4H), 7.32–7.30 (m, 5H), 7.25–7.21 (m, 3H), 6.89 (d,  $J = 7.5$  Hz, 1H), 6.70 (d,  $J = 8.0$  Hz, 1H), 4.22 (s, 3H), -0.10 (s, 9H);  $^{13}C$  NMR (125 MHz,  $CDCl_3$ ):  $\delta$  160.40, 157.08, 155.21, 141.54, 139.62, 136.71, 133.03, 129.81, 129.35, 128.47, 127.98, 127.33, 126.28, 121.47, 119.71, 44.94, -0.15; HRMS (ESI)  $m/z$  calcd. for  $C_{23}H_{26}NSi$   $[M+H]^+ = 344.1829$ , found = 344.1832.

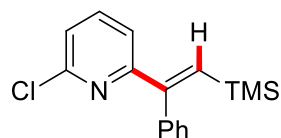

**(E)-2-Chloro-6-(1-phenyl-2-(trimethylsilyl)vinyl)pyridine (3d)**

The title compound was prepared according to the general procedure as a white solid (54.0 mg, 94% yield).  $^1H$  NMR (500 MHz,  $CDCl_3$ ):  $\delta$  7.47–7.44 (m, 1H), 7.41–7.36 (m, 3H), 7.32 (s, 1H), 7.23–7.21 (m, 2H), 7.15 (d,  $J = 7.5$  Hz, 1H), 6.77 (d,  $J = 7.5$  Hz, 1H), -0.1 (s, 9H);  $^{13}C$  NMR (125 MHz,  $CDCl_3$ ):  $\delta$  158.45, 153.14, 151.02, 140.64, 138.95, 135.16, 129.72, 128.19, 127.63, 122.55, 120.49, -0.31; HRMS (ESI)  $m/z$  calcd. for  $C_{16}H_{19}ClNSi$   $[M+H]^+ = 288.0970$ , found = 288.0968.

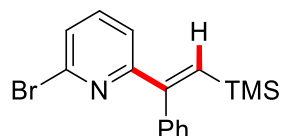

**(E)-2-Bromo-6-(1-phenyl-2-(trimethylsilyl)vinyl)pyridine (3e)**

The title compound was prepared according to the general procedure as a white solid (60.2 mg, 91% yield).  $^1H$  NMR (500 MHz,  $CDCl_3$ ):  $\delta$  7.40–7.35 (m, 3H), 7.34–7.29 (m, 3H), 7.22–7.20 (m, 2H), 6.79 (d,  $J = 7.5$  Hz, 1H), -0.12 (s, 9H);  $^{13}C$  NMR (125 MHz,  $CDCl_3$ ):  $\delta$  159.00, 153.01, 141.93, 140.55, 138.64, 135.31, 129.71, 128.20,

127.64, 126.31, 120.81, -0.31; HRMS (ESI)  $m/z$  calcd. for  $C_{16}H_{19}BrNSi$   $[M+H]^+ = 332.0465$ , found = 332.0466.

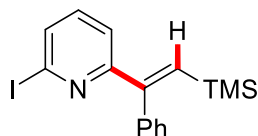

**(E)-2-Iodo-6-(1-phenyl-2-(trimethylsilyl)vinyl)pyridine (3f)**

The title compound was prepared according to the general procedure as a white solid (72.8 mg, 96% yield).  $^1H$  NMR (500 MHz,  $CDCl_3$ ):  $\delta$  7.53 (d,  $J = 8.0$  Hz, 1H), 7.40–7.36 (m, 3H), 7.30 (s, 1H), 7.22–7.20 (m, 2H), 7.12–7.09 (m, 1H), 6.79 (d,  $J = 7.5$  Hz, 1H), -0.11 (s, 9H);  $^{13}C$  NMR (125 MHz,  $CDCl_3$ ):  $\delta$  159.56, 153.09, 140.48, 137.69, 135.20, 133.09, 129.71, 128.20, 127.62, 121.17, 118.27, -0.29; HRMS (ESI)  $m/z$  calcd. for  $C_{16}H_{19}INSi$   $[M+H]^+ = 380.0326$ , found = 380.0331.

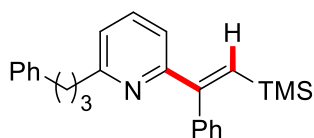

**(E)-2-(1-Phenyl-2-(trimethylsilyl)vinyl)-6-(3-phenylpropyl)pyridine (3g)**

The title compound was prepared according to the general procedure as a white solid (69.0 mg, 93% yield).  $^1H$  NMR (500 MHz,  $CDCl_3$ ):  $\delta$  7.42–7.34 (m, 4H), 7.31–7.28 (m, 3H), 7.25–7.23 (m, 4H), 7.20–7.17 (m, 1H), 6.98 (d,  $J = 7.5$  Hz, 1H), 6.70 (d,  $J = 7.5$  Hz, 1H), 2.88 (t,  $J = 7.5$  Hz, 2H), 2.72 (t,  $J = 7.5$  Hz, 2H), 2.17–2.11 (m, 2H), 0.92 (d,  $J = 7.0$  Hz, 3H), -0.10 (s, 9H);  $^{13}C$  NMR (125 MHz,  $CDCl_3$ ):  $\delta$  161.27, 157.07, 155.37, 142.37, 141.63, 136.45, 132.73, 129.81, 128.54, 128.27, 127.96, 127.30, 125.70, 121.31, 119.57, 37.81, 35.47, 31.04, -0.14; HRMS (ESI)  $m/z$  calcd. for  $C_{25}H_{30}NSi$   $[M+H]^+ = 372.2142$ , found = 372.2145.

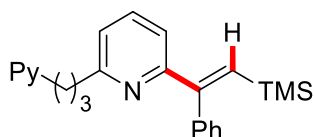

**(E)-2-(1-Phenyl-2-(trimethylsilyl)vinyl)-6-(3-(pyridin-2-yl)propyl)pyridine (3h)**

The title compound was prepared according to the general procedure as a white solid (58.8 mg, 79% yield).  $^1H$  NMR (500 MHz,  $CDCl_3$ ):  $\delta$  8.53 (d,  $J = 4.5$  Hz, 1H), 7.61–

7.57 (m, 1H), 7.42–7.34 (m, 4H), 7.27–7.23 (m, 3H), 7.19 (d,  $J = 7.5$  Hz, 1H), 7.12–7.09 (m, 1H), 7.01 (d,  $J = 8.0$  Hz, 1H), 6.70 (d,  $J = 7.5$  Hz, 1H), 2.92–2.89 (m, 4H), 2.27–2.21 (m, 2H), -0.10 (s, 9H);  $^{13}\text{C}$  NMR (125 MHz,  $\text{CDCl}_3$ ):  $\delta$  161.95, 161.13, 157.03, 155.34, 149.18, 141.61, 136.48, 136.23, 132.67, 129.79, 127.94, 127.27, 122.95, 121.34, 120.95, 119.59, 37.85, 37.80, 29.51, -0.16; HRMS (ESI)  $m/z$  calcd. for  $\text{C}_{24}\text{H}_{29}\text{N}_2\text{Si}$   $[\text{M}+\text{H}]^+ = 373.2095$ , found = 373.2091.

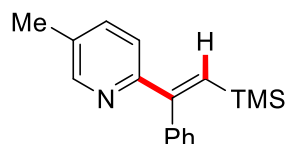

**(*E*)-5-Methyl-2-(1-phenyl-2-(trimethylsilyl)vinyl)pyridine (3i)**

The title compound was prepared according to the general procedure as a white solid (44.9 mg, 84% yield).  $^1\text{H}$  NMR (500 MHz,  $\text{CDCl}_3$ ):  $\delta$  8.46 (s, 1H), 7.39–7.31 (m, 4H), 7.24–7.22 (m, 2H), 7.09 (s, 1H), 6.84 (d,  $J = 8.0$  Hz, 1H), 2.31 (s, 3H), -0.11 (s, 9H);  $^{13}\text{C}$  NMR (125 MHz,  $\text{CDCl}_3$ ):  $\delta$  155.63, 155.14, 149.68, 141.60, 136.73, 132.01, 131.71, 129.73, 128.00, 127.35, 121.76, 18.11, -0.20; HRMS (ESI)  $m/z$  calcd. for  $\text{C}_{17}\text{H}_{22}\text{NSi}$   $[\text{M}+\text{H}]^+ = 268.1516$ , found = 268.1518.

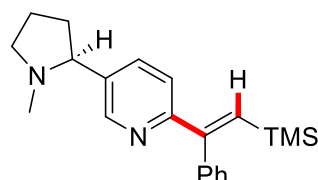

**(*S,E*)-5-(1-Methylpyrrolidin-2-yl)-2-(1-phenyl-2-(trimethylsilyl)vinyl)pyridine (3j)**

The title compound was prepared according to the general procedure as a white solid (49.7 mg, 74% yield).  $^1\text{H}$  NMR (500 MHz,  $\text{CDCl}_3$ ):  $\delta$  8.55 (s, 1H), 7.54–7.52 (m, 1H), 7.40–7.34 (m, 3H), 7.25–7.24 (m, 2H), 7.16 (s, 2H), 6.92 (d,  $J = 8.0$  Hz, 1H), 3.22 (t,  $J = 9.0$  Hz, 1H), 3.08 (t,  $J = 8.0$  Hz, 1H), 2.32–2.26 (m, 1H), 2.21–2.14 (m, 4H), 1.99–1.90 (m, 1H), 1.84–1.77 (m, 1H), 1.74–1.66 (m, 1H), -0.11 (s, 9H);  $^{13}\text{C}$  NMR (125 MHz,  $\text{CDCl}_3$ ):  $\delta$  157.14, 155.08, 149.05, 141.48, 137.23, 135.16, 132.65, 129.73, 128.03, 127.39, 122.14, 68.65, 56.97, 40.31, 35.11, 22.51, -0.23; HRMS (ESI)  $m/z$  calcd. for  $\text{C}_{21}\text{H}_{29}\text{N}_2\text{Si}$   $[\text{M}+\text{H}]^+ = 337.2095$ , found = 337.2032.

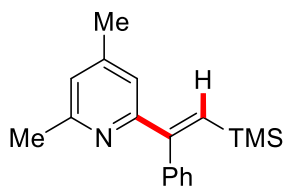

**(E)-2,4-Dimethyl-6-(1-phenyl-2-(trimethylsilyl)vinyl)pyridine (3k)**

The title compound was prepared according to the general procedure as a white solid (50.6 mg, 90% yield).  $^1\text{H}$  NMR (500 MHz,  $\text{CDCl}_3$ ):  $\delta$  7.39–7.33 (m, 3H), 7.26–7.22 (m, 3H), 6.84 (s, 1H), 6.50 (s, 1H), 2.56 (s, 3H), 2.15 (s, 3H), -0.11 (s, 9H);  $^{13}\text{C}$  NMR (125 MHz,  $\text{CDCl}_3$ ):  $\delta$  157.68, 157.11, 155.41, 147.42, 141.67, 132.67, 129.80, 127.93, 127.26, 122.84, 120.48, 24.57, 20.88, -0.16; HRMS (ESI)  $m/z$  calcd. for  $\text{C}_{18}\text{H}_{24}\text{NSi}$   $[\text{M}+\text{H}]^+ = 282.1673$ , found = 282.1677.

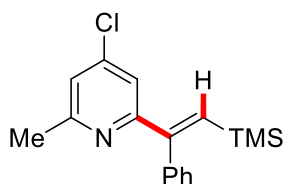

**(E)-4-Chloro-2-methyl-6-(1-phenyl-2-(trimethylsilyl)vinyl)pyridine (3l)**

The title compound was prepared according to the general procedure as a white solid (57.2 mg, 95% yield).  $^1\text{H}$  NMR (500 MHz,  $\text{CDCl}_3$ ):  $\delta$  7.41–7.37 (m, 3H), 7.29 (s, 1H), 7.23–7.21 (m, 2H), 7.03 (s, 1H), 6.68 (s, 1H), 2.58 (s, 3H), -0.11 (s, 9H);  $^{13}\text{C}$  NMR (125 MHz,  $\text{CDCl}_3$ ):  $\delta$  159.22, 158.67, 154.10, 144.38, 140.72, 134.75, 129.73, 128.19, 127.64, 121.78, 119.64, 24.60, -0.27; HRMS (ESI)  $m/z$  calcd. for  $\text{C}_{17}\text{H}_{21}\text{NClSi}$   $[\text{M}+\text{H}]^+ = 302.1126$ , found = 302.1128.

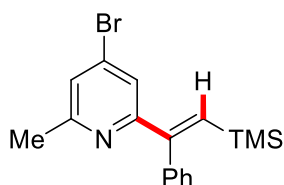

**(E)-4-Bromo-2-methyl-6-(1-phenyl-2-(trimethylsilyl)vinyl)pyridine (3m)**

The title compound was prepared according to the general procedure as a white solid (66.2 mg, 96% yield).  $^1\text{H}$  NMR (500 MHz,  $\text{CDCl}_3$ ):  $\delta$  7.41–7.37 (m, 3H), 7.27 (s, 1H), 7.23–7.20 (m, 3H), 6.84 (s, 1H), 2.58 (s, 3H), -0.11 (s, 9H);  $^{13}\text{C}$  NMR (125 MHz,  $\text{CDCl}_3$ ):  $\delta$  159.11, 158.54, 154.02, 140.68, 134.88, 133.28, 129.72, 128.19, 127.65,

124.80, 122.53, 24.51, -0.27; HRMS (ESI)  $m/z$  calcd. for  $C_{17}H_{21}NBrSi$   $[M+H]^+ = 346.0621$ , found = 346.0625.

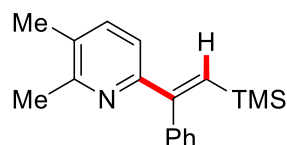

**(E)-2,3-Dimethyl-6-(1-phenyl-2-(trimethylsilyl)vinyl)pyridine (3n)**

The title compound was prepared according to the general procedure as a white solid (48.9 mg, 87% yield).  $^1H$  NMR (500 MHz,  $CDCl_3$ ):  $\delta$  7.32–7.38 (m, 3H), 7.25–7.19 (m, 4H), 6.60 (d,  $J = 8.0$  Hz, 1H), 2.56 (s, 3H), 2.24 (s, 3H), -0.11 (s, 9H);  $^{13}C$  NMR (125 MHz,  $CDCl_3$ ):  $\delta$  156.60, 155.22, 154.63, 141.71, 137.22, 131.32, 130.18, 129.79, 127.91, 127.22, 119.87, 23.07, 18.84, -0.13; HRMS (ESI)  $m/z$  calcd. for  $C_{18}H_{24}NSi$   $[M+H]^+ = 282.1673$ , found = 282.1677.

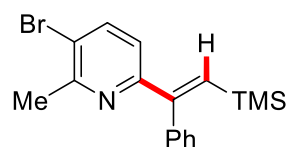

**(E)-3-Bromo-2-methyl-6-(1-phenyl-2-(trimethylsilyl)vinyl)pyridine (3o)**

The title compound was prepared according to the general procedure as a white solid (55.2 mg, 80% yield).  $^1H$  NMR (500 MHz,  $CDCl_3$ ):  $\delta$  7.59 (d,  $J = 8.0$  Hz, 1H), 7.39–7.35 (m, 3H), 7.25 (s, 1H), 7.22–7.21 (m, 2H), 6.57 (d,  $J = 8.0$  Hz, 1H), 2.71 (s, 3H), -0.11 (s, 9H);  $^{13}C$  NMR (125 MHz,  $CDCl_3$ ):  $\delta$  156.51, 155.87, 154.18, 141.05, 139.86, 133.70, 129.70, 128.11, 127.53, 121.02, 120.13, 25.31, -0.26; HRMS (ESI)  $m/z$  calcd. for  $C_{17}H_{21}NBrSi$   $[M+H]^+ = 346.0621$ , found = 346.0625.

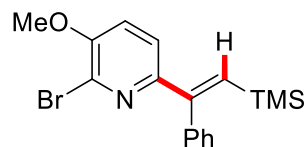

**(E)-2-Bromo-3-methoxy-6-(1-phenyl-2-(trimethylsilyl)vinyl)pyridine (3p)**

The title compound was prepared according to the general procedure as a white solid (57.8 mg, 80% yield).  $^1H$  NMR (500 MHz,  $CDCl_3$ ):  $\delta$  7.39–7.34 (m, 3H), 7.21–7.20 (m, 1H), 7.14 (s, 1H), 6.91 (d,  $J = 8.5$  Hz, 1H), 6.74 (d,  $J = 7.5$  Hz, 1H), 3.86 (s, 3H), -0.13 (s, 9H);  $^{13}C$  NMR (125 MHz,  $CDCl_3$ ):  $\delta$  152.59, 151.61, 150.72, 140.99, 132.40,

132.25, 129.69, 128.12, 127.50, 121.86, 118.23, 56.27, -0.22; HRMS (ESI)  $m/z$  calcd. for  $C_{17}H_{21}NOBrSi$   $[M+H]^+ = 362.0570$ , found = 362.0571.

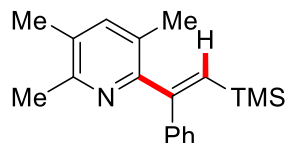

**(E)-2,3,5-Trimethyl-6-(1-phenyl-2-(trimethylsilyl)vinyl)pyridine (3q)**

The title compound was prepared according to the general procedure as a white solid (41.8 mg, 72% yield).  $^1H$  NMR (500 MHz,  $CDCl_3$ ):  $\delta$  7.09–7.08 (m, 2H), 7.05–7.00 (m, 3H), 6.92 (s, 1H), 2.23 (s, 3H), 1.99 (s, 3H), 1.83 (s, 3H), -0.23 (s, 9H);  $^{13}C$  NMR (125 MHz,  $CDCl_3$ ):  $\delta$  158.64, 156.94, 153.41, 142.04, 139.58, 133.81, 129.56, 128.77, 127.64, 127.35, 127.29, 22.19, 19.02, 18.65, -0.21; HRMS (ESI)  $m/z$  calcd. for  $C_9H_{25}NSi$   $[M+H]^+ = 295.1756$ , found = 295.1758.

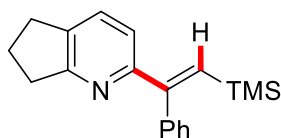

**(E)-2-(1-Phenyl-2-(trimethylsilyl)vinyl)-6,7-dihydro-5H-cyclopenta[b]pyridine (3r)**

The title compound was prepared according to the general procedure as a white solid (53.1 mg, 91% yield).  $^1H$  NMR (500 MHz,  $CDCl_3$ ):  $\delta$  7.38–7.34 (m, 3H), 7.29 (d,  $J = 7.5$  Hz, 1H), 7.25–7.23 (m, 2H), 7.19 (s, 1H), 3.06 (s,  $J = 7.5$  Hz, 2H), 2.89 (s,  $J = 7.5$  Hz, 2H), 2.18–2.10 (m, 2H), -0.11 (s, 9H);  $^{13}C$  NMR (125 MHz,  $CDCl_3$ ):  $\delta$  156.59, 156.23, 155.42, 141.91, 135.79, 131.93, 131.46, 129.77, 127.94, 127.23, 120.11, 34.43, 30.42, 23.35, -0.13; HRMS (ESI)  $m/z$  calcd. for  $C_{19}H_{23}NSi$   $[M+H]^+ = 293.1600$ , found = 293.1601.

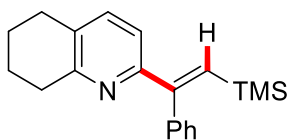

**(E)-2-(1-Phenyl-2-(trimethylsilyl)vinyl)-5,6,7,8-tetrahydroquinoline (3s)**

The title compound was prepared according to the general procedure as a white solid (54.9 mg, 94% yield).  $^1H$  NMR (500 MHz,  $CDCl_3$ ):  $\delta$  7.38–7.33 (m, 3H), 7.24–7.23

(m, 2H), 7.17–7.16 (m, 2H), 6.61 (d,  $J = 8.0$  Hz, 1H), 2.98 (t,  $J = 6.5$  Hz, 2H), 2.73 (t,  $J = 6.5$  Hz, 2H), 1.93–1.88 (m, 2H), 1.83–1.78 (m, 2H), -0.11 (s, 9H);  $^{13}\text{C}$  NMR (125 MHz,  $\text{CDCl}_3$ ):  $\delta$  156.91, 155.32, 154.93, 141.74, 136.89, 131.63, 131.13, 129.80, 127.93, 127.24, 119.73, 32.97, 28.53, 23.18, 22.79, -0.12; HRMS (ESI)  $m/z$  calcd. for  $\text{C}_{20}\text{H}_{25}\text{NSi}$   $[\text{M}+\text{H}]^+ = 293.1600$ , found = 293.1601.

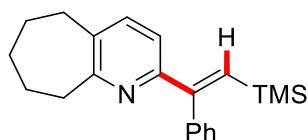

**(*E*)-2-(1-Phenyl-2-(trimethylsilyl)vinyl)-6,7,8,9-tetrahydro-5H-cyclohepta[b]pyridine (3t)**

The title compound was prepared according to the general procedure as a white solid (59.0 mg, 92% yield).  $^1\text{H}$  NMR (500 MHz,  $\text{CDCl}_3$ ):  $\delta$  7.38–7.32 (m, 3H), 7.25–7.24 (m, 3H), 7.17 (d,  $J = 8.0$  Hz, 1H), 6.56 (d,  $J = 8.0$  Hz, 1H), 3.11 (t,  $J = 5.0$  Hz, 2H), 2.73 (t,  $J = 4.0$  Hz, 2H), 1.89–1.85 (m, 2H), 1.75–1.73 (m, 2H), 1.65–1.64 (m, 2H), -0.12 (s, 9H);  $^{13}\text{C}$  NMR (125 MHz,  $\text{CDCl}_3$ ):  $\delta$  162.73, 155.25, 154.25, 141.75, 136.92, 136.68, 131.42, 129.81, 127.91, 127.21, 119.79, 39.86, 35.02, 32.54, 28.12, 26.73, -0.11; HRMS (ESI)  $m/z$  calcd. for  $\text{C}_{21}\text{H}_{27}\text{NSi}$   $[\text{M}+\text{H}]^+ = 321.1913$ , found = 321.1914.

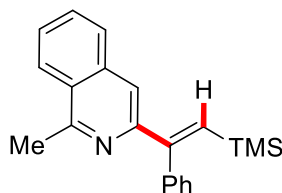

**(*E*)-1-Methyl-3-(1-phenyl-2-(trimethylsilyl)vinyl)isoquinoline (3u)**

The title compound was prepared according to the general procedure as a white solid (56.2 mg, 89% yield).  $^1\text{H}$  NMR (500 MHz,  $\text{CDCl}_3$ ):  $\delta$  8.08 (d,  $J = 8.0$  Hz, 1H), 7.59–7.50 (m, 4H), 7.46–7.40 (m, 3H), 7.34–7.32 (m, 2H), 7.02 (s, 1H), 3.04 (s, 3H), -0.06 (s, 9H);  $^{13}\text{C}$  NMR (125 MHz,  $\text{CDCl}_3$ ):  $\delta$  158.15, 155.20, 149.99, 141.67, 136.39, 131.94, 129.97, 129.83, 128.00, 127.92, 127.30, 126.86, 126.64, 125.52, 117.64, 22.83, -0.10; HRMS (ESI)  $m/z$  calcd. for  $\text{C}_{21}\text{H}_{23}\text{NSi}$   $[\text{M}+\text{H}]^+ = 317.1600$ , found = 317.1608.

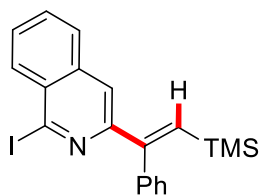

**(*E*)-1-Iodo-3-(1-phenyl-2-(trimethylsilyl)vinyl)isoquinoline (3v)**

The title compound was prepared according to the general procedure as a white solid (77.0 mg, 90% yield).  $^1\text{H}$  NMR (500 MHz,  $\text{CDCl}_3$ ):  $\delta$  8.07–8.06 (m, 1H), 7.60–7.57 (m, 2H), 7.49–7.43 (m, 5H), 7.30–7.29 (m, 2H), 7.02 (s, 1H), -0.08 (s, 9H);  $^{13}\text{C}$  NMR (125 MHz,  $\text{CDCl}_3$ ):  $\delta$  153.03, 152.44, 140.80, 136.63, 134.01, 132.84, 130.95, 130.79, 129.87, 128.63, 128.21, 127.88, 127.58, 119.04, -0.19; HRMS (ESI)  $m/z$  calcd. for  $\text{C}_{20}\text{H}_{20}\text{INSi} [\text{M}+\text{H}]^+ = 429.0410$ , found = 429.0411.

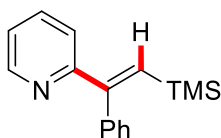

**(*E*)-2-(1-Phenyl-2-(trimethylsilyl)vinyl)pyridine (3w)**

The title compound was prepared according to the general procedure as a white solid (36.0 mg, 71% yield).  $^1\text{H}$  NMR (500 MHz,  $\text{CDCl}_3$ ):  $\delta$  8.63 (d,  $J = 4.5$  Hz, 1H), 7.54–7.51 (m, 1H), 7.40–7.36 (m, 3H), 7.26–7.23 (m, 2H), 7.17 (s, 1H), 7.15–7.12 (m, 1H), 6.95 (d,  $J = 8.0$  Hz, 1H), -0.1 (s, 9H);  $^{13}\text{C}$  NMR (125 MHz,  $\text{CDCl}_3$ ):  $\delta$  158.11, 155.18, 149.19, 141.37, 136.35, 133.33, 129.76, 128.07, 127.46, 122.23, 122.16, -2.3; HRMS (ESI)  $m/z$  calcd. for  $\text{C}_{16}\text{H}_{20}\text{NSi} [\text{M}+\text{H}]^+ = 254.0360$ , found = 254.1363.

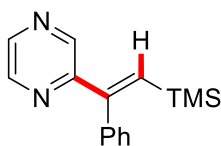

**(*E*)-2-(1-Phenyl-2-(trimethylsilyl)vinyl)pyrazine (3x)**

The title compound was prepared according to the general procedure as a white solid (27.4 mg, 54% yield).  $^1\text{H}$  NMR (500 MHz,  $\text{CDCl}_3$ ):  $\delta$  8.56 (br, 1H), 8.41 (d,  $J = 7.0$  Hz, 1H), 8.29 (s, 1H), 7.43–7.37 (m, 3H), 7.25–7.24 (m, 2H), 7.18 (s, 1H), -0.08 (s, 9H);  $^{13}\text{C}$  NMR (125 MHz,  $\text{CDCl}_3$ ):  $\delta$  153.52, 152.55, 143.70, 143.49, 142.91, 139.97, 136.54, 129.57, 128.36, 127.94, -0.35; HRMS (ESI)  $m/z$  calcd. for  $\text{C}_{15}\text{H}_{19}\text{N}_2\text{Si} [\text{M}+\text{H}]^+ = 255.1312$ , found = 255.1315.

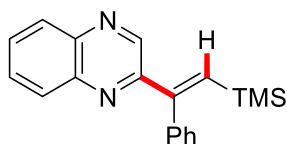

**(E)-2-(1-Phenyl-2-(trimethylsilyl)vinyl)quinoxaline (3y)**

The title compound was prepared according to the general procedure as a white solid (29.1 mg, 48% yield).  $^1\text{H}$  NMR (500 MHz,  $\text{CDCl}_3$ ):  $\delta$  8.26 (s, 1H), 8.10 (d,  $J = 8.5$  Hz, 1H), 8.04 (d,  $J = 8.0$  Hz, 1H), 7.77–7.70 (m, 2H), 7.45–7.39 (m, 3H), 7.32–7.31 (m, 3H), -0.03 (s, 9H);  $^{13}\text{C}$  NMR (125 MHz,  $\text{CDCl}_3$ ):  $\delta$  153.38, 153.03, 144.52, 141.94, 141.48, 140.11, 138.26, 130.11, 129.73, 129.69, 129.57, 128.96, 128.40, 128.02, -0.23;  $\text{C}_{19}\text{H}_{21}\text{N}_2\text{Si}$   $[\text{M}+\text{H}]^+ = 305.1469$ , found = 305.1474

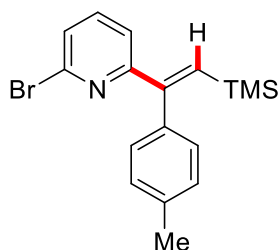

**(E)-2-Bromo-6-(1-(p-tolyl)-2-(trimethylsilyl)vinyl)pyridine (3z)**

The title compound was prepared according to the general procedure as a white solid (64.9 mg, 94% yield).  $^1\text{H}$  NMR (500 MHz,  $\text{CDCl}_3$ ):  $\delta$  7.35–7.32 (m, 1H), 7.30–7.28 (m, 2H), 7.19 (d,  $J = 7.5$  Hz, 2H), 7.09 (d,  $J = 8.0$  Hz, 2H), 6.81 (d,  $J = 7.5$  Hz, 1H), 2.40 (s, 3H), -0.10 (s, 9H);  $^{13}\text{C}$  NMR (125 MHz,  $\text{CDCl}_3$ ):  $\delta$  159.27, 153.10, 141.87, 138.59, 137.53, 137.28, 135.09, 126.22, 120.80, 21.25, -0.23; HRMS (ESI)  $m/z$  calcd. for  $\text{C}_{17}\text{H}_{21}\text{BrNSi}$   $[\text{M}+\text{H}]^+ = 346.0621$ , found = 346.0627.

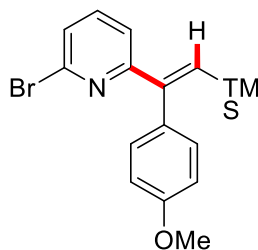

**(E)-2-Bromo-6-(1-(4-methoxyphenyl)-2-(trimethylsilyl)vinyl)pyridine (3aa)**

The title compound was prepared according to the general procedure as a white solid (65.7 mg, 91% yield).  $^1\text{H}$  NMR (500 MHz,  $\text{CDCl}_3$ ):  $\delta$  7.36–7.33 (m, 1H), 7.29 (d,  $J =$

7.5 Hz, 1H), 7.25 (s, 1H), 7.12 (d,  $J = 8.0$  Hz, 2H), 6.91 (d,  $J = 8.0$  Hz, 2H), 6.82 (d,  $J = 7.5$  Hz, 1H), 3.85 (s, 3H), -0.10 (s, 9H);  $^{13}\text{C}$  NMR (125 MHz,  $\text{CDCl}_3$ ):  $\delta$  159.47, 159.14, 152.77, 141.87, 138.60, 135.28, 132.83, 130.83, 126.23, 120.78, 113.54, 55.22, -0.21; HRMS (ESI)  $m/z$  calcd. for  $\text{C}_{17}\text{H}_{21}\text{BrNOSi}$   $[\text{M}+\text{H}]^+ = 362.0570$ , found = 362.0571.

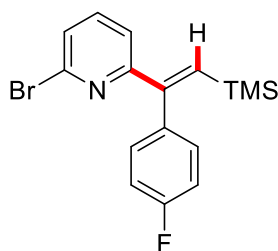

**(E)-2-Bromo-6-(1-(4-fluorophenyl)-2-(trimethylsilyl)vinyl)pyridine (3ab)**

The title compound was prepared according to the general procedure as a white solid (52.3 mg, 75% yield).  $^1\text{H}$  NMR (500 MHz,  $\text{CDCl}_3$ ):  $\delta$  7.38–7.35 (m, 1H), 7.32–7.30 (m, 2H), 7.22–7.17 (m, 2H), 7.10–7.07 (m, 2H), 6.78 (d,  $J = 7.5$  Hz, 1H), -0.10 (s, 9H);  $^{13}\text{C}$  NMR (125 MHz,  $\text{CDCl}_3$ ):  $\delta$  162.40 (d,  $J = 245.38$  Hz), 158.93, 151.99, 142.01, 138.70, 136.49 (d,  $J = 3.50$  Hz), 136.06, 131.37 (d,  $J = 8.00$  Hz), 126.46, 120.62, 115.21 (d,  $J = 21.38$  Hz), -0.28; HRMS (ESI)  $m/z$  calcd. for  $\text{C}_{16}\text{H}_{18}\text{BrFNSi}$   $[\text{M}+\text{H}]^+ = 350.0370$ , found = 350.0373.

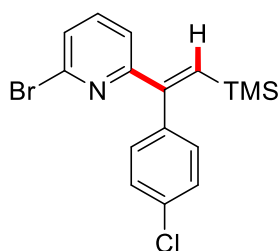

**(E)-2-Bromo-6-(1-(4-chlorophenyl)-2-(trimethylsilyl)vinyl)pyridine (3ac)**

The title compound was prepared according to the general procedure as a white solid (60.6 mg, 83% yield).  $^1\text{H}$  NMR (500 MHz,  $\text{CDCl}_3$ ):  $\delta$  7.38–7.35 (m, 3H), 7.32–7.30 (m, 2H), 7.15 (d,  $J = 8.0$  Hz, 2H), 6.77 (d,  $J = 7.5$  Hz, 1H), -0.09 (s, 9H);  $^{13}\text{C}$  NMR (125 MHz,  $\text{CDCl}_3$ ):  $\delta$  158.66, 151.84, 142.02, 139.03, 138.71, 136.14, 133.69, 131.11, 128.47, 126.52, 120.60, -0.24; HRMS (ESI)  $m/z$  calcd. for  $\text{C}_{16}\text{H}_{18}\text{BrClNSi}$   $[\text{M}+\text{H}]^+ = 366.0075$ , found = 366.0076.

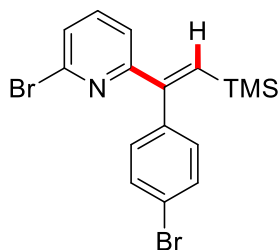

**(E)-2-Bromo-6-(1-(4-bromophenyl)-2-(trimethylsilyl)vinyl)pyridine (3ad)**

The title compound was prepared according to the general procedure as a white solid (74.3 mg, 92% yield).  $^1\text{H}$  NMR (500 MHz,  $\text{CDCl}_3$ ):  $\delta$  7.52 (d,  $J$  = 8.0 Hz, 2H), 7.38–7.35 (m, 1H), 7.32–7.29 (m, 2H), 7.09 (d,  $J$  = 8.5 Hz, 2H), 6.77 (d,  $J$  = 7.5 Hz, 1H), -0.09 (s, 9H);  $^{13}\text{C}$  NMR (125 MHz,  $\text{CDCl}_3$ ):  $\delta$  158.57, 151.83, 142.02, 139.51, 138.71, 136.12, 131.43, 126.54, 121.80, 120.60, -0.23; HRMS (ESI)  $m/z$  calcd. for  $\text{C}_{16}\text{H}_{18}\text{Br}_2\text{NSi} [\text{M}+\text{H}]^+ = 405.9571$ , found = 405.9578.

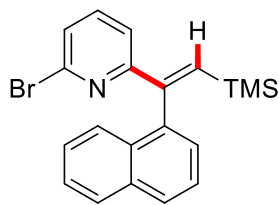

**(E)-2-Bromo-6-(1-(naphthalen-1-yl)-2-(trimethylsilyl)vinyl)pyridine (3ae)**

The title compound was prepared according to the general procedure as a white solid (68.6 mg, 90% yield).  $^1\text{H}$  NMR (500 MHz,  $\text{CDCl}_3$ ):  $\delta$  7.89–7.86 (m, 2H), 7.70–7.67 (m, 2H), 7.52–7.44 (m, 2H), 7.37–7.34 (m, 2H), 7.28–7.25 (m, 1H), 7.22–7.18 (m, 1H), 6.54 (d,  $J$  = 7.5 Hz, 1H), -0.30 (s, 9H);  $^{13}\text{C}$  NMR (125 MHz,  $\text{CDCl}_3$ ):  $\delta$  158.52, 150.93, 142.00, 138.89, 137.90, 137.06, 133.50, 132.50, 128.20, 127.67, 126.37, 126.19, 126.16, 125.99, 125.28, 120.66, -0.70; HRMS (ESI)  $m/z$  calcd. for  $\text{C}_{20}\text{H}_{21}\text{BrNSi} [\text{M}+\text{H}]^+ = 382.0621$ , found = 382.0623.

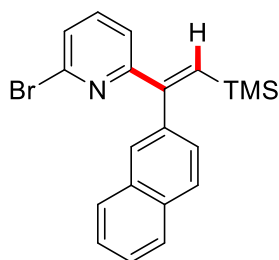

**(E)-2-Bromo-6-(1-(naphthalen-2-yl)-2-(trimethylsilyl)vinyl)pyridine (3af)**

The title compound was prepared according to the general procedure as a white solid (70.9 mg, 93% yield).  $^1\text{H}$  NMR (500 MHz,  $\text{CDCl}_3$ ):  $\delta$  7.90–7.83 (m, 3H), 7.73 (s, 1H), 7.54–7.52 (m, 2H), 7.39 (s, 1H), 7.32–7.30 (m, 3H), 6.82–6.78 (m, 1H), -0.12 (s, 9H);  $^{13}\text{C}$  NMR (125 MHz,  $\text{CDCl}_3$ ):  $\delta$  159.01, 153.06, 142.00, 138.65, 138.11, 135.88, 133.10, 132.72, 128.73, 127.92, 127.82, 127.79, 127.71, 126.40, 126.36, 126.17, 120.98, -0.18; HRMS (ESI)  $m/z$  calcd. for  $\text{C}_{20}\text{H}_{21}\text{BrNSi}$   $[\text{M}+\text{H}]^+ = 382.0621$ , found = 382.0623.

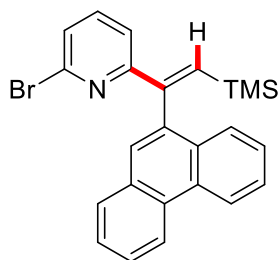

**(*E*)-2-Bromo-6-(1-(phenanthren-9-yl)-2-(trimethylsilyl)vinyl)pyridine (3ag)**

The title compound was prepared according to the general procedure as a white solid (65.5 mg, 76% yield).  $^1\text{H}$  NMR (500 MHz,  $\text{CDCl}_3$ ):  $\delta$  8.73 (d,  $J = 8.0$  Hz, 2H), 7.88 (d,  $J = 8.0$  Hz, 1H), 7.75 (d,  $J = 8.0$  Hz, 1H), 7.71–7.68 (m, 2H), 7.65–7.62 (m, 3H), 7.48–7.45 (m, 1H), 7.28–7.25 (m, 1H), 7.19–7.16 (m, 1H), 6.65 (d,  $J = 8.0$  Hz, 1H), -0.25 (s, 9H);  $^{13}\text{C}$  NMR (125 MHz,  $\text{CDCl}_3$ ):  $\delta$  158.39, 151.20, 142.04, 138.90, 137.36, 136.52, 131.48, 131.31, 130.34, 130.30, 128.63, 128.54, 127.11, 126.91, 126.75, 126.73, 126.46, 122.86, 122.66, 120.69, -0.51; HRMS (ESI)  $m/z$  calcd. for  $\text{C}_{24}\text{H}_{23}\text{BrNSi}$   $[\text{M}+\text{H}]^+ = 432.0778$ , found = 432.0780.

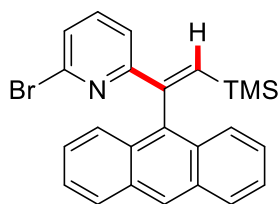

**(*E*)-2-(1-(anthracen-9-yl)-2-(trimethylsilyl)vinyl)-6-bromopyridine (3ah)**

The title compound was prepared according to the general procedure as a white solid (74.1 mg, 86% yield).  $^1\text{H}$  NMR (500 MHz,  $\text{CDCl}_3$ ):  $\delta$  8.50 (s, 1H), 8.04–8.03 (m, 3H), 7.93 (d,  $J = 8.5$  Hz, 2H), 7.47–7.44 (m, 2H), 7.39–7.36 (m, 2H), 7.28–7.26 (m, 1H), 7.13–7.10 (m, 1H), 6.30 (d,  $J = 7.5$  Hz, 1H), -0.56 (s, 9H);  $^{13}\text{C}$  NMR (125 MHz,  $\text{CDCl}_3$ ):  $\delta$  158.21, 148.37, 142.13, 139.20, 139.05, 134.44, 131.35, 130.42, 128.47, 126.96,

126.53, 125.76, 125.36, 120.54, -1.27; HRMS (ESI)  $m/z$  calcd. for  $C_{24}H_{23}BrNSi$   $[M+H]^+ = 432.0778$ , found = 432.0780.

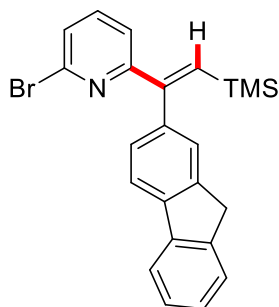

**(E)-2-(1-(9H-Fluoren-2-yl)-2-(trimethylsilyl)vinyl)-6-bromopyridine (3ai)**

The title compound was prepared according to the general procedure as a white solid (79.8 mg, 95% yield).  $^1H$  NMR (500 MHz,  $CDCl_3$ ):  $\delta$  7.83–7.79 (m, 2H), 7.56 (d,  $J$  = 7.5 Hz, 2H), 7.42–7.38 (m, 2H), 7.35–7.29 (m, 4H), 7.22 (d,  $J$  = 8.0 Hz, 1H), 6.86 (d,  $J$  = 7.5 Hz, 1H), -0.10 (s, 9H);  $^{13}C$  NMR (125 MHz,  $CDCl_3$ ):  $\delta$  159.29, 153.39, 143.36, 143.16, 141.96, 141.36, 141.17, 139.15, 138.65, 135.36, 128.42, 126.86, 126.39, 126.33, 125.10, 120.93, 119.95, 119.58, 36.92, -0.15; HRMS (ESI)  $m/z$  calcd. for  $C_{24}H_{23}BrNSi$   $[M+H]^+ = 420.0778$ , found = 432.0780.

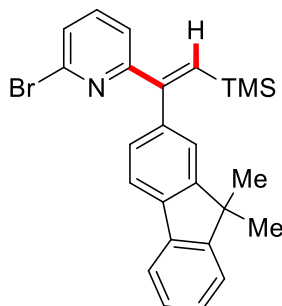

**(E)-2-Bromo-6-(1-(9,9-dimethyl-9H-fluoren-2-yl)-2-(trimethylsilyl)vinyl)pyridine (3aj)**

The title compound was prepared according to the general procedure as a white solid (86.0 mg, 96% yield).  $^1H$  NMR (500 MHz,  $CDCl_3$ ):  $\delta$  7.77–7.73 (m, 2H), 7.46 (d,  $J$  = 7.0 Hz, 1H), 7.38–7.30 (m, 6H), 7.18 (d,  $J$  = 8.0 Hz, 1H), 6.90 (d,  $J$  = 7.5 Hz, 1H), 1.51 (s, 6H), -0.09 (s, 9H);  $^{13}C$  NMR (125 MHz,  $CDCl_3$ ):  $\delta$  159.23, 153.70, 153.64, 153.49, 141.96, 139.61, 138.84, 138.69, 138.62, 135.38, 128.47, 127.37, 127.05, 126.33, 124.21, 122.66, 120.90, 120.02, 119.69, 46.86, 27.06, -0.20; HRMS (ESI)  $m/z$  calcd. for  $C_{25}H_{27}BrNSi$   $[M+H]^+ = 448.1091$ , found = 448.1094.

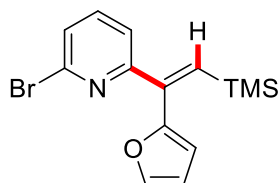

**(Z)-2-Bromo-6-(1-(furan-2-yl)-2-(trimethylsilyl)vinyl)pyridine (3ak)**

The title compound was prepared according to the general procedure as a white solid (59.2 mg, 92% yield).  $^1\text{H}$  NMR (500 MHz,  $\text{CDCl}_3$ ):  $\delta$  7.50–7.47 (m, 2H), 7.39 (d,  $J$  = 7.5 Hz, 1H), 7.26 (d,  $J$  = 7.5 Hz, 1H), 6.65 (s, 1H), 6.47–6.46 (m, 1H), 6.36 (d,  $J$  = 3.0 Hz, 1H), 0.13 (s, 9H);  $^{13}\text{C}$  NMR (125 MHz,  $\text{CDCl}_3$ ):  $\delta$  159.71, 152.83, 142.74, 141.90, 141.52, 138.67, 137.09, 126.82, 121.14, 111.48, 110.84, 0.03; HRMS (ESI)  $m/z$  calcd. for  $\text{C}_{14}\text{H}_{17}\text{BrNOSi}$   $[\text{M}+\text{H}]^+ = 322.0257$ , found = 322.0258.

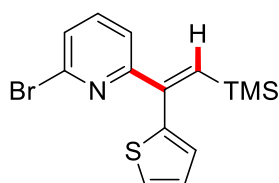

**(Z)-2-Bromo-6-(1-(thiophen-2-yl)-2-(trimethylsilyl)vinyl)pyridine (3al)**

The title compound was prepared according to the general procedure as a white solid (64.9 mg, 96% yield).  $^1\text{H}$  NMR (500 MHz,  $\text{CDCl}_3$ ):  $\delta$  7.41–7.38 (m, 1H), 7.36–7.35 (m, 2H), 7.32 (d,  $J$  = 8.0 Hz, 1H), 7.06–7.01 (m, 2H), 6.96–6.95 (m, 1H), -0.02 (s, 9H);  $^{13}\text{C}$  NMR (125 MHz,  $\text{CDCl}_3$ ):  $\delta$  159.04, 145.41, 141.72, 141.09, 139.68, 138.76, 128.22, 126.75, 126.56, 126.01, 120.56, -0.50; HRMS (ESI)  $m/z$  calcd. for  $\text{C}_{14}\text{H}_{17}\text{BrNSSi}$   $[\text{M}+\text{H}]^+ = 338.0029$ , found = 338.0030.

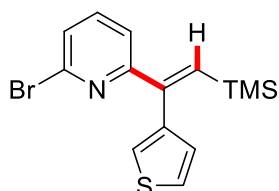

**(E)-2-Bromo-6-(1-(thiophen-3-yl)-2-(trimethylsilyl)vinyl)pyridine (3am)**

The title compound was prepared according to the general procedure as a white solid (64.2 mg, 95% yield).  $^1\text{H}$  NMR (500 MHz,  $\text{CDCl}_3$ ):  $\delta$  7.39–7.34 (m, 2H), 7.32–7.30 (m, 2H), 7.16–7.15 (m, 1H), 6.95 (d,  $J$  = 4.5 Hz, 1H), 6.87 (d,  $J$  = 7.5 Hz, 1H), -0.06 (s,

9H);  $^{13}\text{C}$  NMR (125 MHz,  $\text{CDCl}_3$ ):  $\delta$  158.77, 147.93, 141.90, 140.68, 138.74, 136.72, 129.22, 126.45, 125.50, 124.35, 120.46, -0.40; HRMS (ESI)  $m/z$  calcd. for  $\text{C}_{14}\text{H}_{17}\text{BrNSSi} [\text{M}+\text{H}]^+ = 338.0029$ , found = 338.0030.

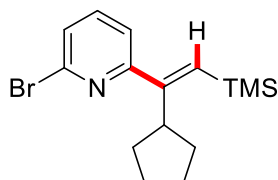

**(*E*)-2-Bromo-6-(1-cyclopentyl-2-(trimethylsilyl)vinyl)pyridine (3an)**

The title compound was prepared according to the general procedure as a white solid (59.6 mg, 92% yield).  $^1\text{H}$  NMR (500 MHz,  $\text{CDCl}_3$ ):  $\delta$  7.45–7.42 (m, 1H), 7.30–7.27 (m, 2H), 5.89 (s, 1H), 3.10–3.03 (s, 1H), 1.86–1.77 (m, 6H), 1.60–1.57 (m, 2H), 0.19 (s, 9H);  $^{13}\text{C}$  NMR (125 MHz,  $\text{CDCl}_3$ ):  $\delta$  162.74, 158.68, 140.21, 138.16, 133.25, 125.65, 121.33, 46.34, 31.95, 26.40, 0.24; HRMS (ESI)  $m/z$  calcd. for  $\text{C}_{15}\text{H}_{23}\text{BrNSi} [\text{M}+\text{H}]^+ = 324.0778$ , found = 324.0780.

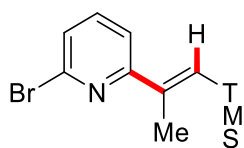

**(*E*)-2-Bromo-6-(1-(trimethylsilyl)prop-1-en-2-yl)pyridine (3ao)**

The title compound was prepared according to the general procedure as a white solid (58.4 mg, 93% yield).  $^1\text{H}$  NMR (500 MHz,  $\text{CDCl}_3$ ):  $\delta$  7.50–7.47 (m, 1H), 7.43–7.41 (m, 1H), 7.33–7.32 (m, 1H), 6.57 (s, 1H), 2.24 (s, 3H), 0.21 (s, 9H);  $^{13}\text{C}$  NMR (125 MHz,  $\text{CDCl}_3$ ):  $\delta$  161.06, 149.05, 141.31, 138.57, 132.25, 126.15, 118.33, 19.24, -0.19; HRMS (ESI)  $m/z$  calcd. for  $\text{C}_{14}\text{H}_{25}\text{BrNSi} [\text{M}+\text{H}]^+ = 314.0934$ , found = 314.0933.

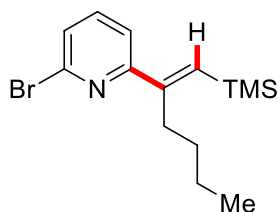

**(*E*)-2-Bromo-6-(1-(trimethylsilyl)hex-1-en-2-yl)pyridine (3ap)**

The title compound was prepared according to the general procedure as a white solid (54.3 mg, 87% yield). <sup>1</sup>H NMR (500 MHz, CDCl<sub>3</sub>): δ 7.49–7.46 (m, 1H), 7.37 (d, *J* = 7.5 Hz, 1H), 7.31 (d, *J* = 7.5 Hz, 1H), 6.32 (s, 1H), 2.69–2.66 (m, 2H), 1.36–1.35 (m, 4H), 0.90 (t, *J* = 6.5 Hz, 3H), 0.20 (s, 9H); <sup>13</sup>C NMR (125 MHz, CDCl<sub>3</sub>): δ 161.18, 155.06, 141.31, 138.54, 132.25, 126.04, 119.21, 33.04, 31.75, 22.94, 13.97, 0.11; HRMS (ESI) *m/z* calcd. for C<sub>14</sub>H<sub>23</sub>BrNSi [M+H]<sup>+</sup> = 312.0778, found = 312.0782.

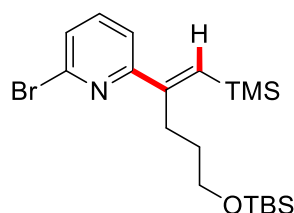

**(*E*)-2-Bromo-6-(5-((tert-butyldimethylsilyl)oxy)-1-(trimethylsilyl)pent-1-en-2-yl)pyridine (3aq)**

The title compound was prepared according to the general procedure as a white solid (77.0 mg, 90% yield). <sup>1</sup>H NMR (500 MHz, CDCl<sub>3</sub>): δ 7.48–7.45 (m, 1H), 7.42 (d, *J* = 7.5 Hz, 1H), 7.31 (d, *J* = 7.5 Hz, 1H), 6.40 (s, 1H), 3.64 (t, *J* = 6.5 Hz, 2H), 2.75–2.72 (m, 2H), 1.63–1.59 (m, 2H), 0.90 (s, 9H), 0.21 (s, 9H), 0.05 (s, 6H); <sup>13</sup>C NMR (125 MHz, CDCl<sub>3</sub>): δ 160.70, 154.26, 141.35, 138.56, 132.57, 126.12, 119.20, 63.15, 32.64, 29.78, 25.98, 18.35, 0.06, -5.32; HRMS (ESI) *m/z* calcd. for C<sub>19</sub>H<sub>35</sub>BrNSi<sub>2</sub> [M+H]<sup>+</sup> = 428.1435, found = 428.1437.

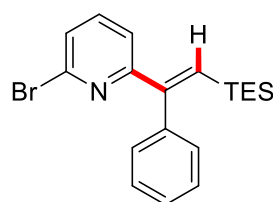

**(*E*)-2-Bromo-6-(1-phenyl-2-(triethylsilyl)vinyl)pyridine (3ar)**

The title compound was prepared according to the general procedure as a white solid (67.3 mg, 90% yield). <sup>1</sup>H NMR (500 MHz, CDCl<sub>3</sub>): δ 7.37–7.36 (m, 3H), 7.35–7.32 (m, 1H), 7.29–7.28 (m, 1H), 7.26 (s, 1H), 7.22–7.21 (m, 2H), 6.77 (d, *J* = 7.5 Hz, 1H), 0.85 (t, *J* = 8.0 Hz, 9H), 0.36 (q, *J* = 8.0 Hz, 1H); <sup>13</sup>C NMR (125 MHz, CDCl<sub>3</sub>): δ 159.13, 153.77, 141.90, 140.86, 138.58, 132.64, 129.56, 128.08, 127.65, 126.25,

120.74, 7.52, 4.11; HRMS (ESI)  $m/z$  calcd. for  $C_{19}H_{25}BrNSi_2$   $[M+H]^+ = 374.0934$ , found = 374.0936.

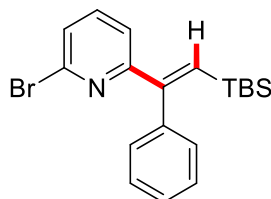

**(*E*)-2-Bromo-6-(2-(tert-butyldimethylsilyl)-1-phenylvinyl)pyridine (3as)**

The title compound was prepared according to the general procedure as a white solid (52.3 mg, 70% yield).  $^1H$  NMR (500 MHz,  $CDCl_3$ ):  $\delta$  7.39–7.31 (m, 5H), 7.29–7.28 (m, 1H), 7.21–7.20 (m, 2H), 6.76 (d,  $J = 7.0$  Hz, 1H), 0.93 (s, 9H), -0.30 (s, 6H);  $^{13}C$  NMR (125 MHz,  $CDCl_3$ ):  $\delta$  159.14, 153.74, 141.90, 140.67, 138.58, 132.31, 129.85, 128.11, 127.52, 126.26, 120.70, 26.73, 17.03, -5.14; HRMS (ESI)  $m/z$  calcd. for  $C_{19}H_{25}BrNSi_2$   $[M+H]^+ = 374.0934$ , found = 374.0936.

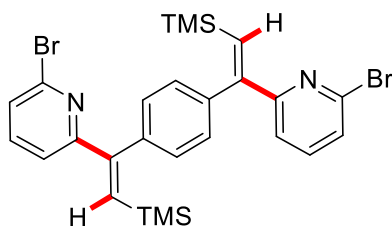

**1,4-Bis((*E*)-1-(6-bromopyridin-2-yl)-2-(trimethylsilyl)vinyl)benzene (3at)**

The title compound was prepared according to the general procedure as a white solid (104.1 mg, 89% yield).  $^1H$  NMR (500 MHz,  $CDCl_3$ ):  $\delta$  7.34–7.31 (m, 2H), 7.28–7.27 (m, 4H), 7.20 (br, 4H), 6.77 (d,  $J = 7.5$  Hz, 2H), -0.08 (s, 18H);  $^{13}C$  NMR (125 MHz,  $CDCl_3$ ):  $\delta$  159.04, 152.70, 142.00, 140.13, 138.69, 135.55, 129.74, 126.43, 120.59, -0.07; HRMS (ESI)  $m/z$  calcd. for  $C_{26}H_{31}Br_2N_2Si_2$   $[M+H]^+ = 585.0387$ , found = 585.0388.

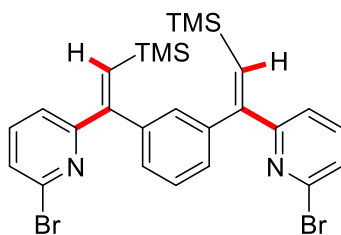

**1,3-Bis((*E*)-1-(6-bromopyridin-2-yl)-2-(trimethylsilyl)vinyl)benzene (3au)**

The title compound was prepared according to the general procedure as a white solid (79.6 mg, 68% yield).  $^1\text{H}$  NMR (500 MHz,  $\text{CDCl}_3$ ):  $\delta$  7.46–7.43 (m, 1H), 7.37–7.34 (m, 2H), 7.31–7.30 (m, 2H), 7.26–7.25 (m, 3H), 7.22 (s, 2H), 7.03 (s, 1H), 6.89 (d,  $J$  = 7.5 Hz, 2H), -0.07 (s, 18H);  $^{13}\text{C}$  NMR (125 MHz,  $\text{CDCl}_3$ ):  $\delta$  159.25, 152.98, 141.92, 140.86, 138.53, 135.51, 130.59, 129.27, 128.26, 126.46, 120.84, 0.01; HRMS (ESI)  $m/z$  calcd. for  $\text{C}_{26}\text{H}_{31}\text{Br}_2\text{N}_2\text{Si}_2$   $[\text{M}+\text{H}]^+ = 585.0387$ , found = 585.0388.

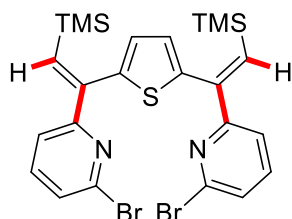

**2,5-Bis((Z)-1-(6-bromopyridin-2-yl)-2-(trimethylsilyl)vinyl)thiophene (3av)**

The title compound was prepared according to the general procedure as a white solid (113.9 mg, 64% yield).  $^1\text{H}$  NMR (500 MHz,  $\text{CDCl}_3$ ):  $\delta$  7.44–7.41 (m, 2H), 7.34 (d,  $J$  = 8.0 Hz, 2H), 7.29 (s, 2H), 7.16 (d,  $J$  = 7.5 Hz, 2H), 6.93 (s, 2H), 0.09 (s, 18H);  $^{13}\text{C}$  NMR (125 MHz,  $\text{CDCl}_3$ ):  $\delta$  159.22, 145.45, 142.39, 141.74, 139.55, 138.70, 128.05, 126.69, 120.43, -0.17; HRMS (ESI)  $m/z$  calcd. for  $\text{C}_{24}\text{H}_{29}\text{Br}_2\text{N}_2\text{Si}_2$   $[\text{M}+\text{H}]^+ = 590.9951$ , found = 590.9954.

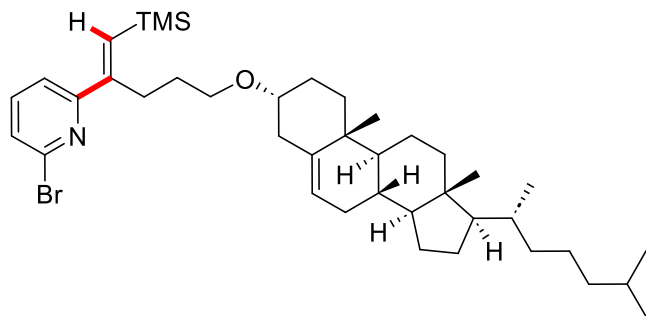

**2-Bromo-6-((E)-5-(((3R,8S,9S,10R,13R,14S,17R)-10,13-dimethyl-17-((R)-6-methylheptan-2-yl)-2,3,4,7,8,9,10,11,12,13,14,15,16,17-tetradecahydro-1H-cyclopenta[a]phenanthren-3-yl)oxy)-1-(trimethylsilyl)pent-1-en-2-yl)pyridine (3aw)**

The title compound was prepared according to the general procedure as a white solid (117.3 mg, 86% yield).  $^1\text{H}$  NMR (500 MHz,  $\text{CDCl}_3$ ):  $\delta$  7.48–7.45 (m, 1H), 7.41 (d,  $J$  = 7.5 Hz, 1H), 7.31 (d,  $J$  = 7.5 Hz, 1H), 6.36 (s, 1H), 5.34–5.33 (m, 1H), 3.47 (t,  $J$  = 6.5 Hz, 2H), 3.15–3.10 (m, 1H), 2.76–2.73 (m, 2H), 2.36–2.33 (m, 1H), 2.20–2.15 (m, 3H),

2.02–1.95 (m, 2H), 1.90–1.79 (m, 3H), 1.67–1.25 (m, 15H), 1.16–0.86 (m, 20H), 0.68 (s, 3H), 0.21 (s, 9H);  $^{13}\text{C}$  NMR (125 MHz,  $\text{CDCl}_3$ ):  $\delta$  160.87, 154.36, 141.31, 141.08, 138.57, 132.71, 126.11, 121.44, 119.30, 78.96, 67.62, 56.79, 56.16, 50.21, 42.32, 39.79, 39.51, 39.19, 37.25, 36.90, 36.19, 35.78, 31.96, 31.90, 30.91, 30.06, 29.85, 28.46, 28.23, 28.00, 24.29, 23.82, 22.81, 22.55, 21.07, 19.38, 18.71, 11.85, 0.09; HRMS (ESI)  $m/z$  calcd. for  $\text{C}_{40}\text{H}_{65}\text{BrNSi}$   $[\text{M}+\text{H}]^+ = 682.4013$ , found = 682.4015.

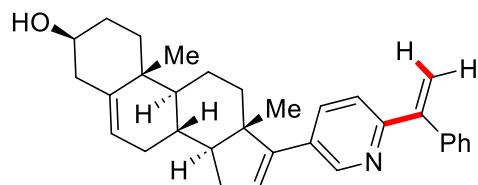

**(3*S*,8*R*,9*S*,10*R*,13*S*,14*S*)-10,13-Dimethyl-17-(6-(1-phenylvinyl)pyridin-3-yl)-2,3,4,7,8,9,10,11,12,13,14,15-dodecahydro-1H-cyclopenta[*a*]phenanthren-3-ol (3ax)**

The title compound was prepared according to the general procedure as a white solid (68.7 mg, 76% yield).  $^1\text{H}$  NMR (500 MHz,  $\text{CDCl}_3$ ):  $\delta$  8.67 (s, 1H), 7.60 (d,  $J = 8.0$  Hz, 1H), 7.37–7.33 (m, 5H), 7.19 (d,  $J = 8.0$  Hz, 1H), 6.03 (br, 1H), 6.01 (s, 1H), 5.56 (s, 1H), 5.39 (d,  $J = 5.0$  Hz, 1H), 3.54 (br, 1H), 2.35–2.24 (m, 3H), 2.10–2.05 (m, 3H), 1.87–1.85 (m, 2H), 1.79–1.74 (m, 3H), 1.71–1.63 (m, 3H), 1.53–1.47 (m, 3H), 1.13–1.04 (m, 8H);  $^{13}\text{C}$  NMR (125 MHz,  $\text{CDCl}_3$ ):  $\delta$  156.39, 151.51, 148.95, 147.40, 141.13, 140.50, 133.78, 131.64, 129.18, 128.50, 128.25, 127.78, 122.14, 121.35, 117.26, 71.71, 57.52, 50.34, 47.29, 42.29, 37.17, 36.69, 35.29, 31.82, 31.62, 31.51, 30.43, 20.89, 19.33, 16.59; HRMS (ESI)  $m/z$  calcd. for  $\text{C}_{32}\text{H}_{38}\text{NO}$   $[\text{M}+\text{H}]^+ = 452.2948$ , found = 452.2951.

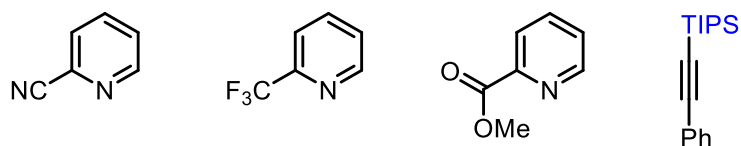

**Scheme S1.** Ineffect substrates for the present C–H alkenylation by **Sc-4**.

## References

1. (a) X.-Y. Jin, C.-S. Wu, A.-D. Liu, L. Liu, L. Cheng, *Synthesis*, **2022**, *54*, 1643. (b) T. X. Neenan, G. M. Whitesides, *J. Org. Chem.*, **1988**, *53*, 2489.
2. (a) L. E. Manzer, *J. Am. Chem. Soc.*, **1978**, *100*, 8068. (b) M. Nishiura, J. Baldamus, T. Shima, K. Mori, Z. Hou, *Chem. Eur. J.*, **2011**, *17*, 5033. (c) T. Shima, M. Nishiura, Z. Hou, *Organometallics*, **2011**, *30*, 2513. (d) X. Li, M. Nishiura, K. Mori, T. Mashiko, Z. Hou, *Chem. Commun.*, **2007**, 4137.

# IV NMR spectra

zw--84-22-4

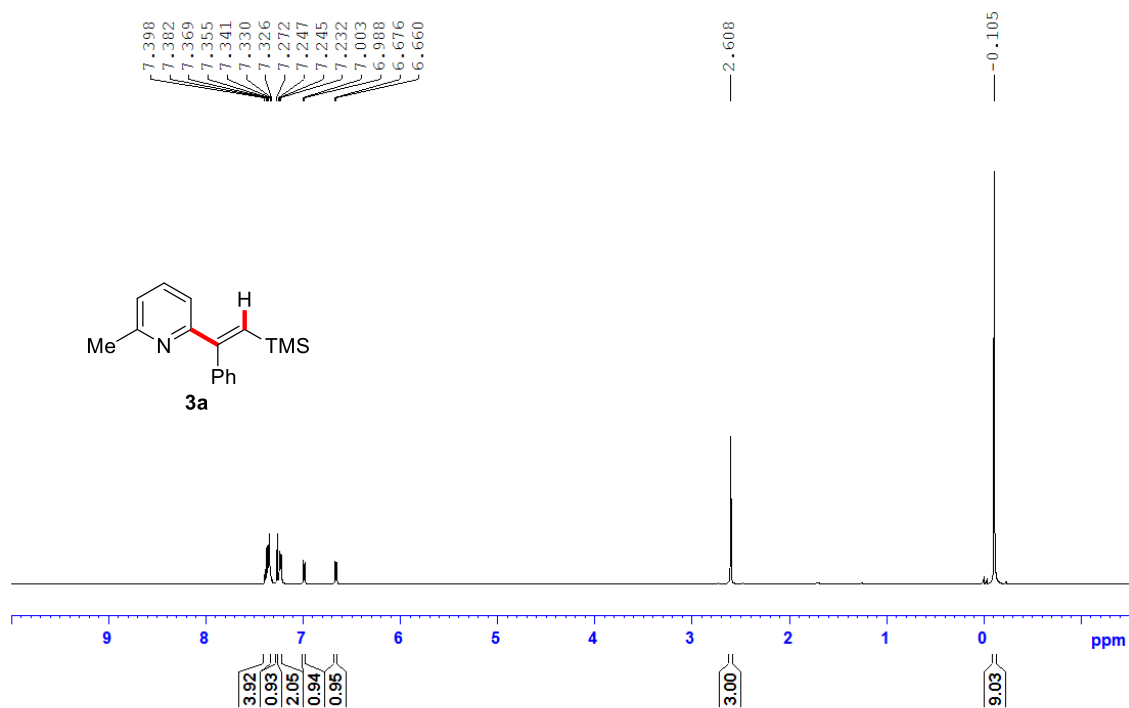

zw--84-22-4c

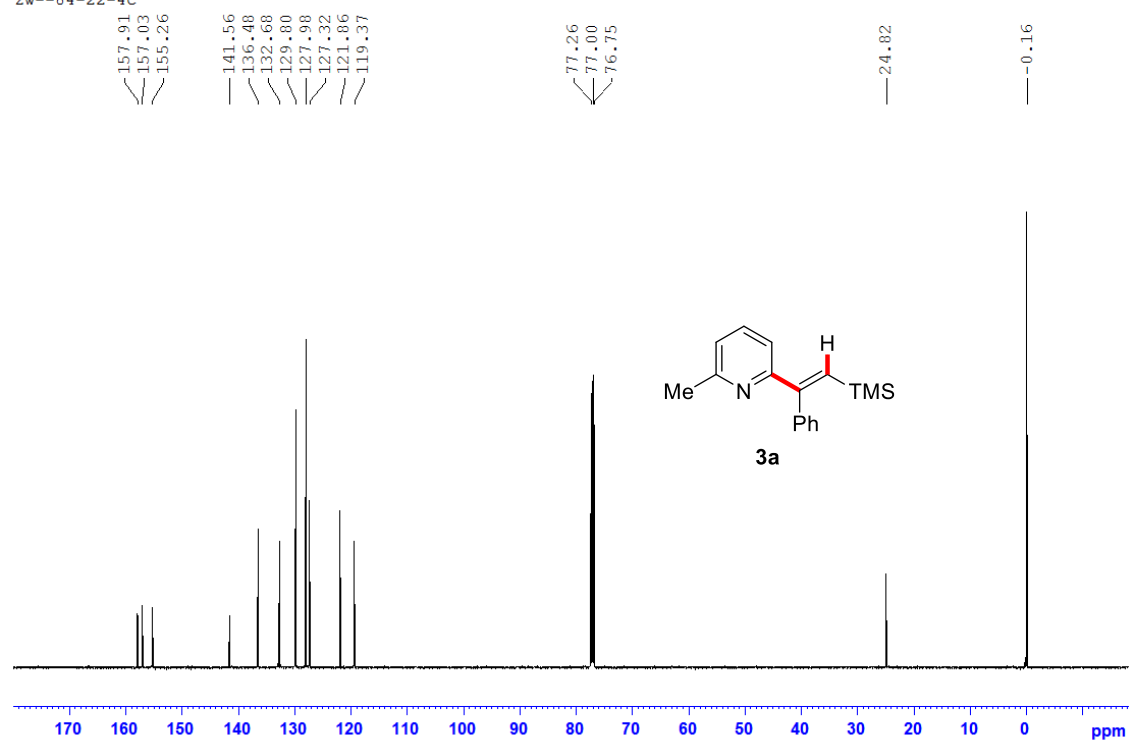

zw-84-36-1

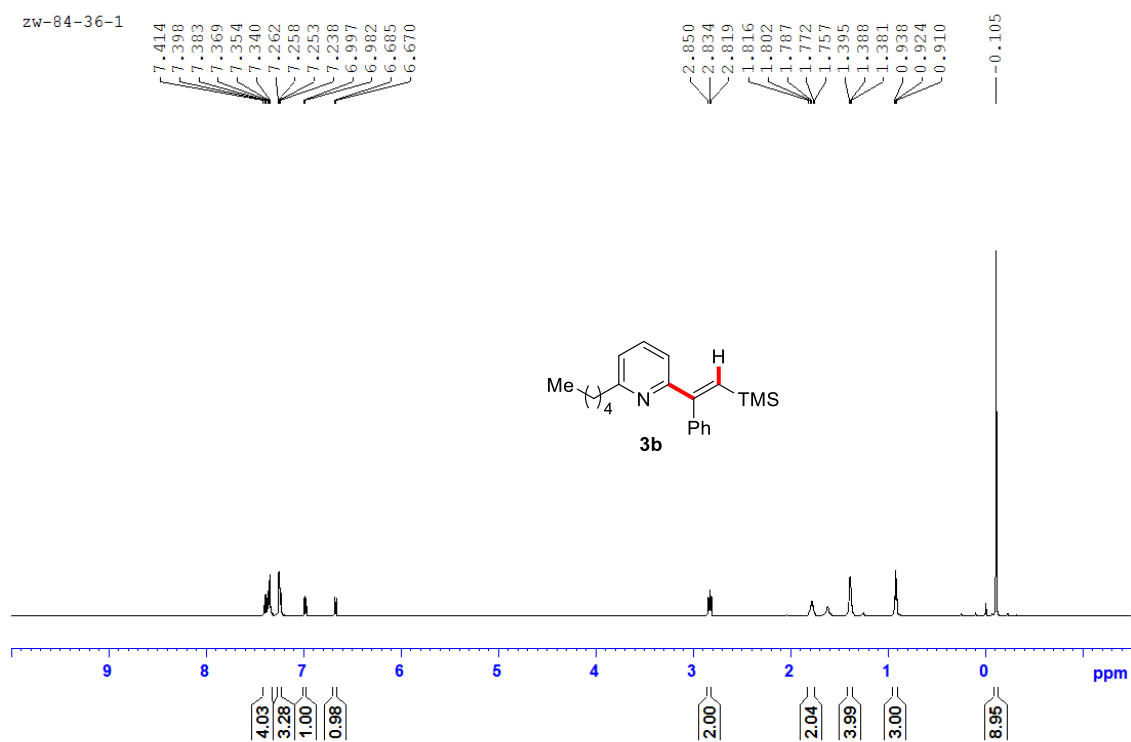

zw-84-36-1c

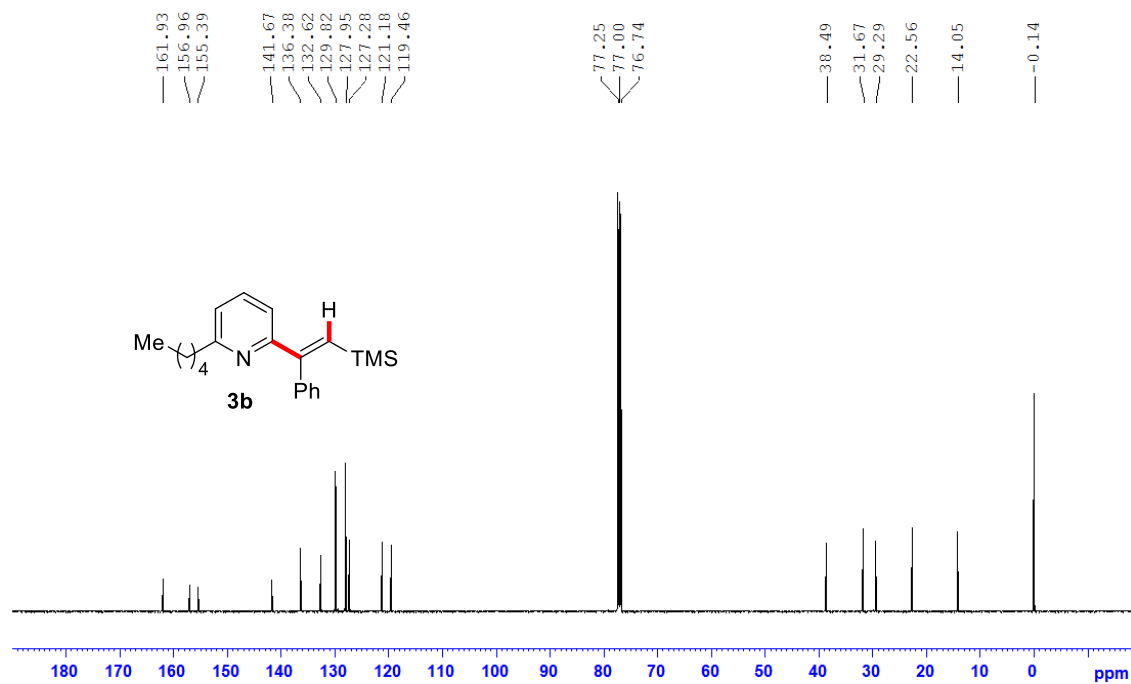

zw-84-23-4

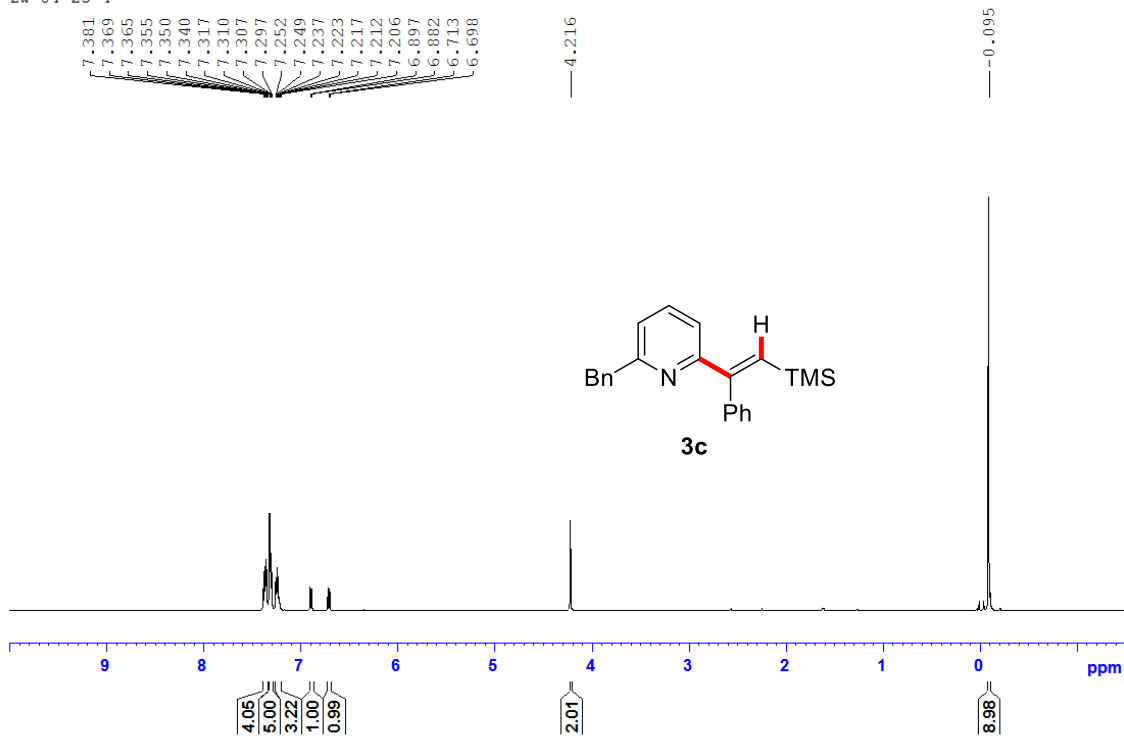

zw-84-23-4c

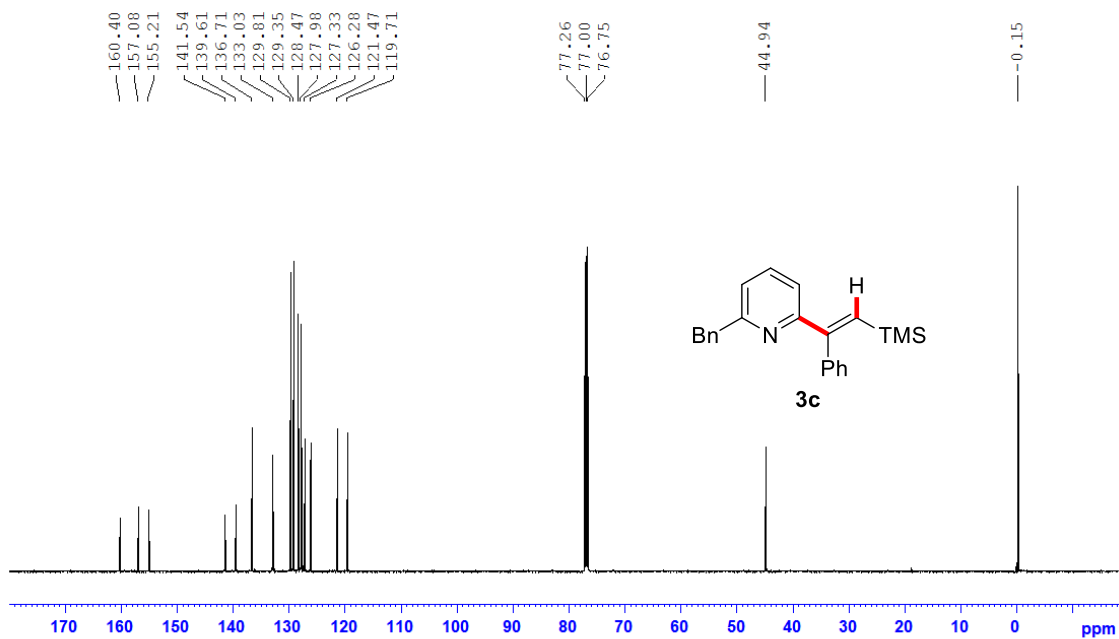

zw-84-22-2

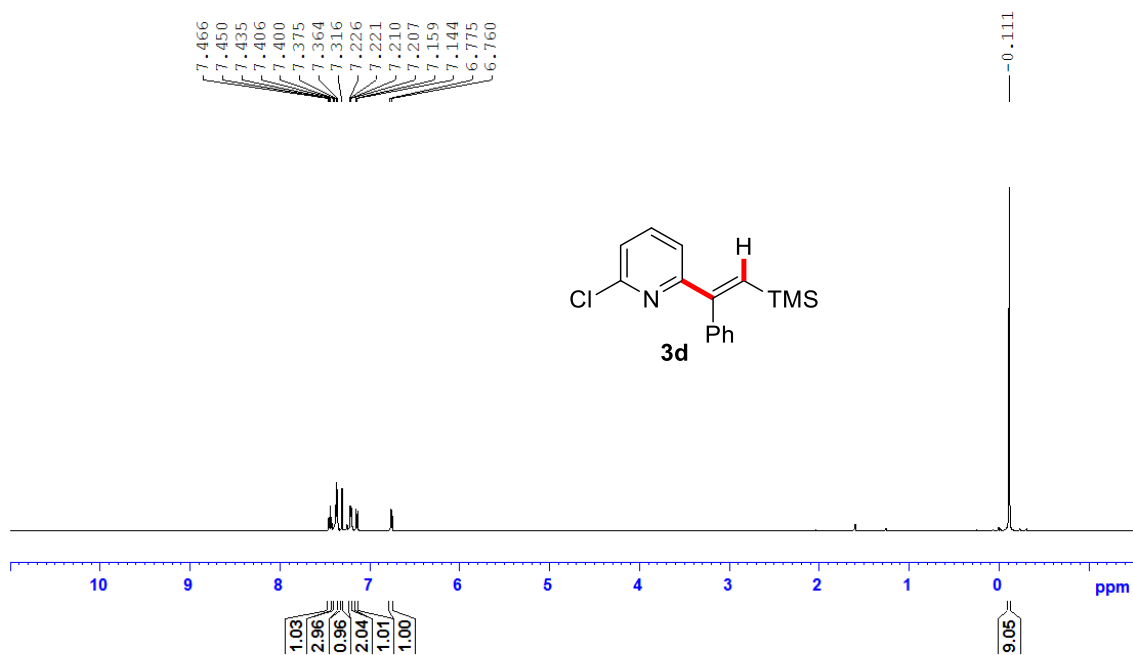

zw-84-22-2c

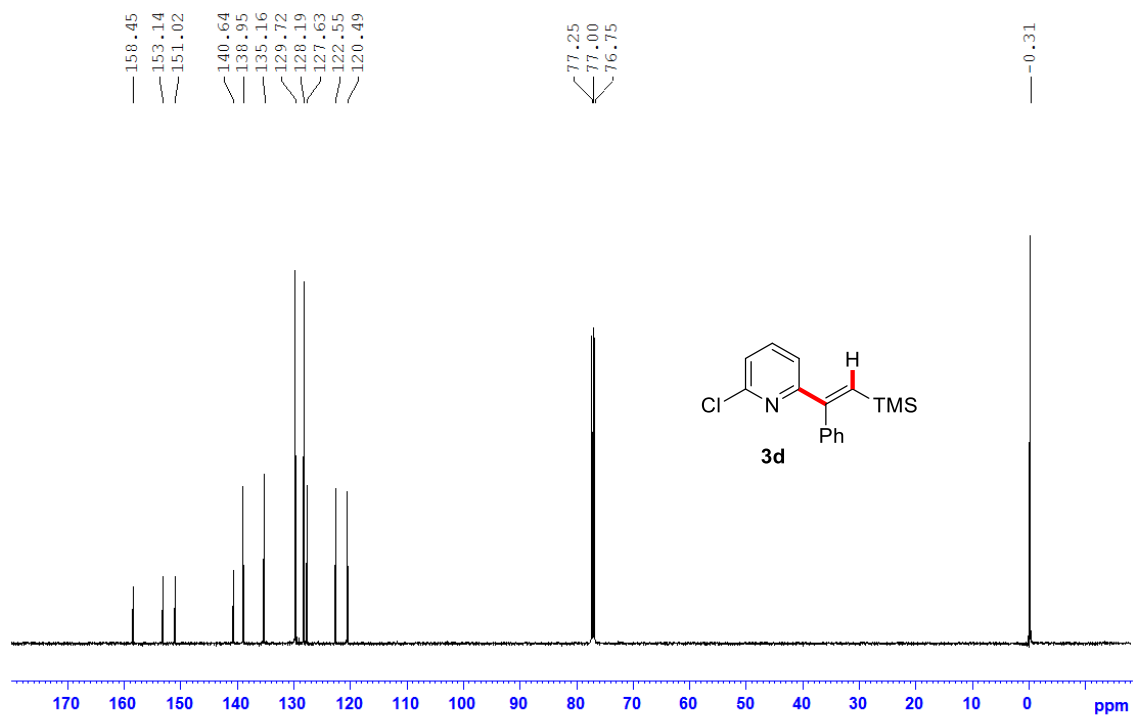

zw-84-22-3

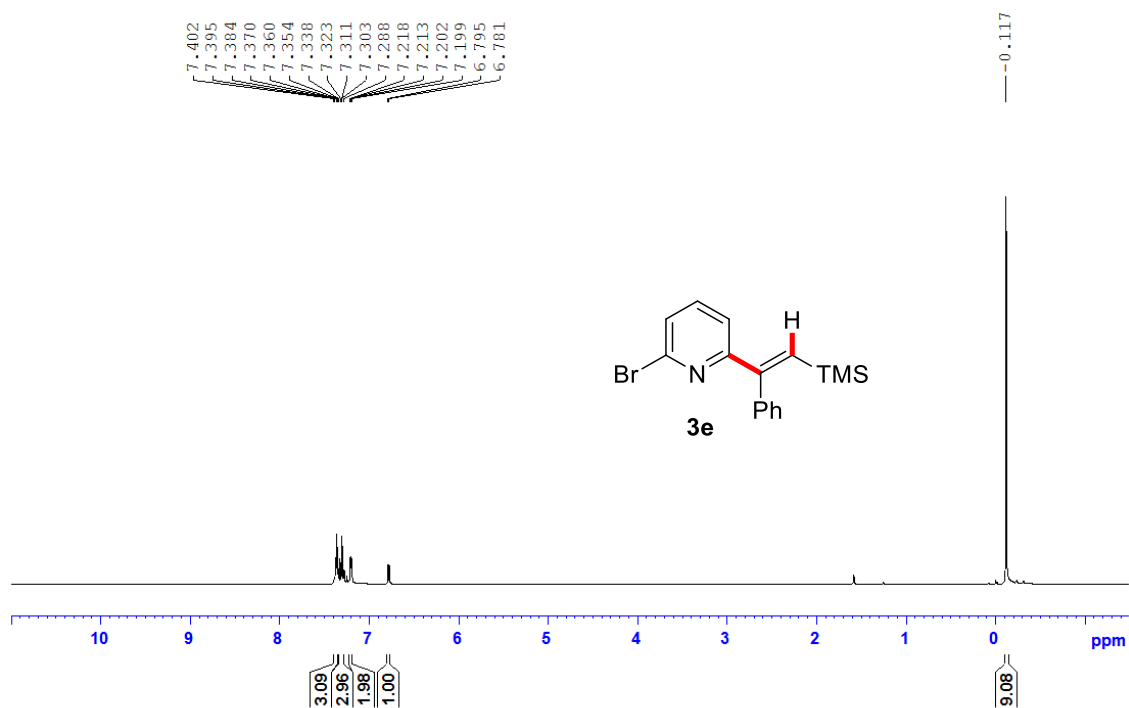

zw-84-22-3c

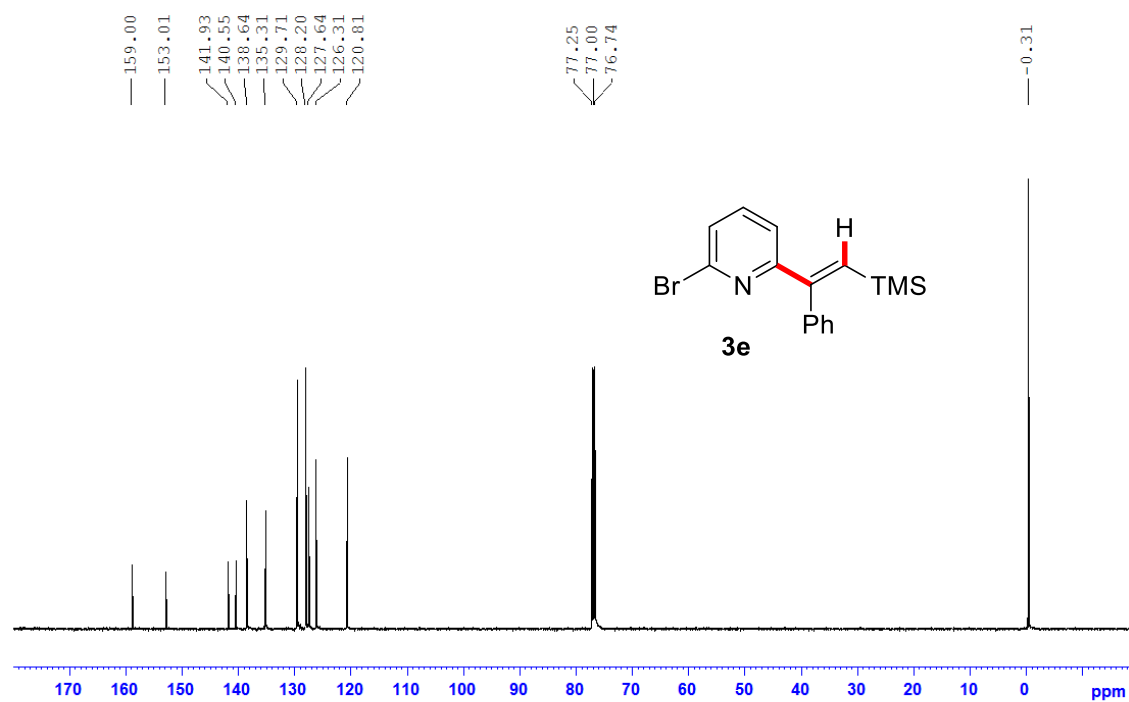

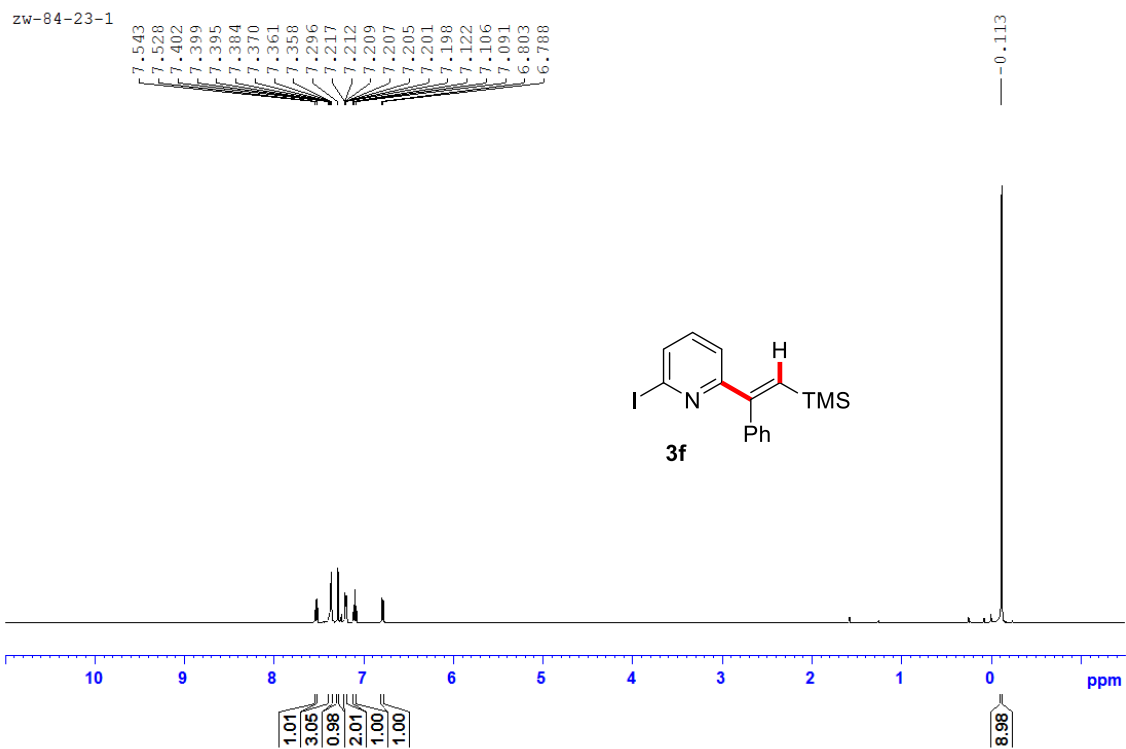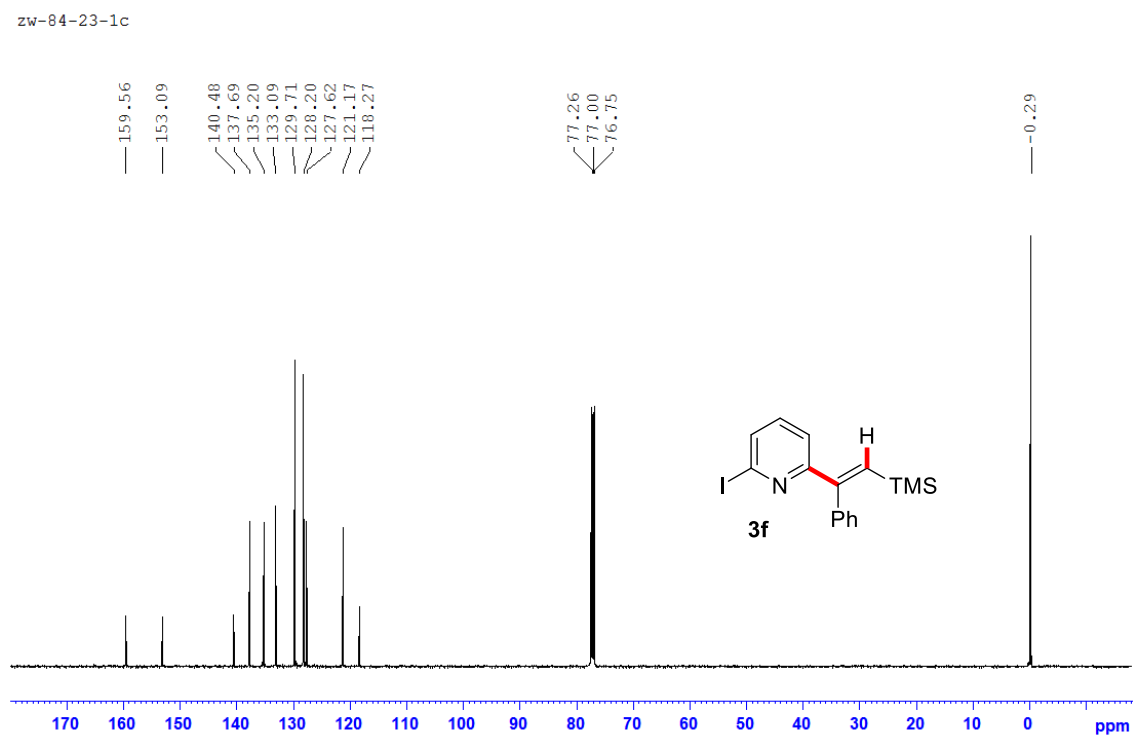

zw-84-35-1

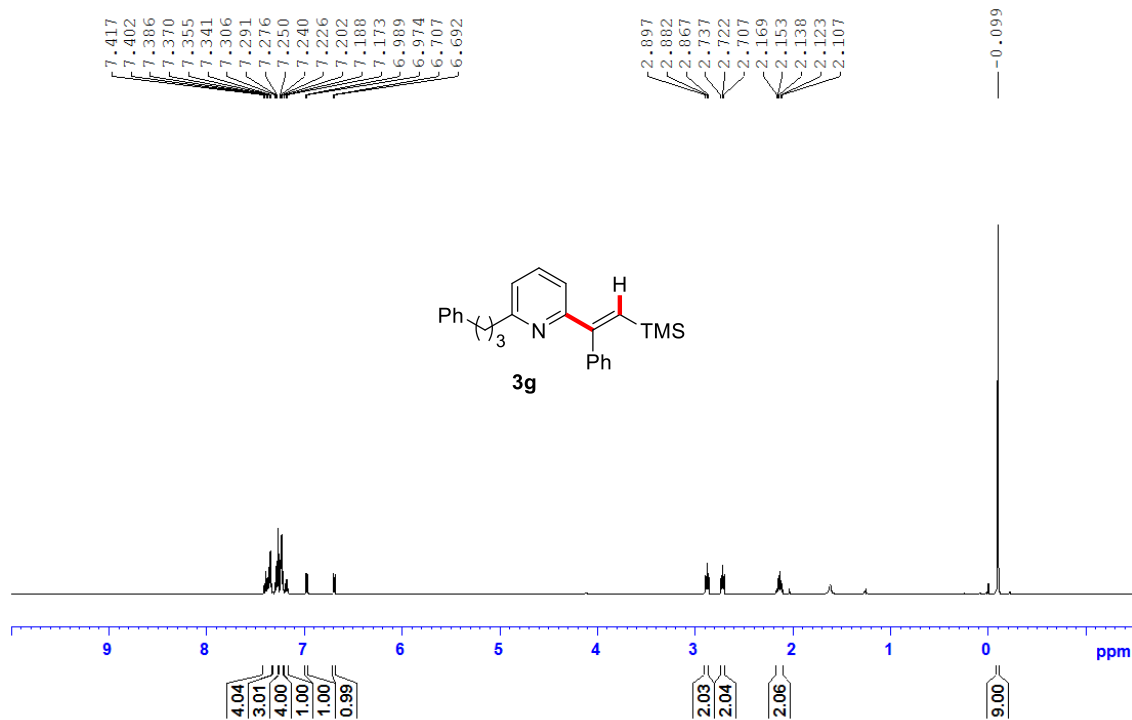

zw-84-35-1c

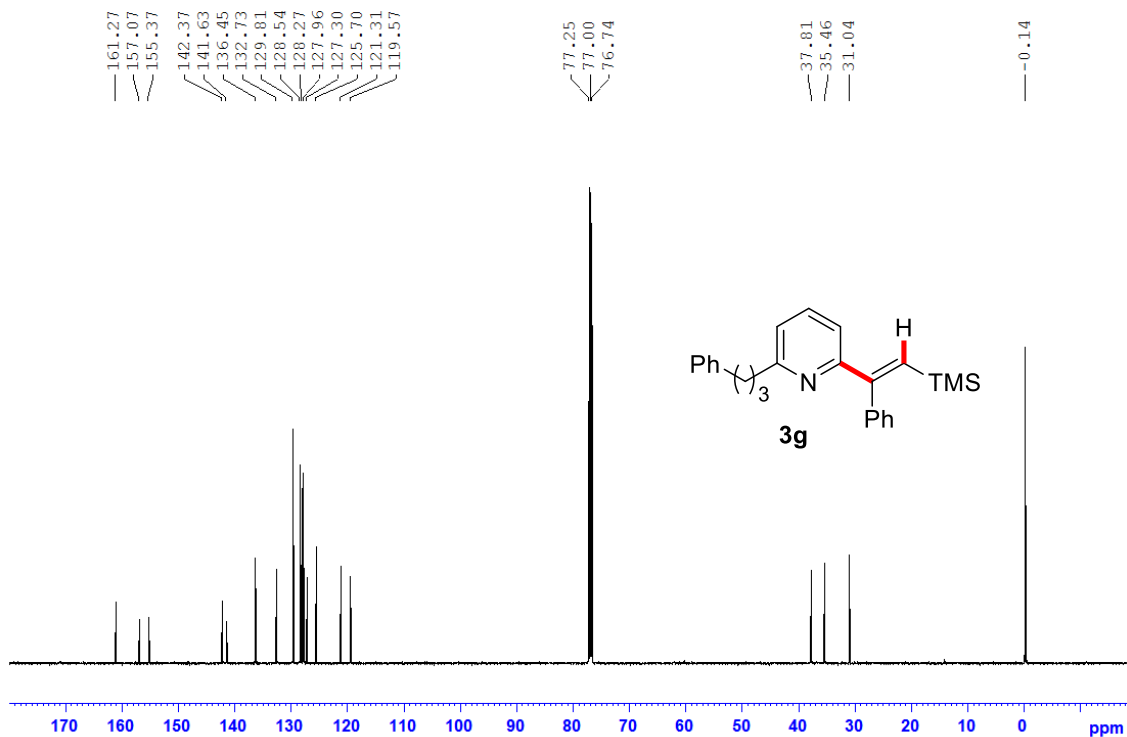

zw-84-32-2

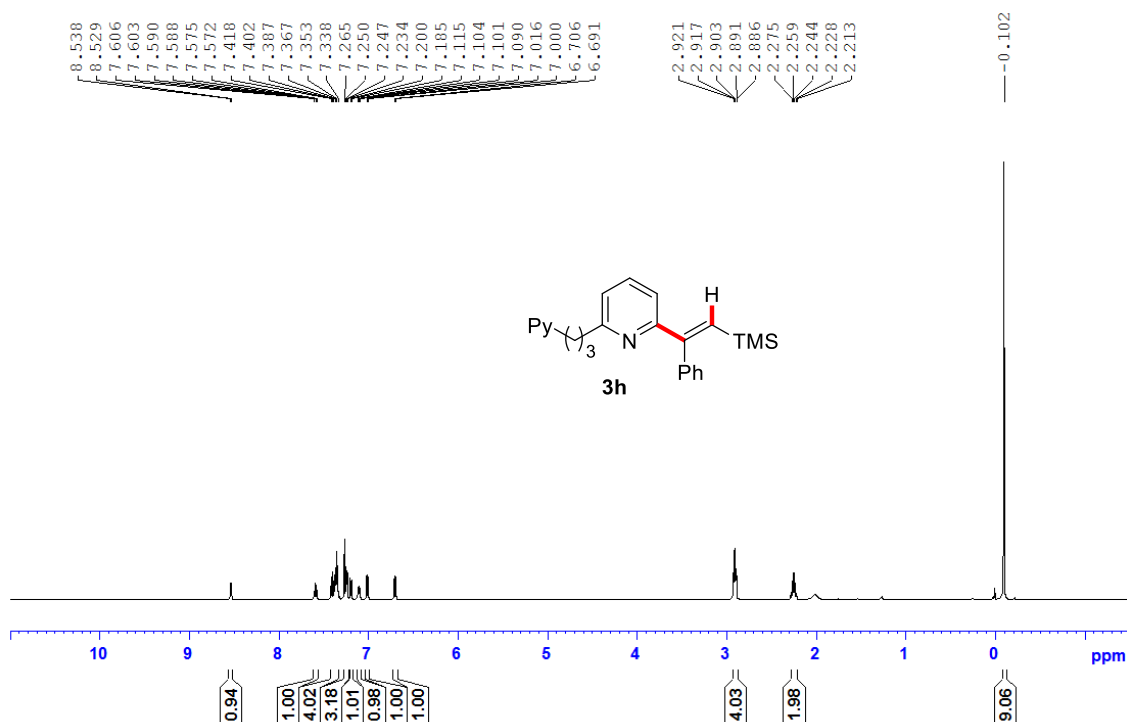

zw-84-32-2c

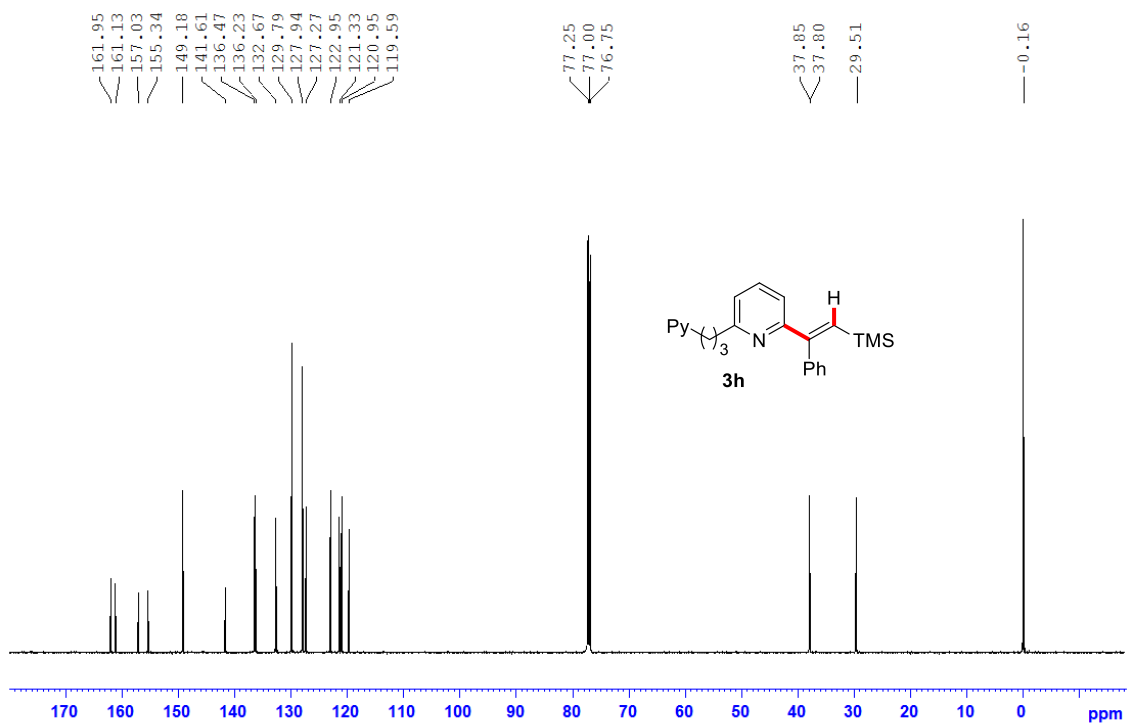

zw-84-29-2

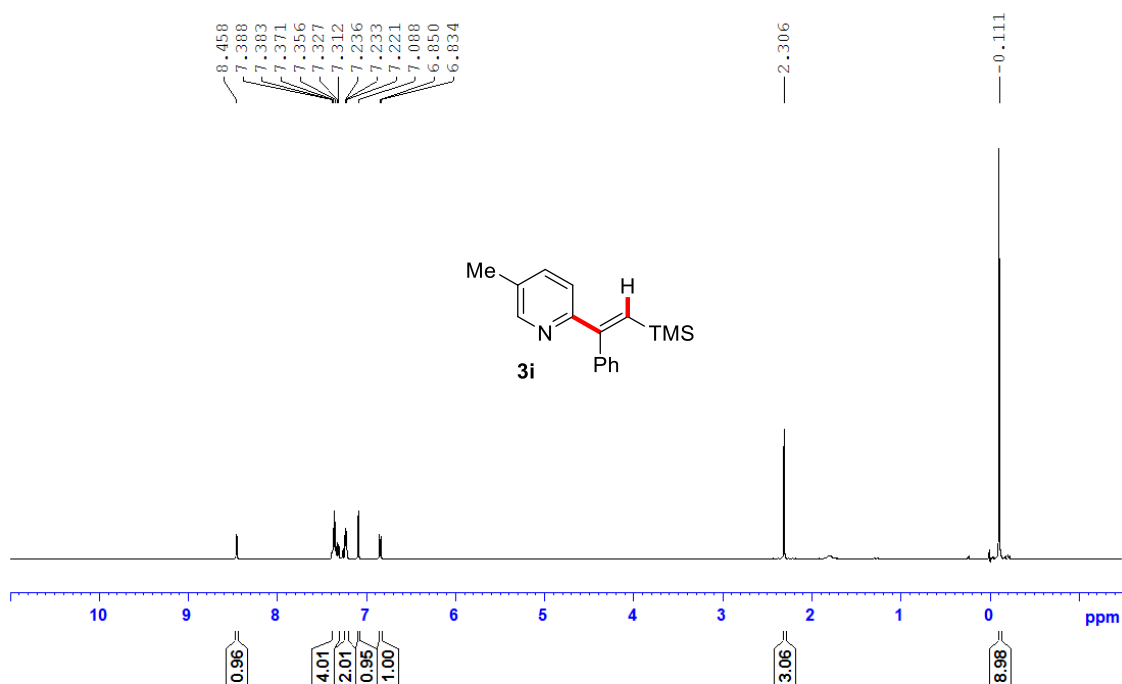

zw-84-29-2c

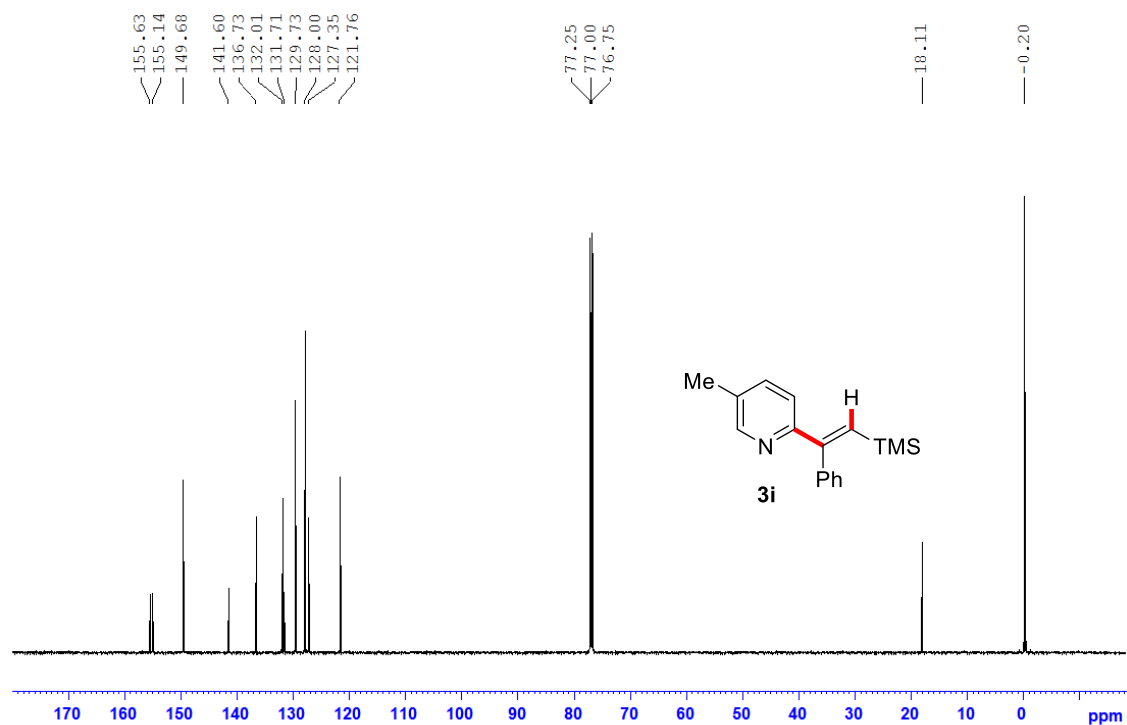

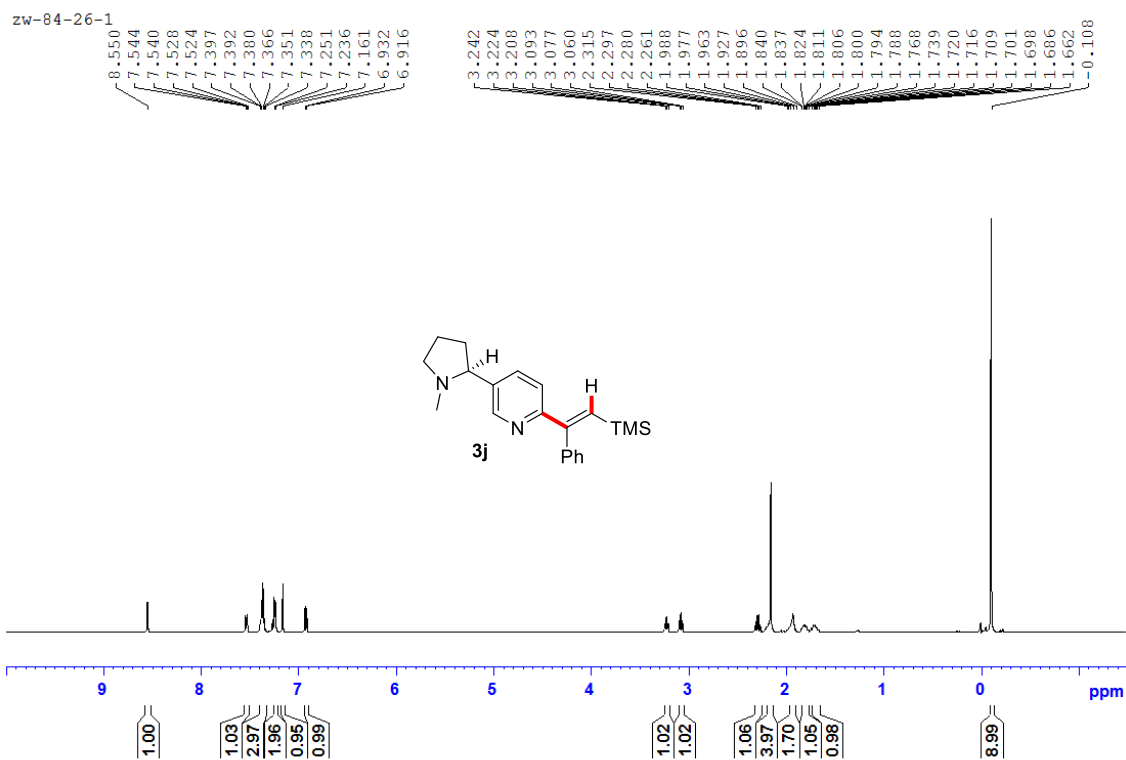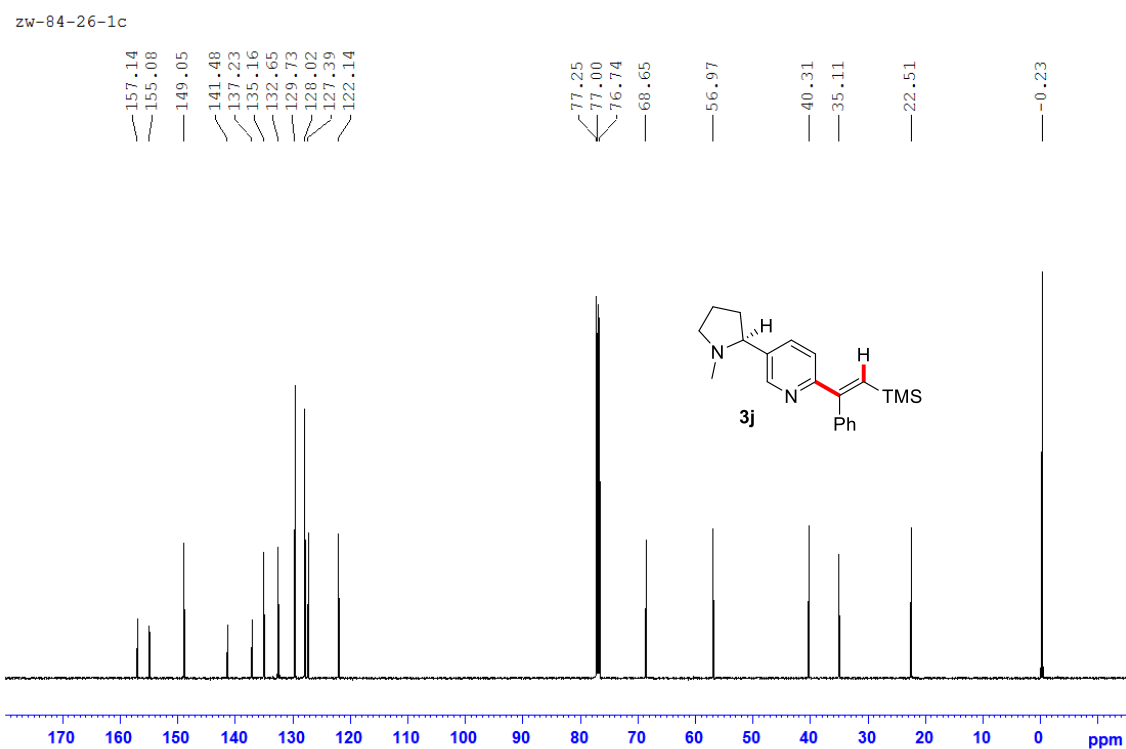

zw-84-23-3

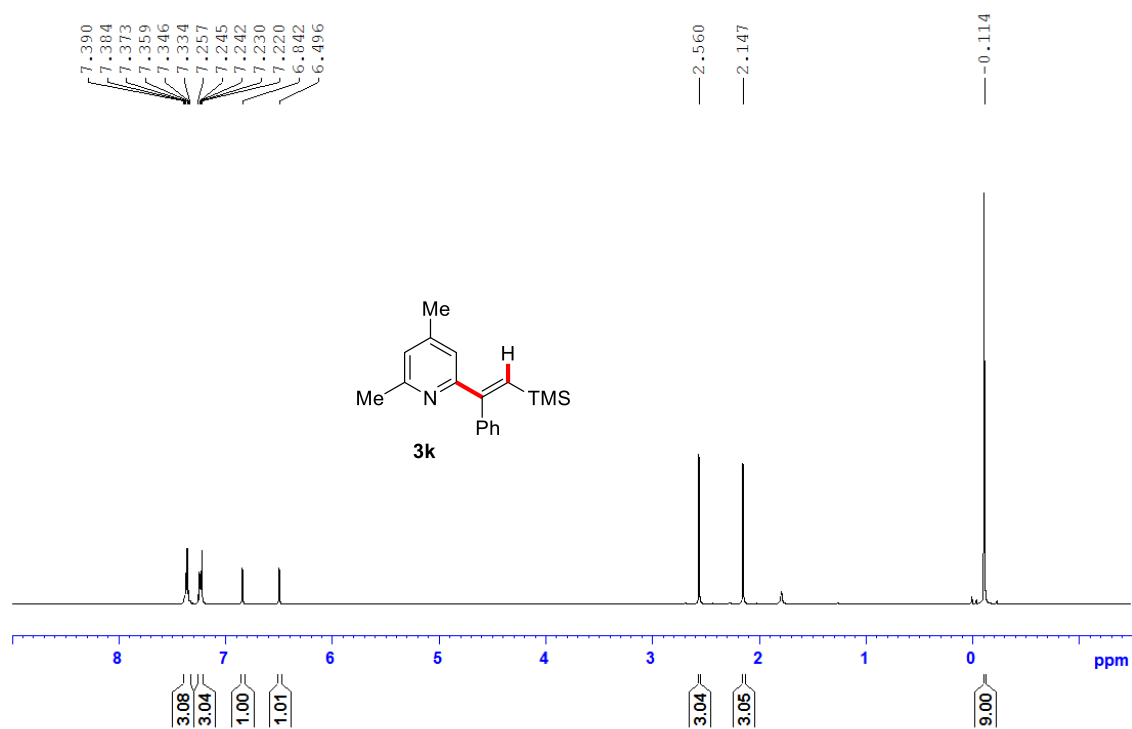

zw-84-23-3c

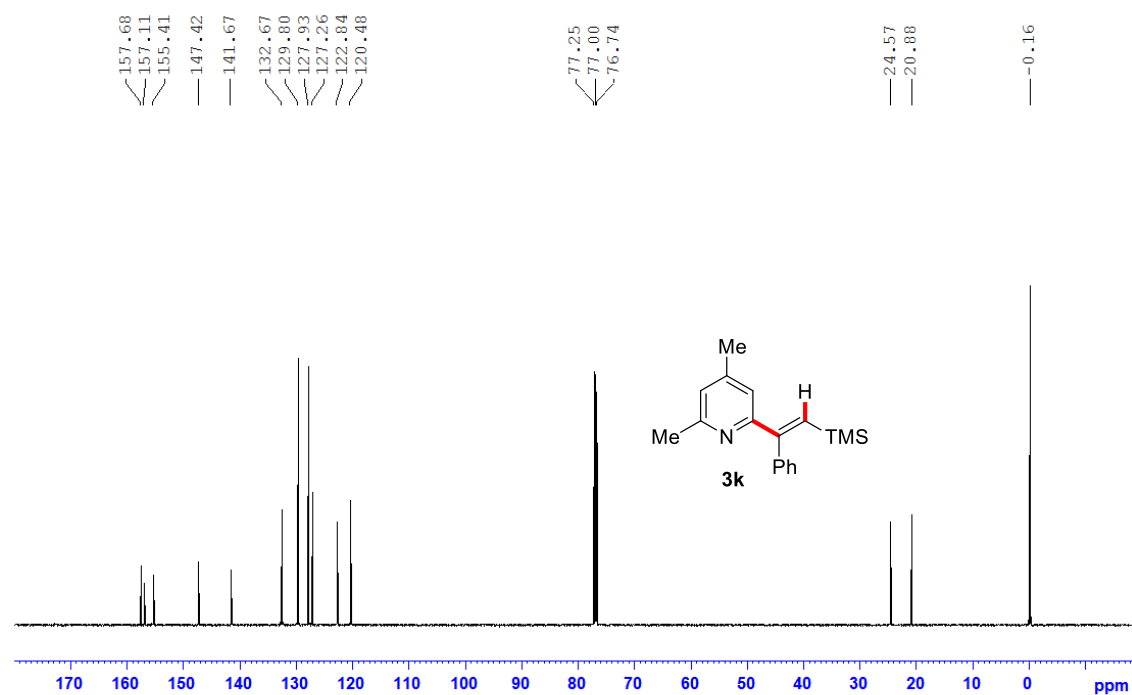

zw-84-31-1

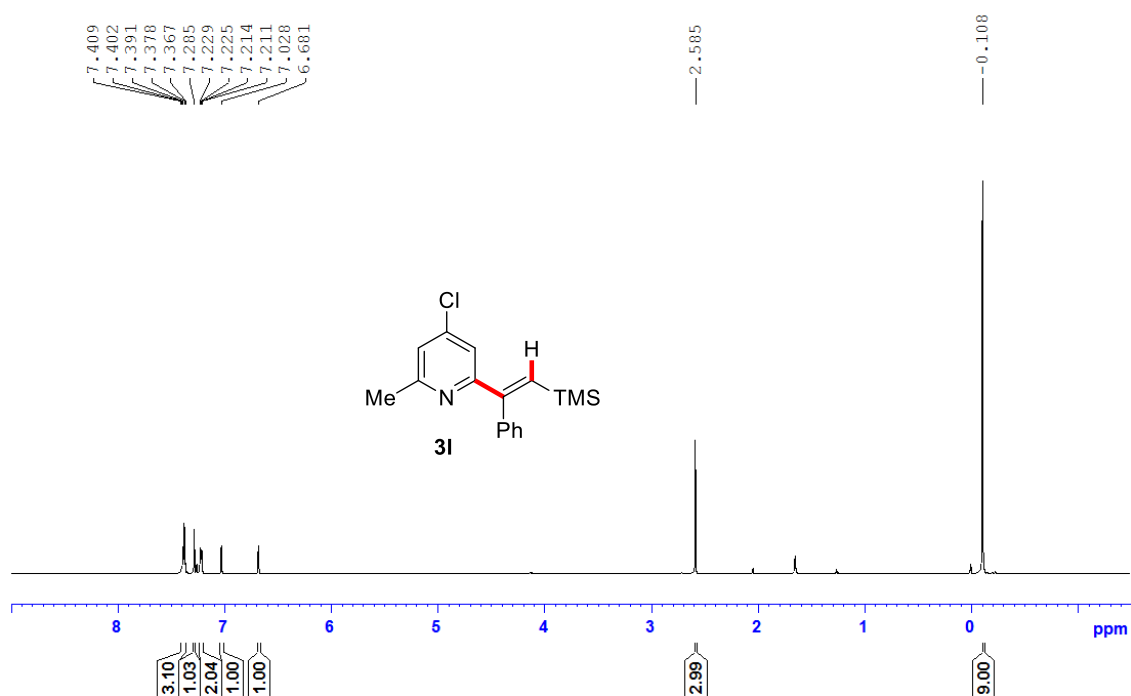

zw-84-31-1c

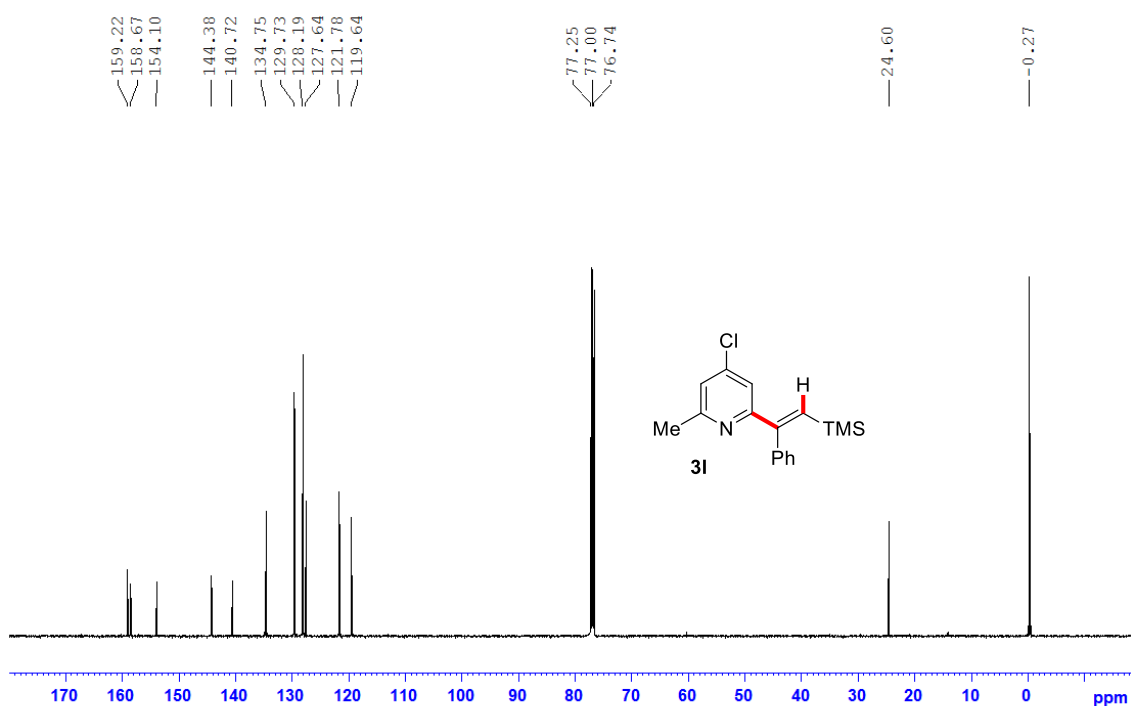

zw-84-31-2

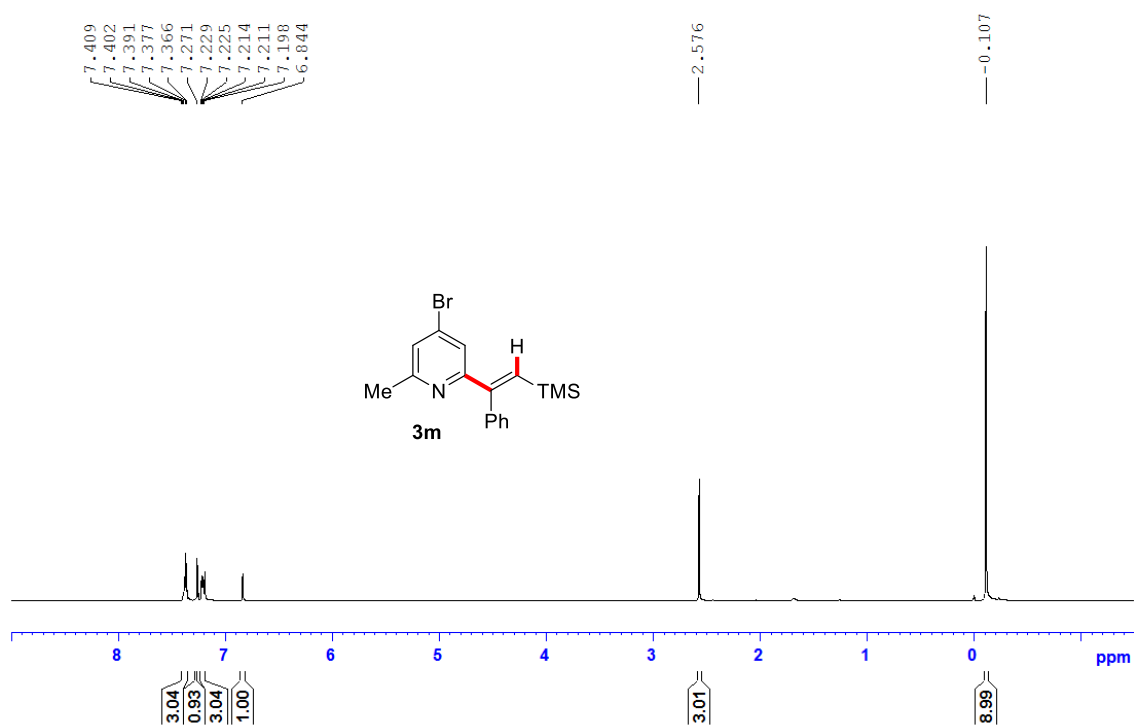

zw-84-31-2c

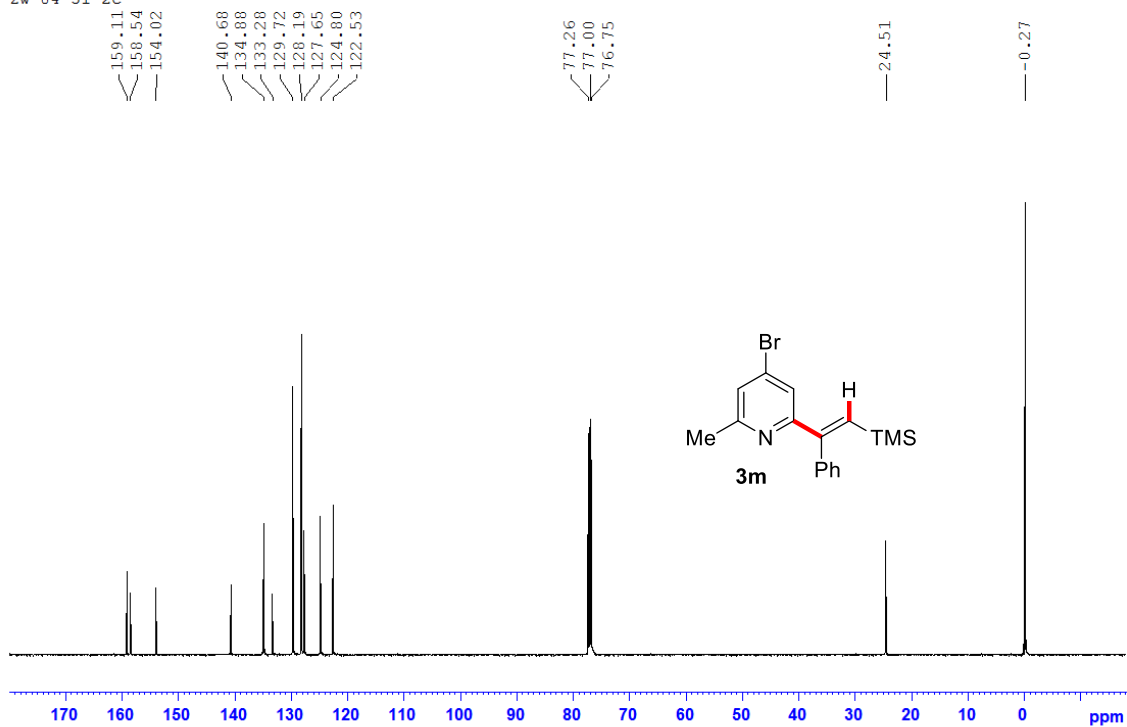

zw-84-23-2

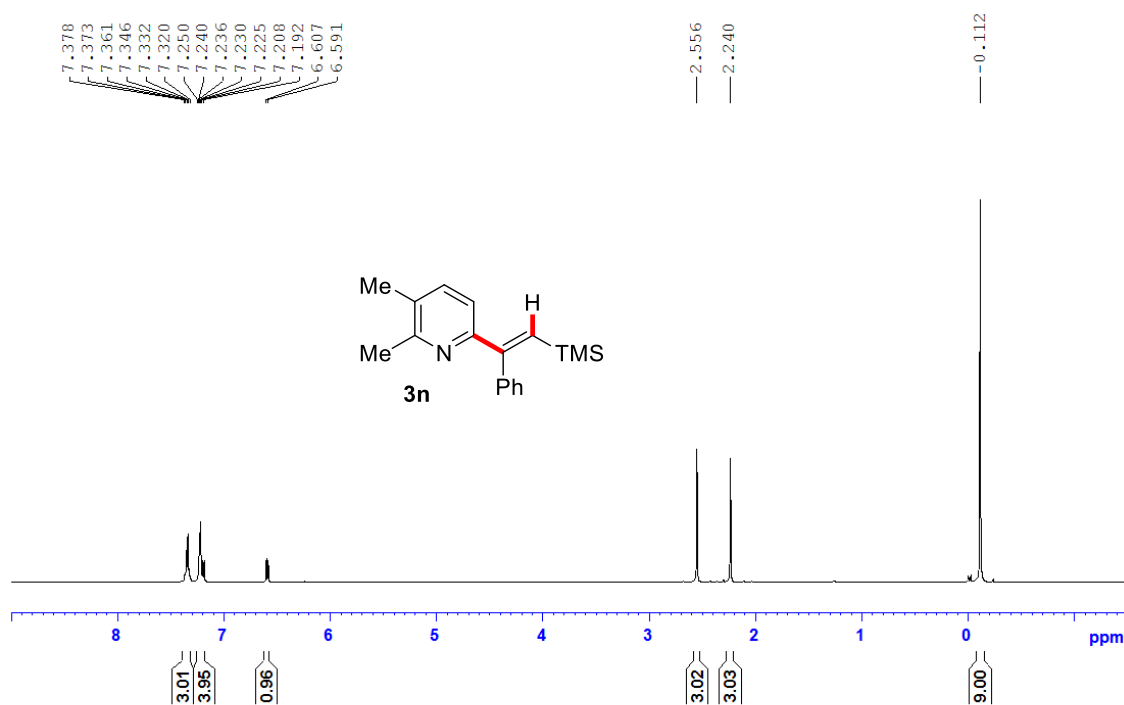

zw-84-23-2c

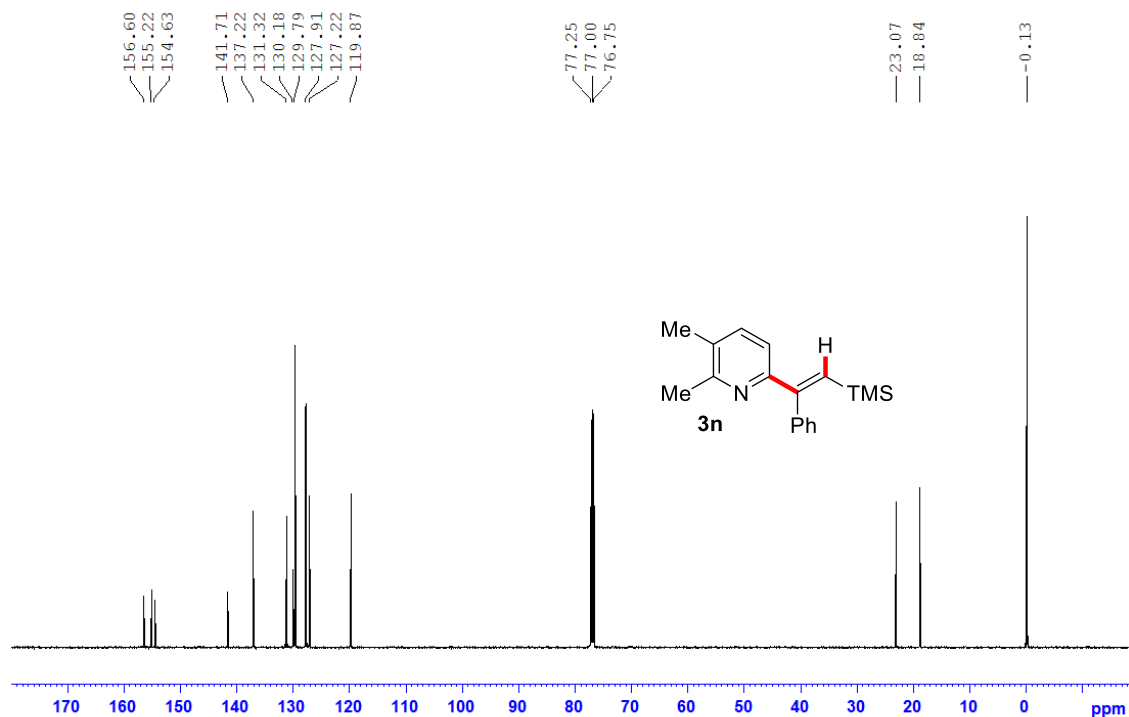

zw-84-31-3

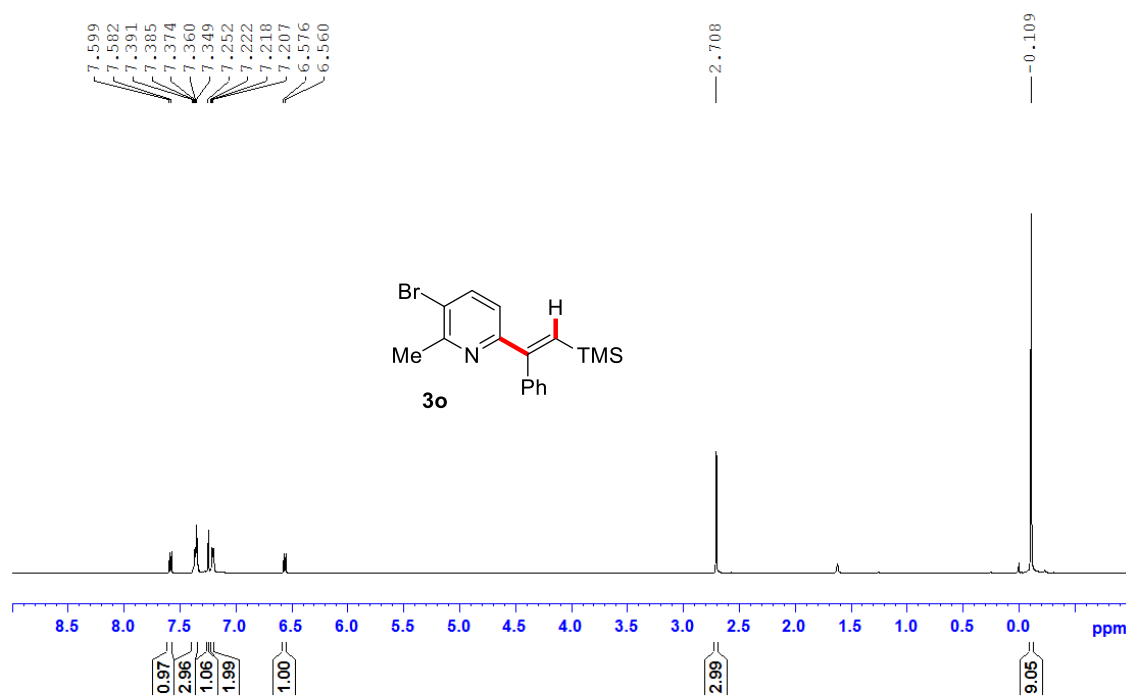

zw-84-31-3c

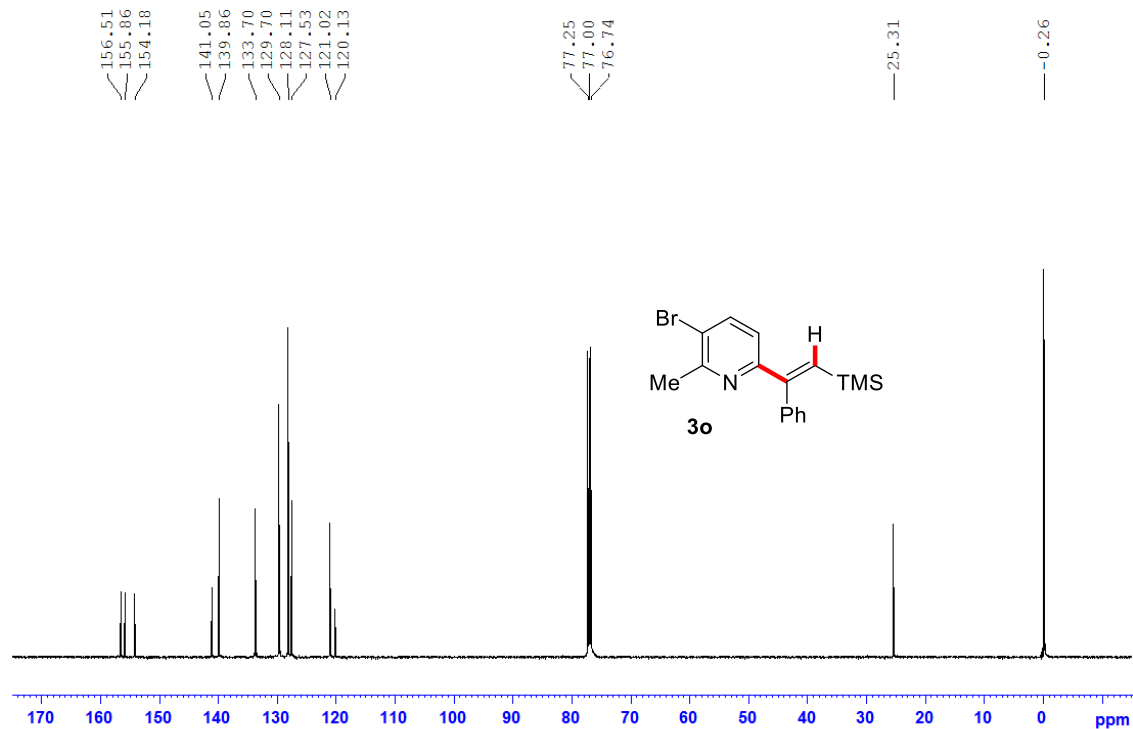

zw-84-36-2

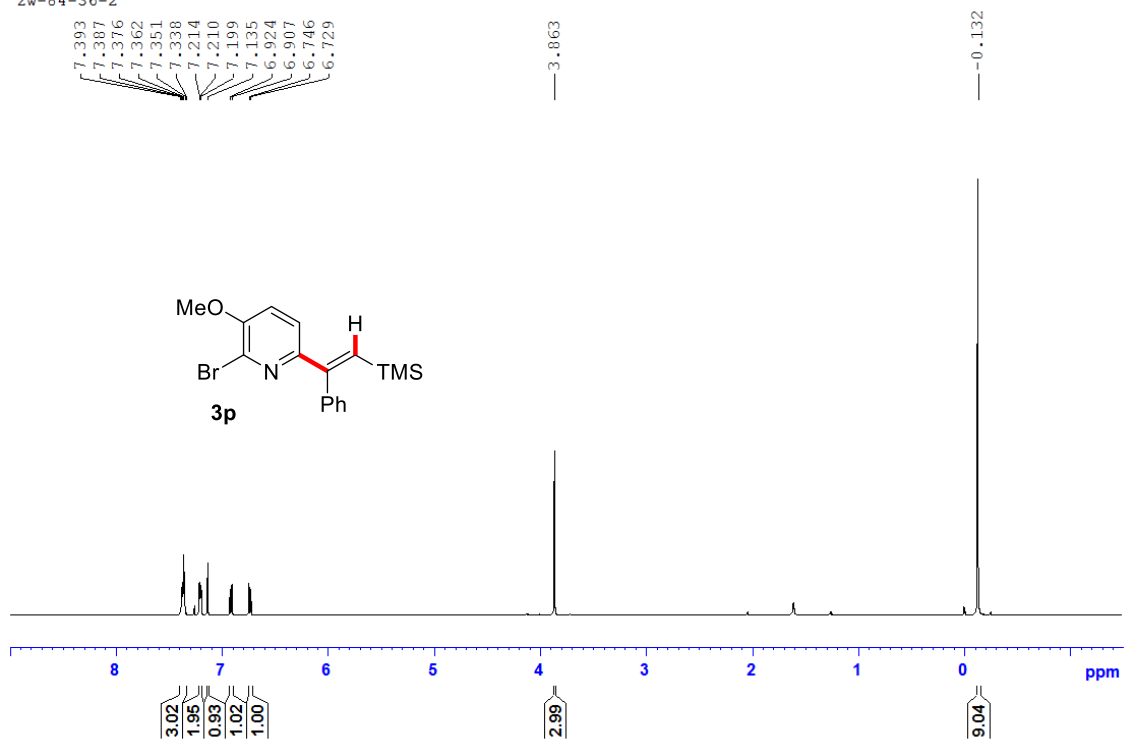

zw-84-36-2c

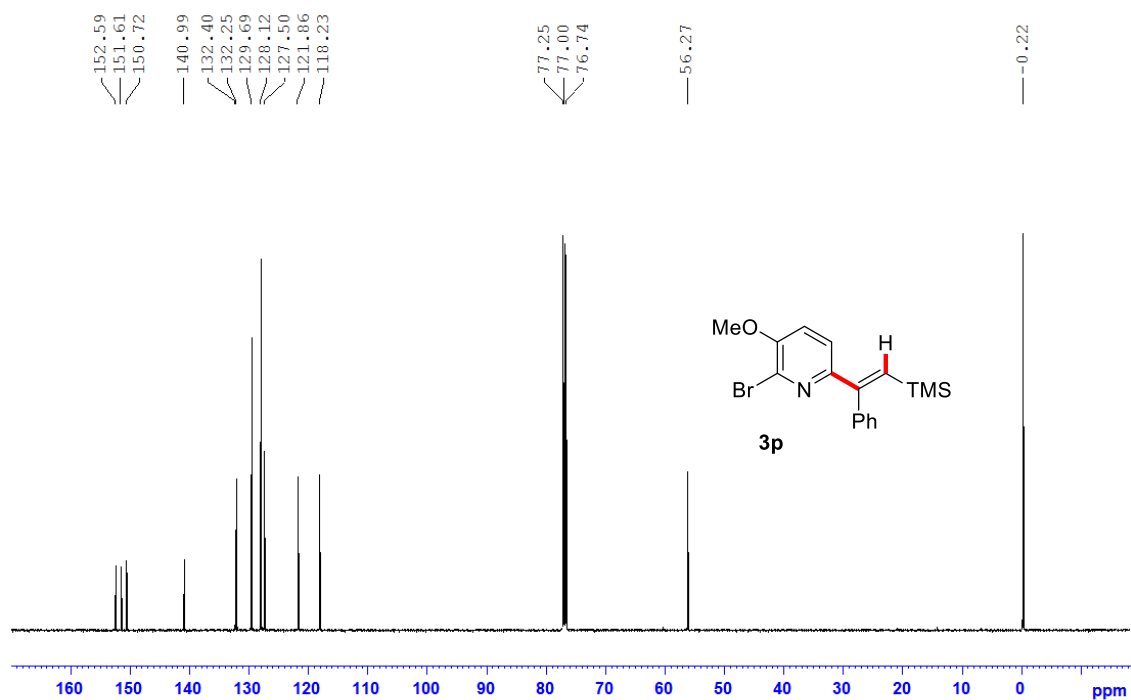

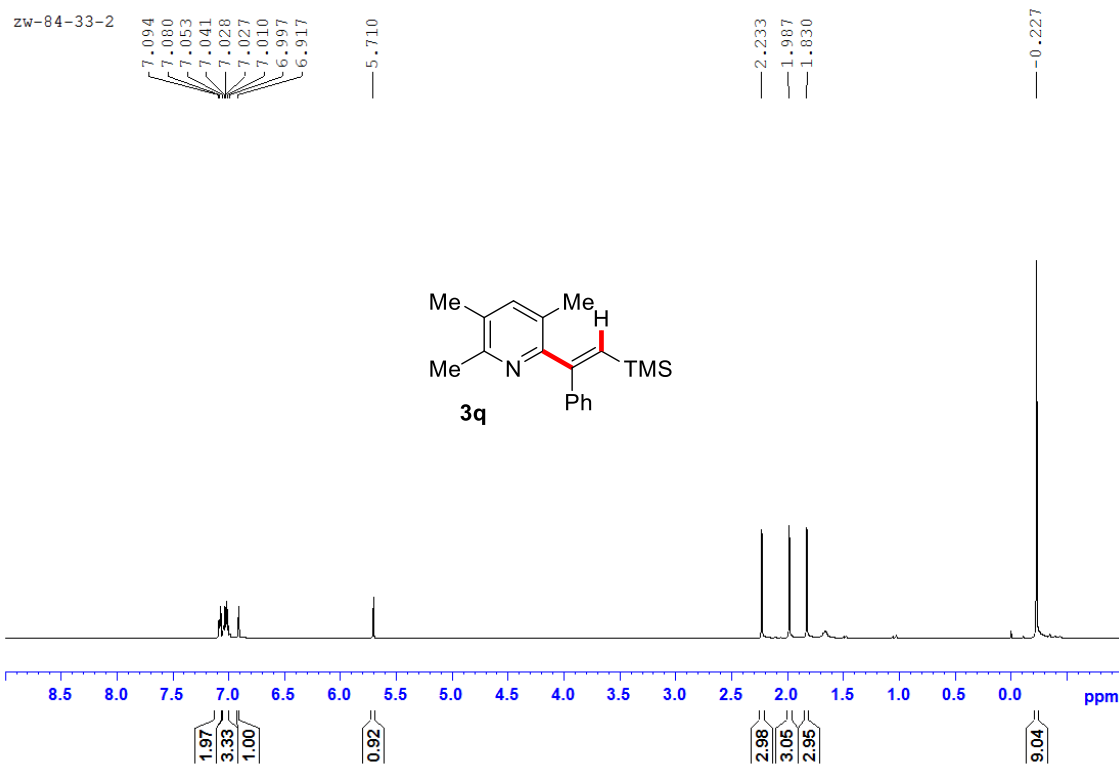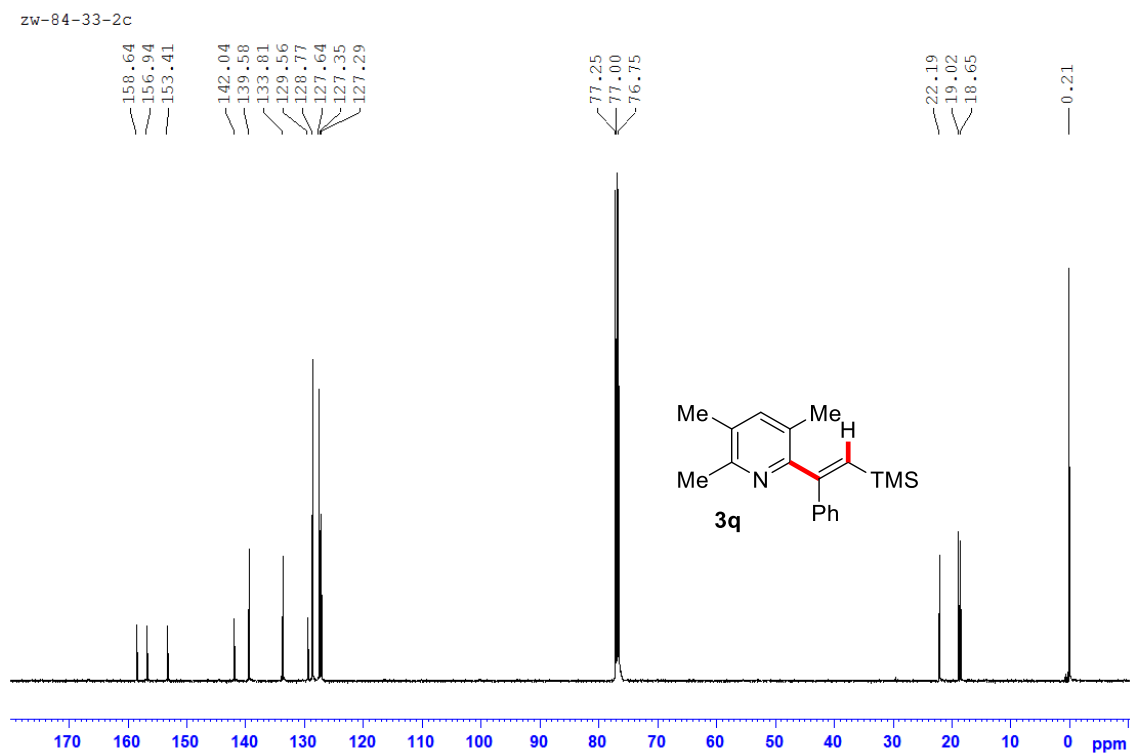

zw-84-25-1

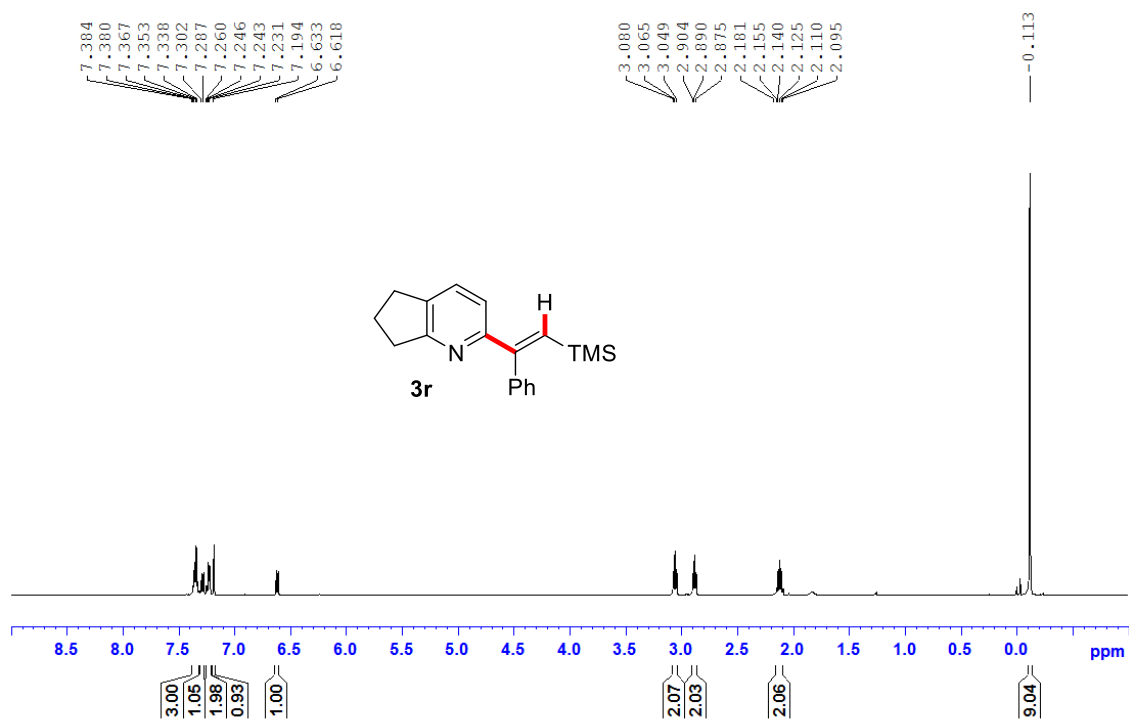

zw-84-25-1c

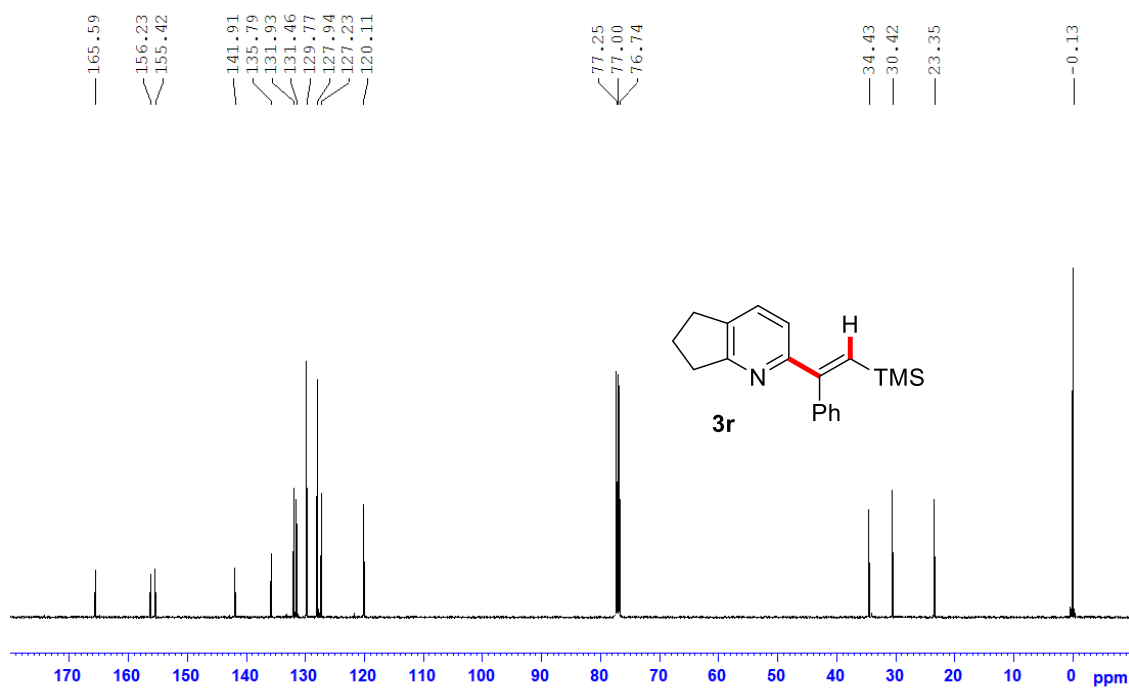

zw-84-25-2

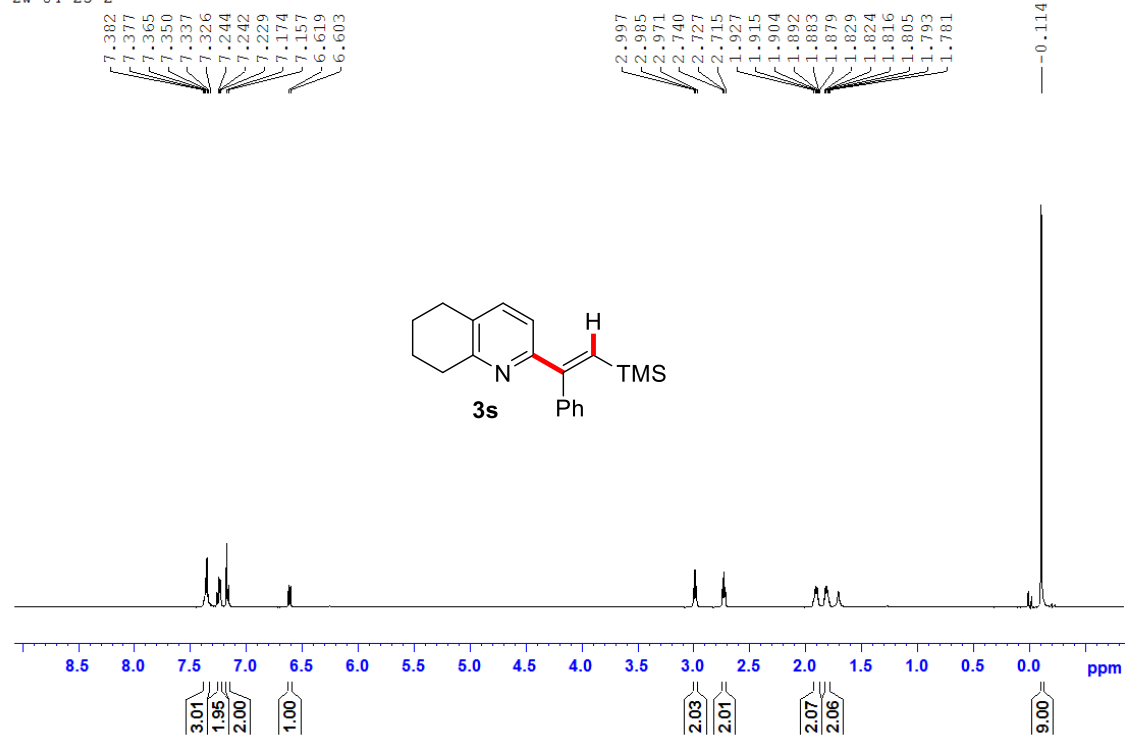

zw-84-25-2c

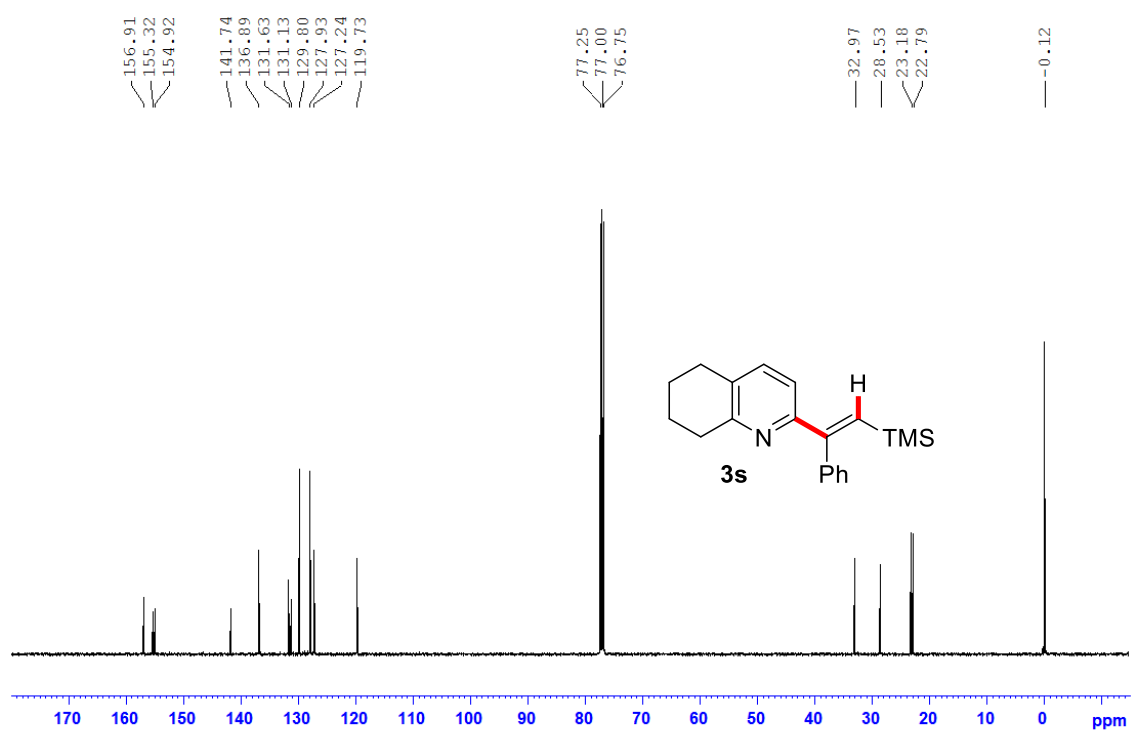

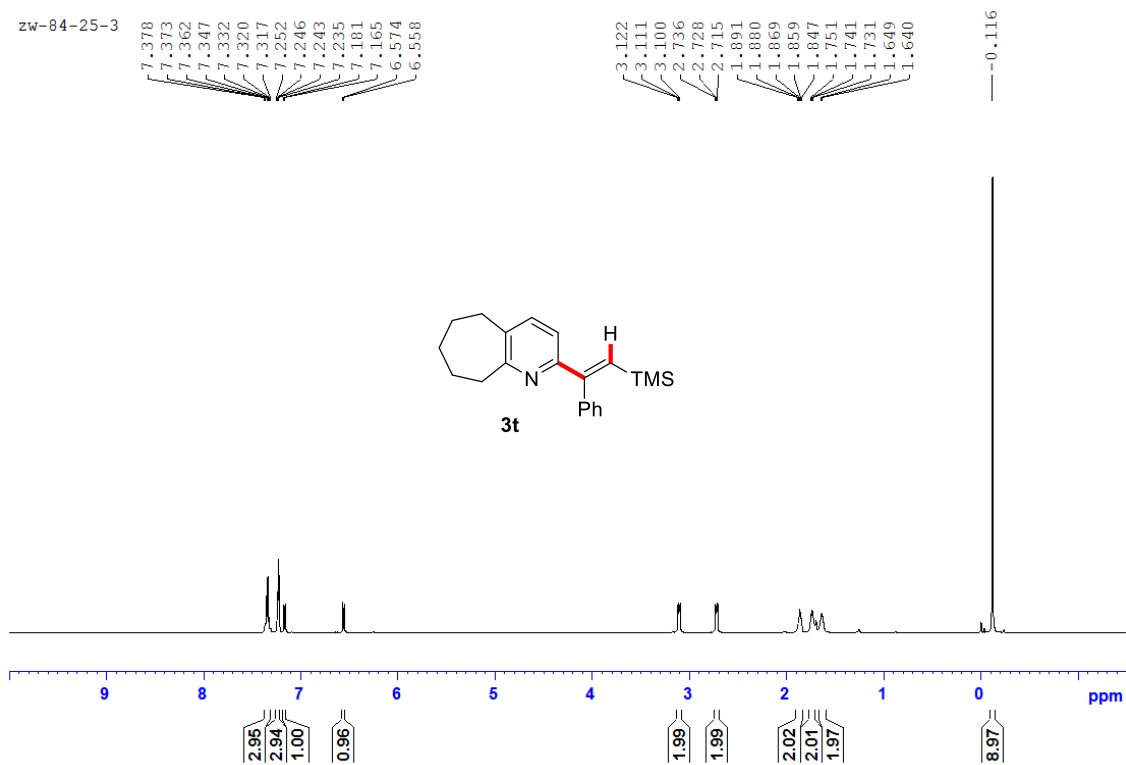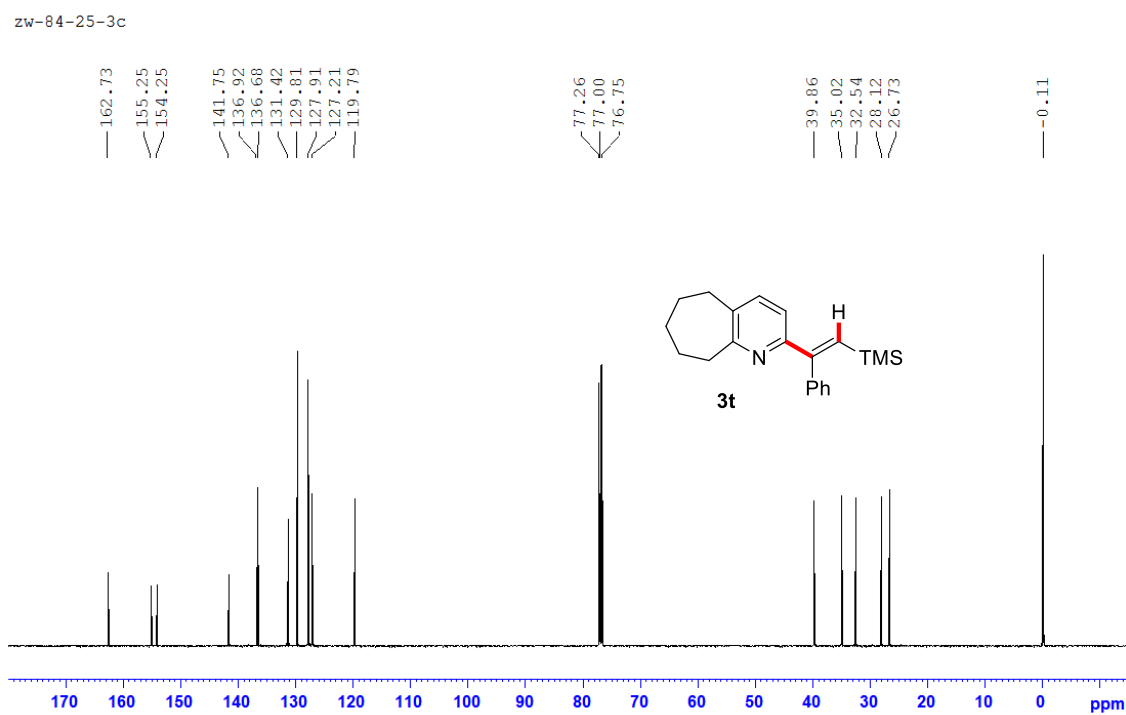

zw-84-30-2

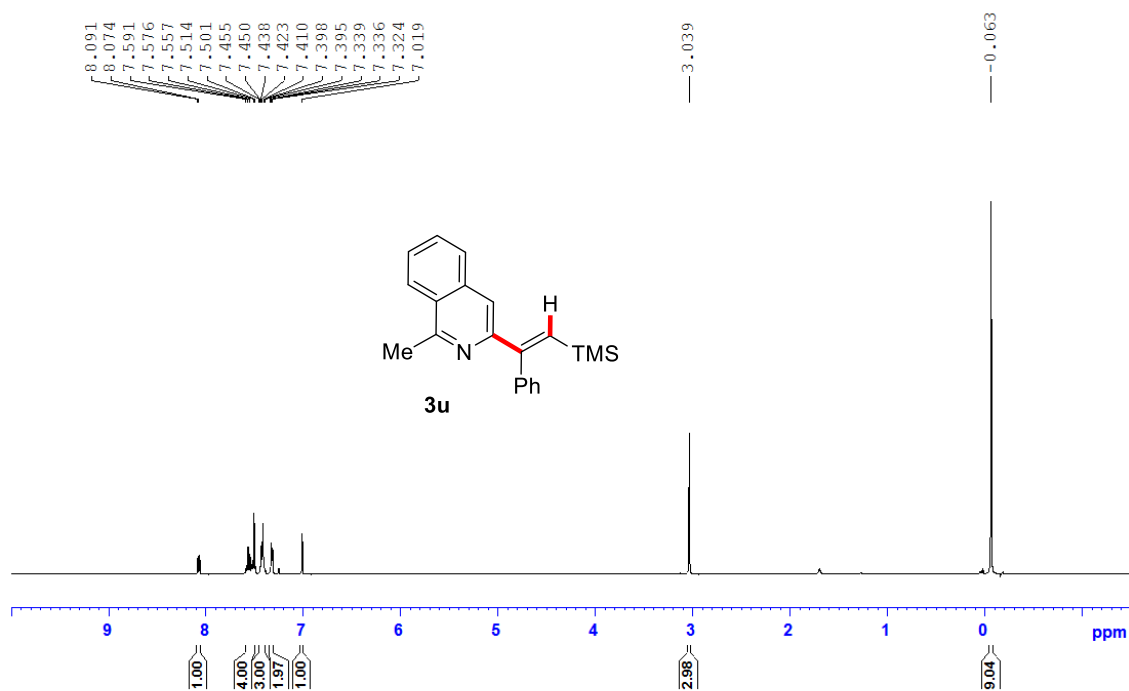

zw-84-30-2c

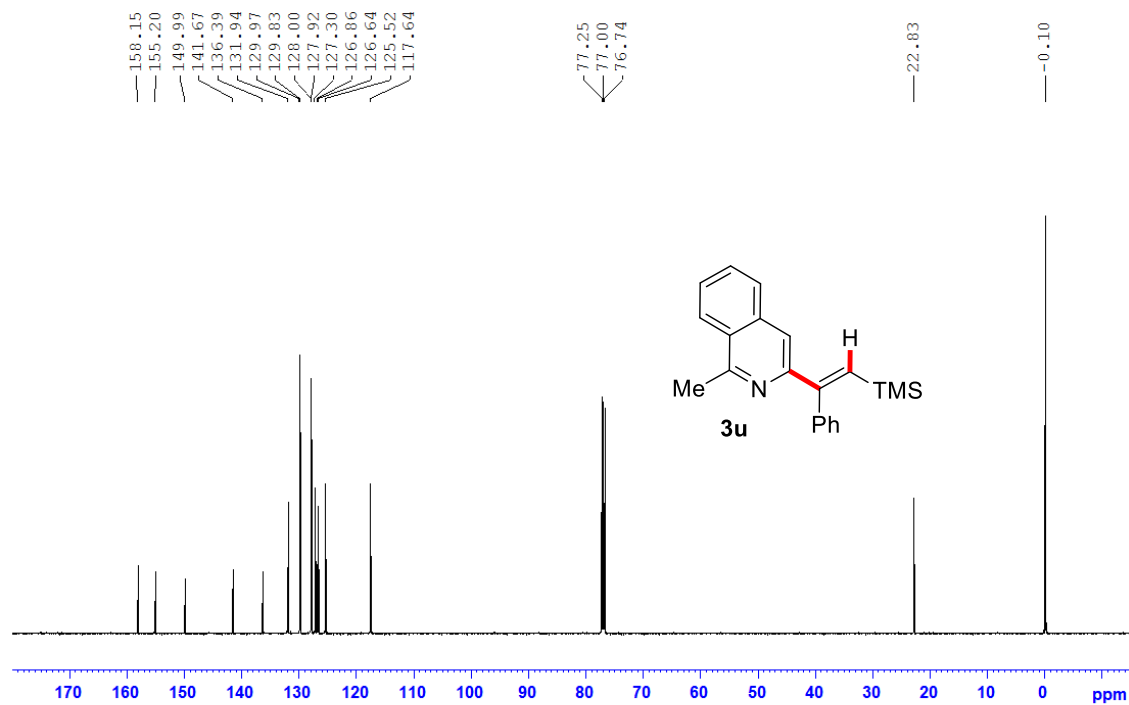

zw-84-30-3

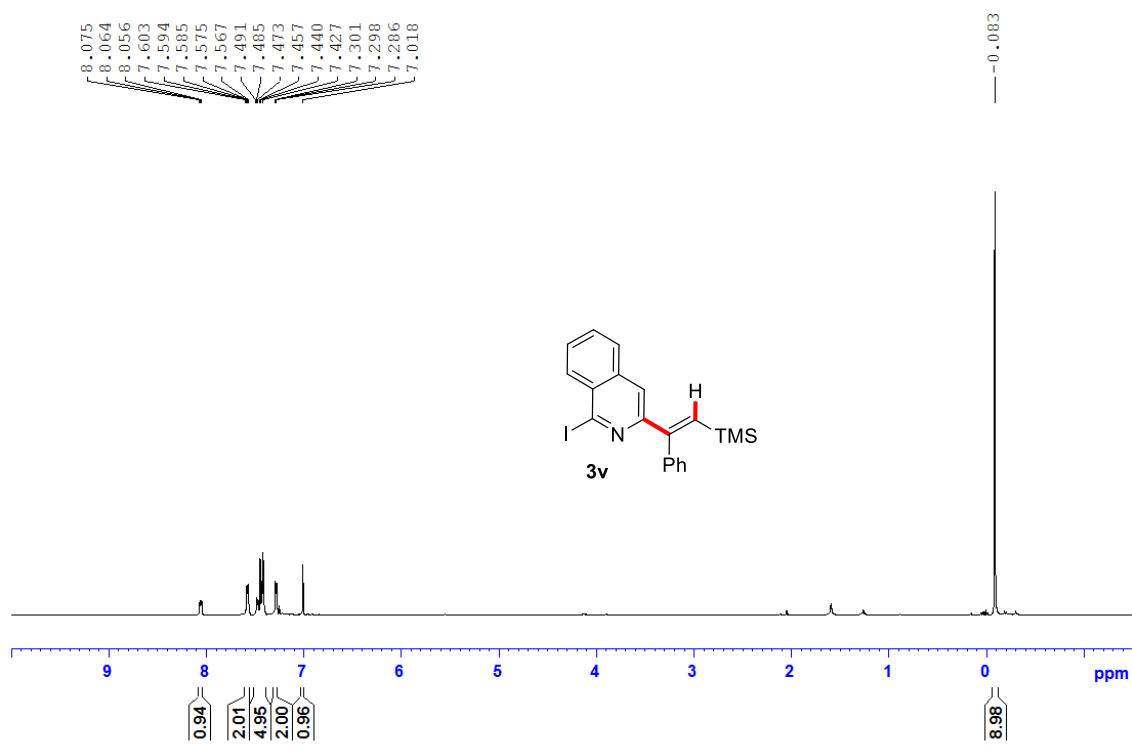

zw-84-30-3c

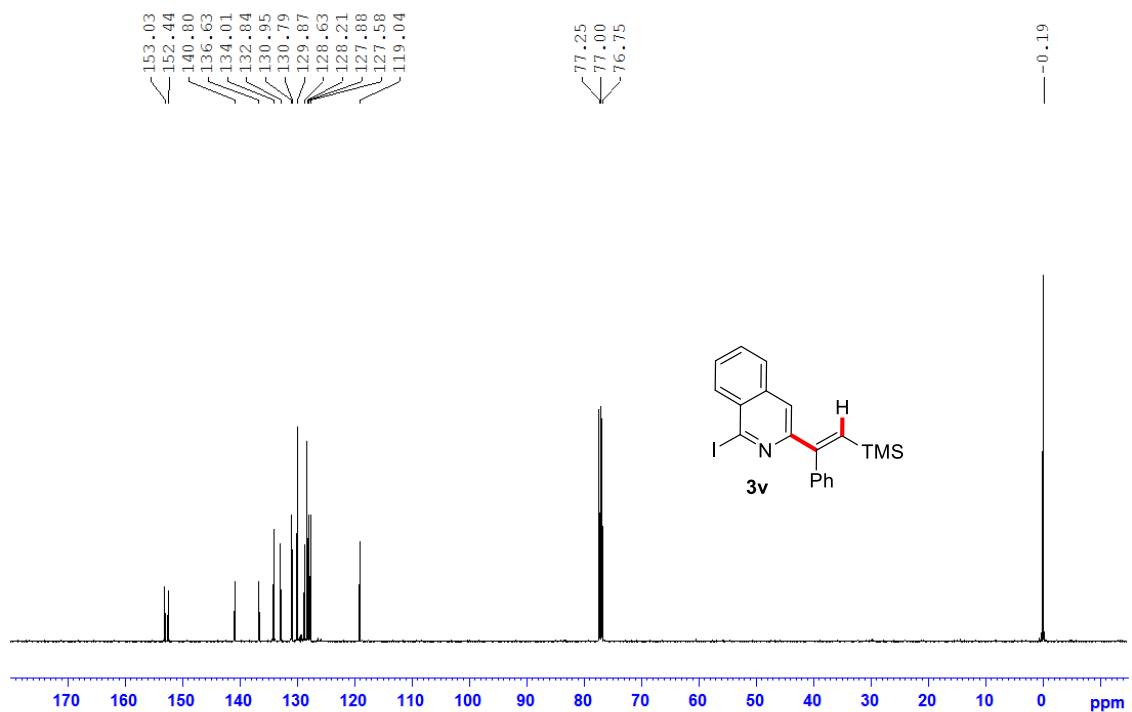

zw-84-20-2

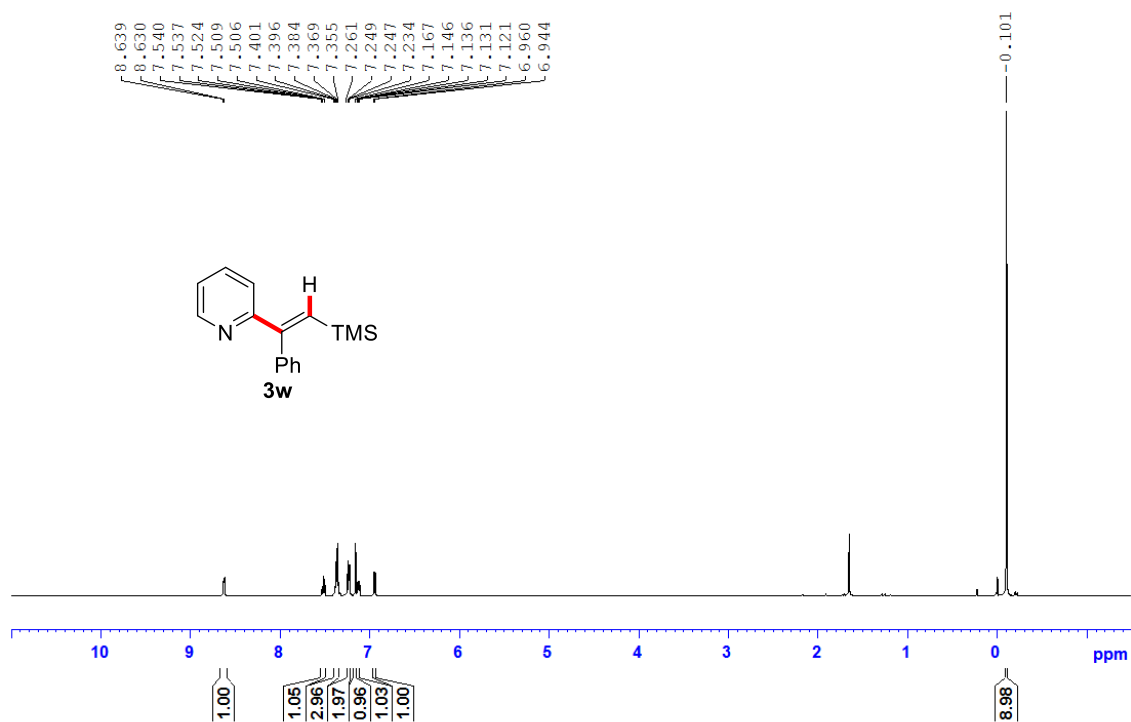

zw-84-20-2c

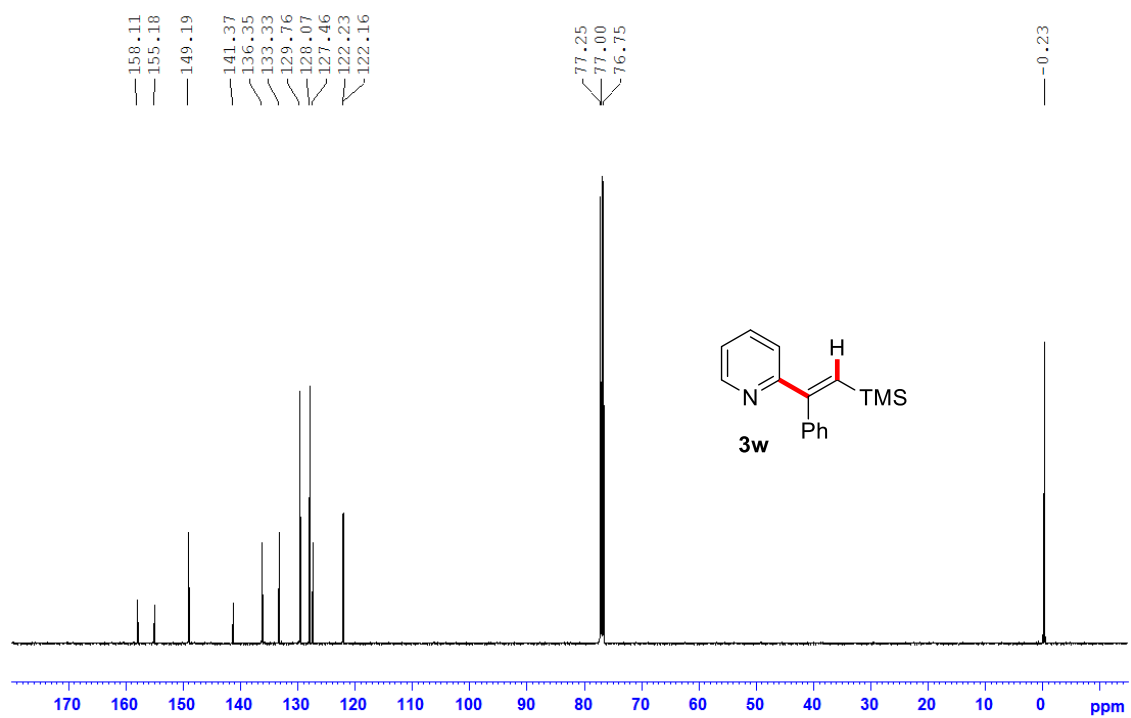

zw-84-28-1

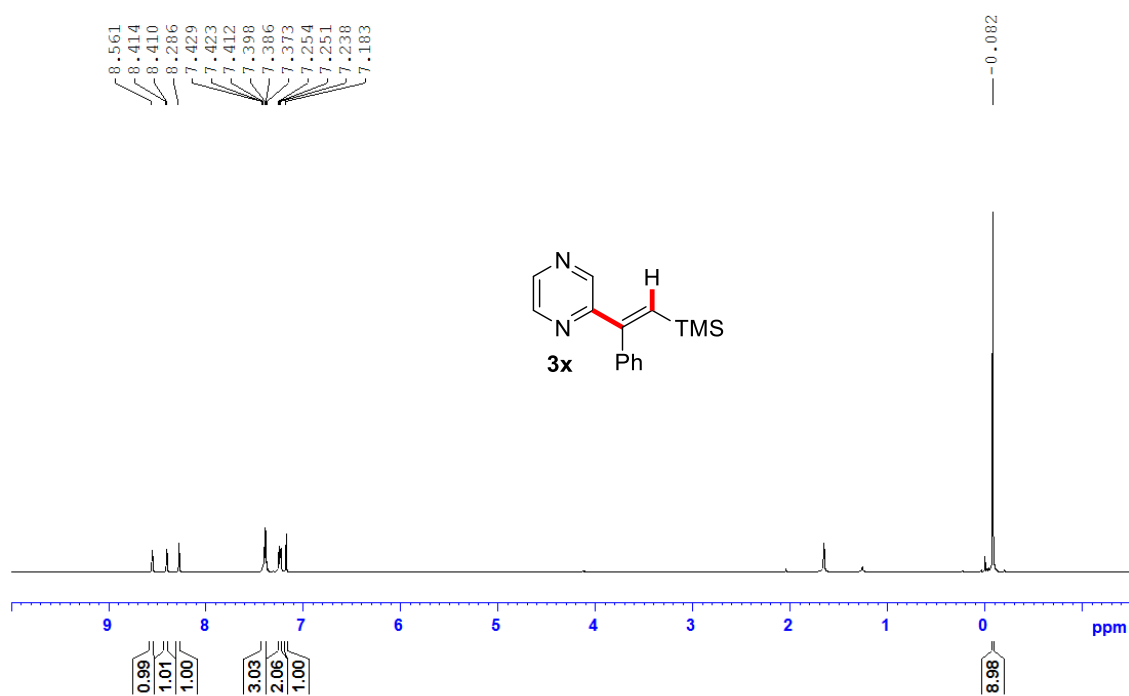

zw-84-28-1c

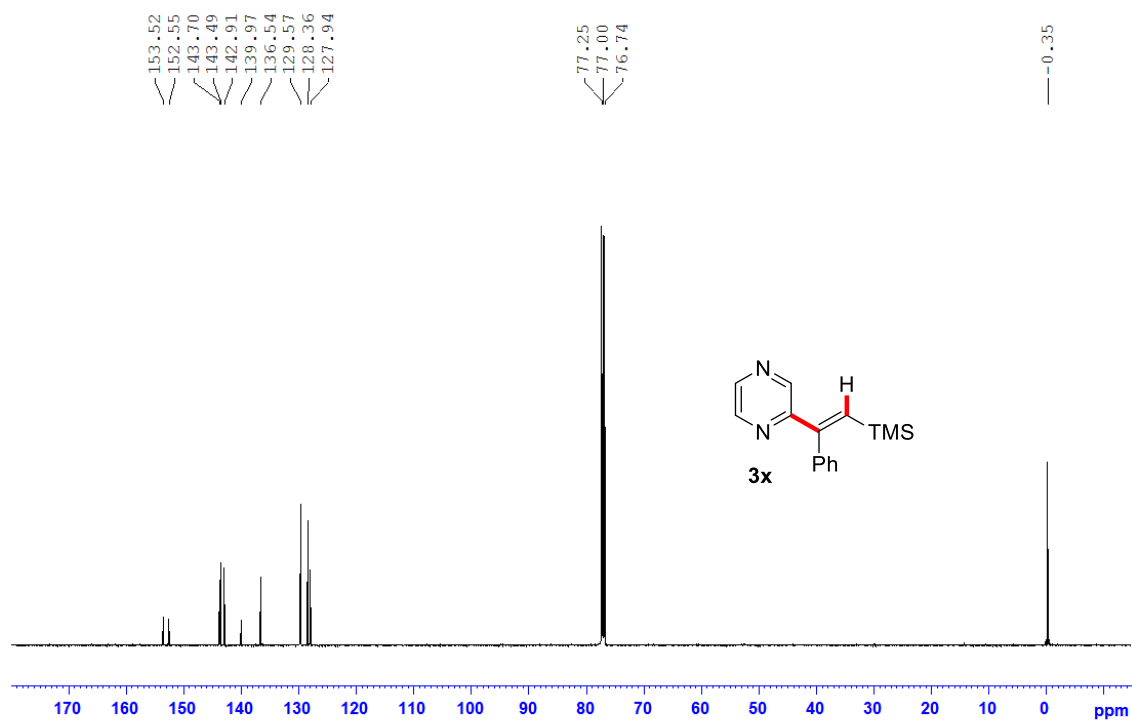

zw-84-30-1

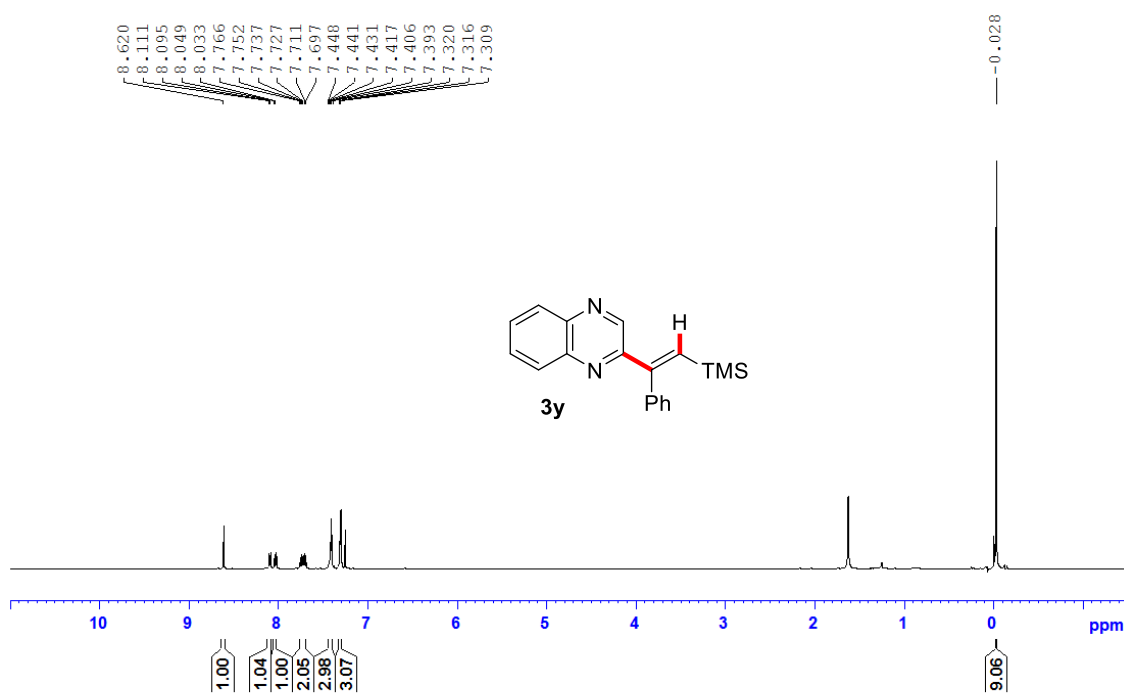

zw-84-30-1c

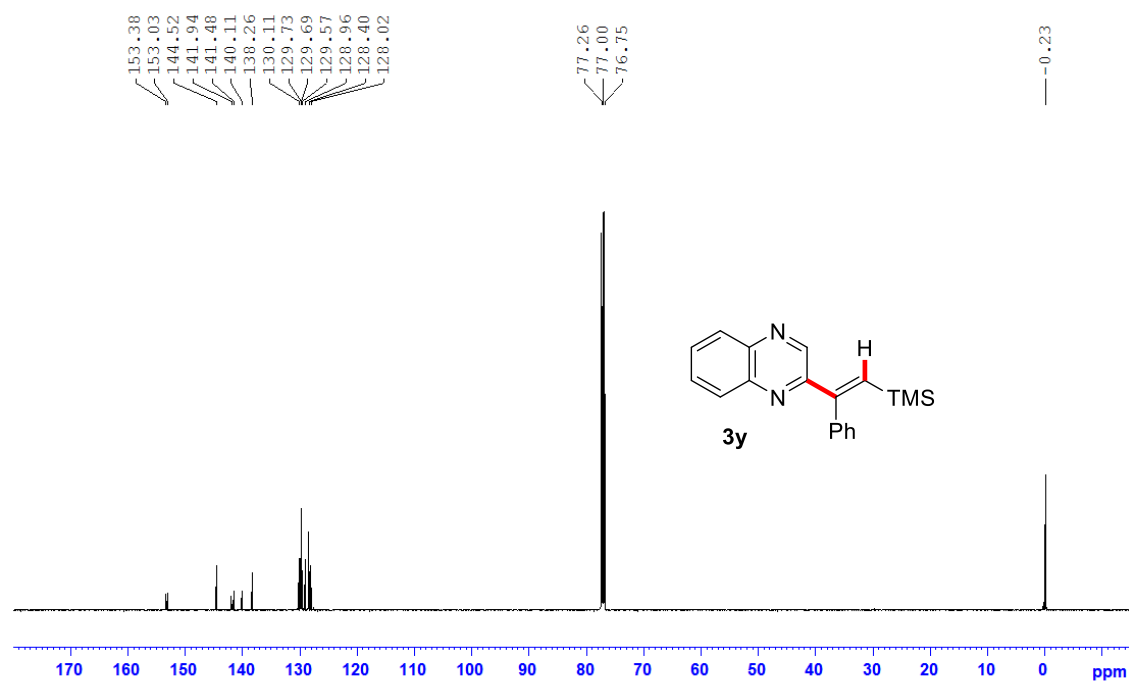

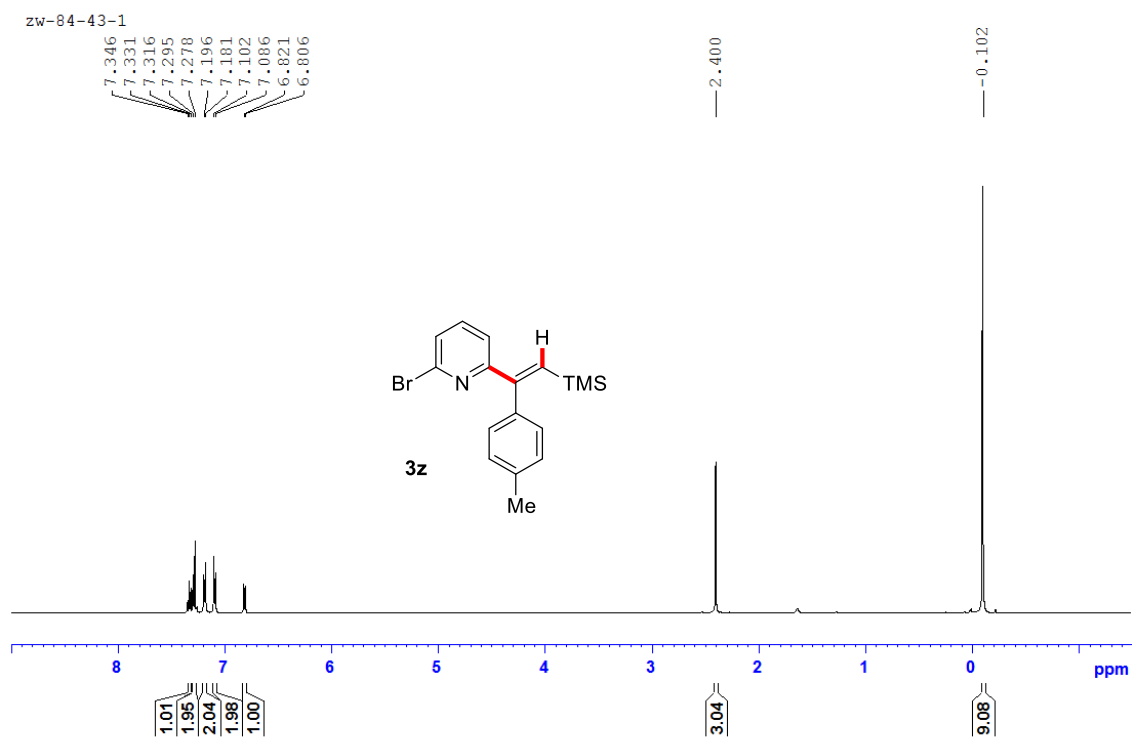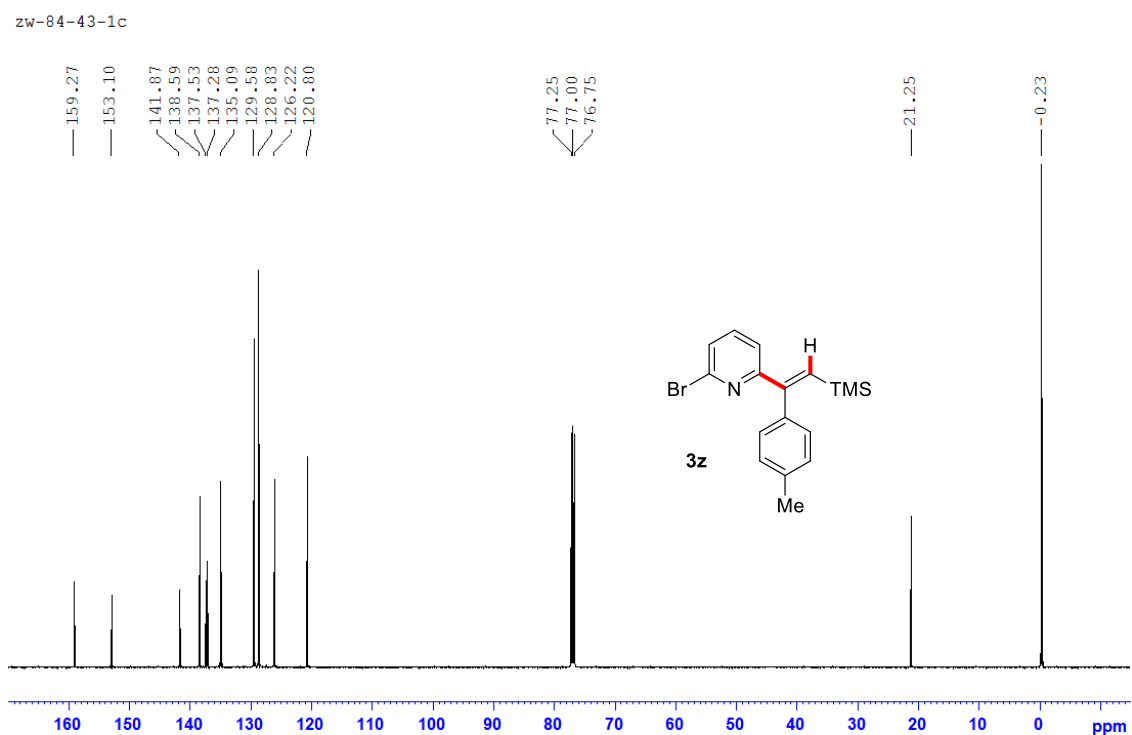

zw-84-43-2

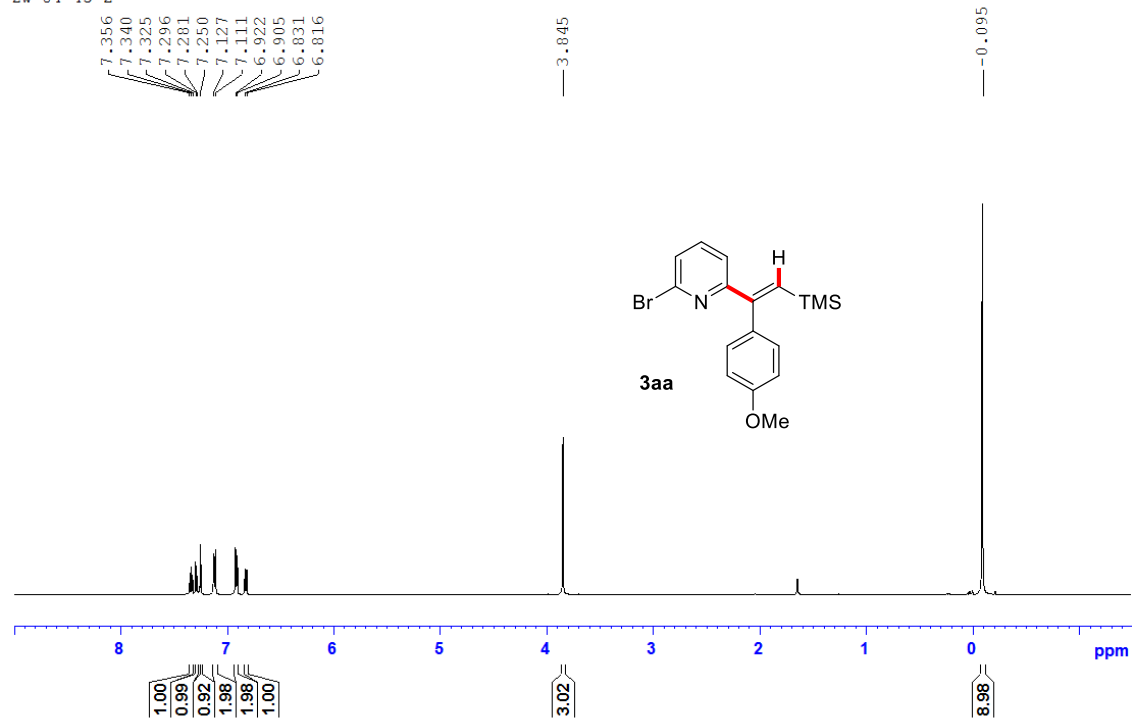

zw-84-43-2c

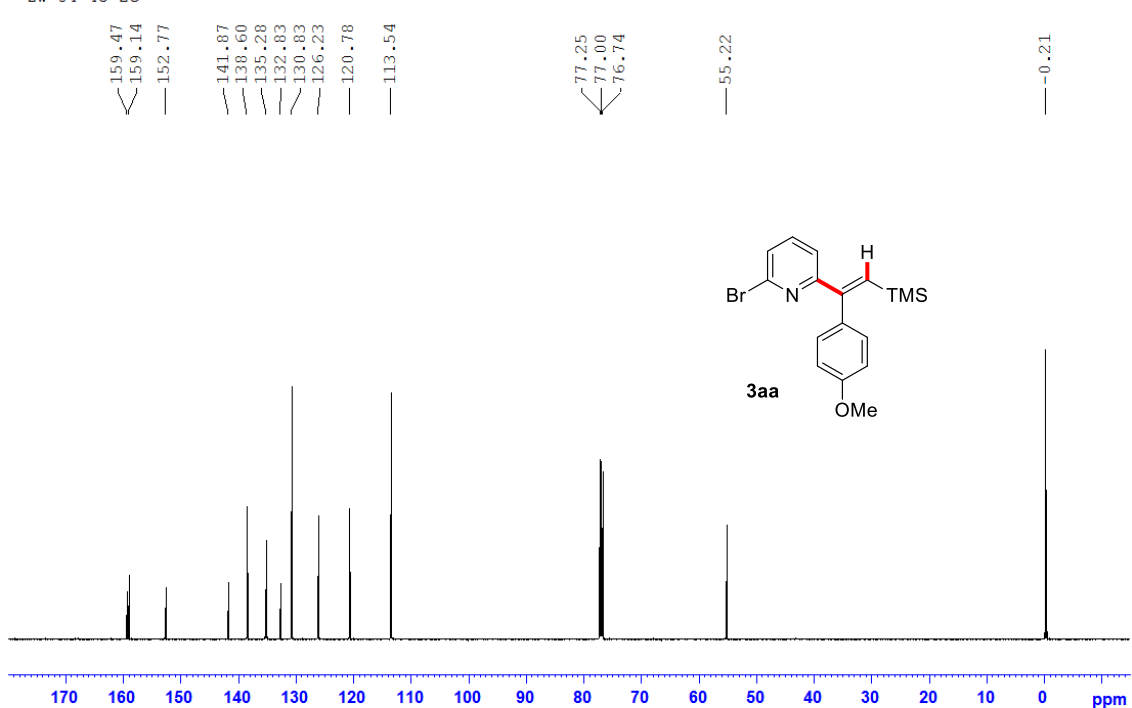

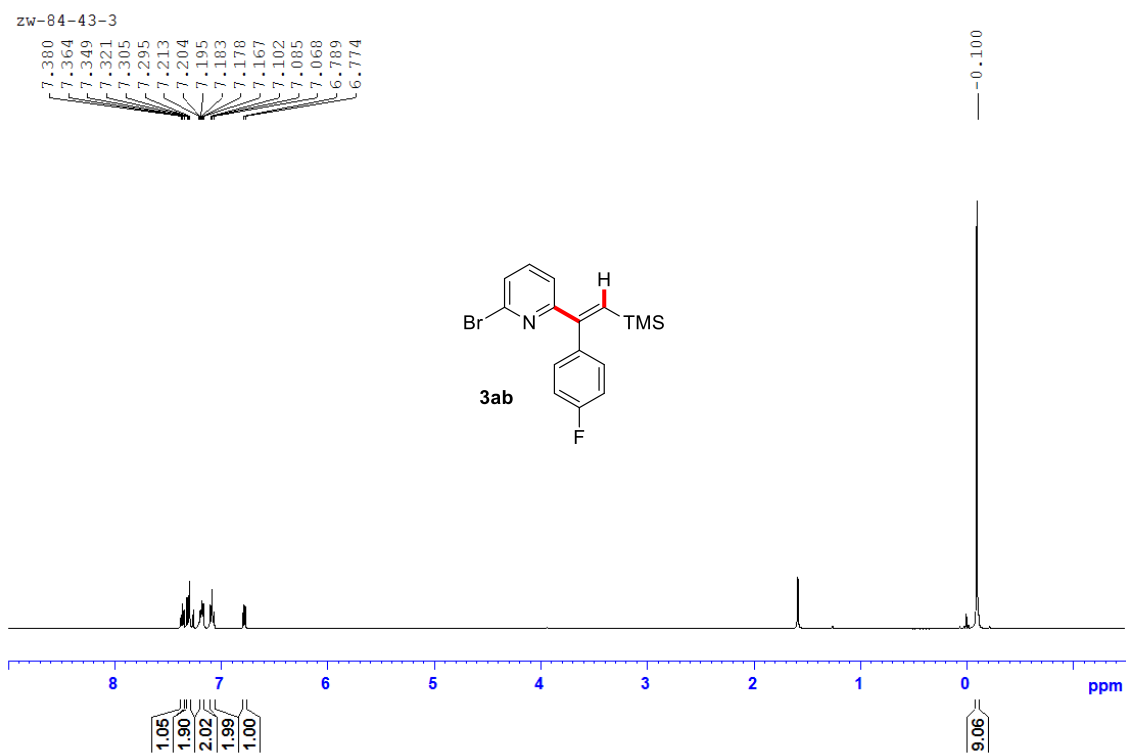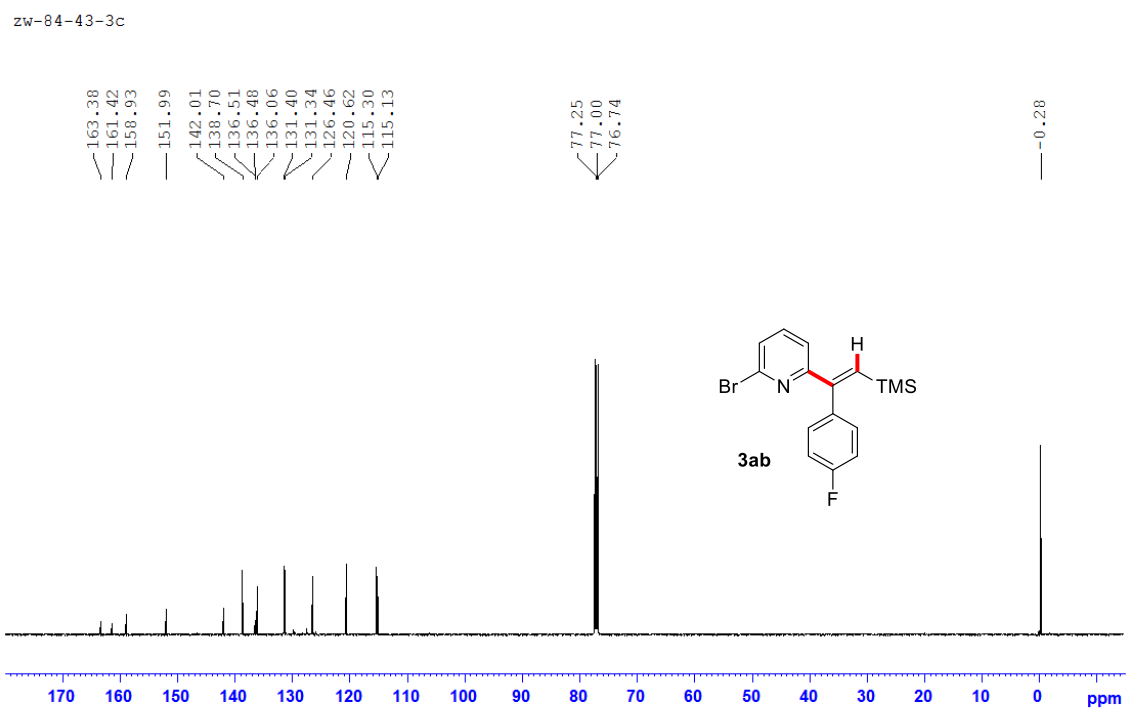

zw-84-43-4

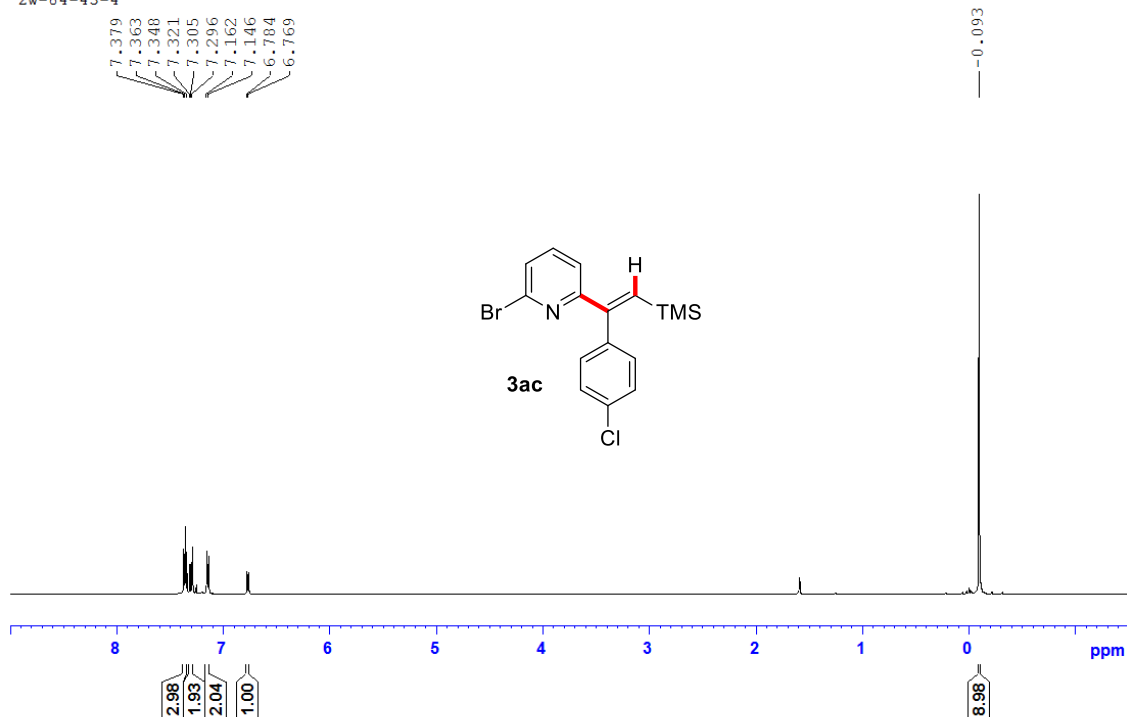

zw-84-43-4c

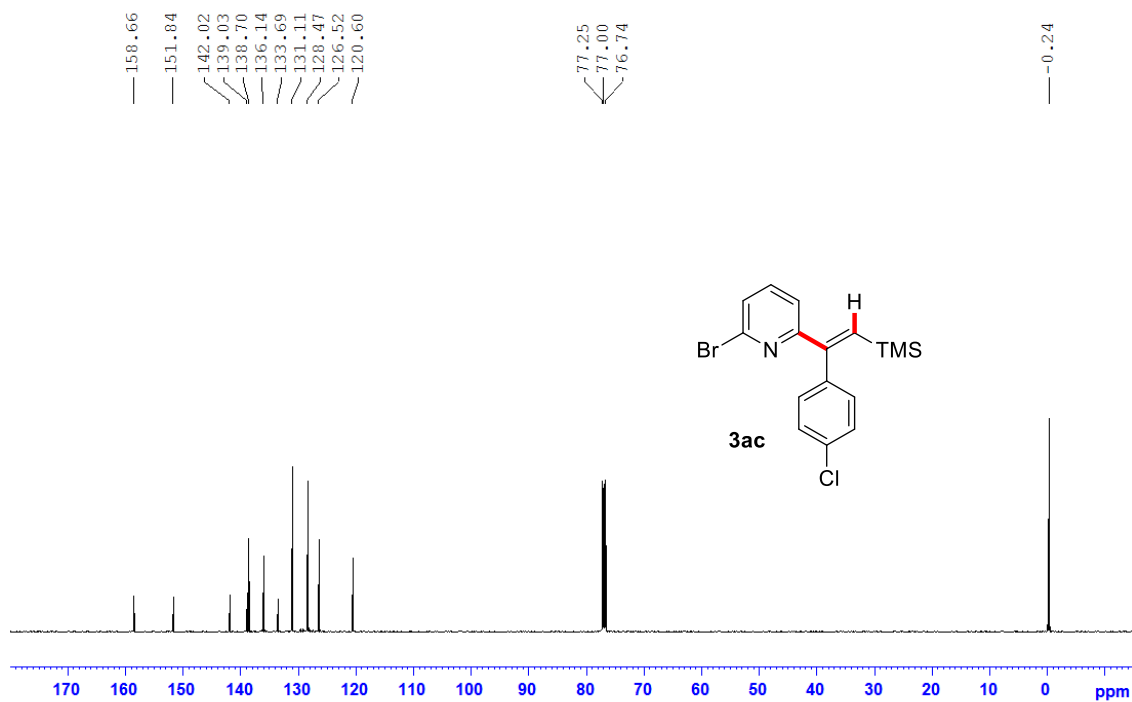

zw-84-44-1

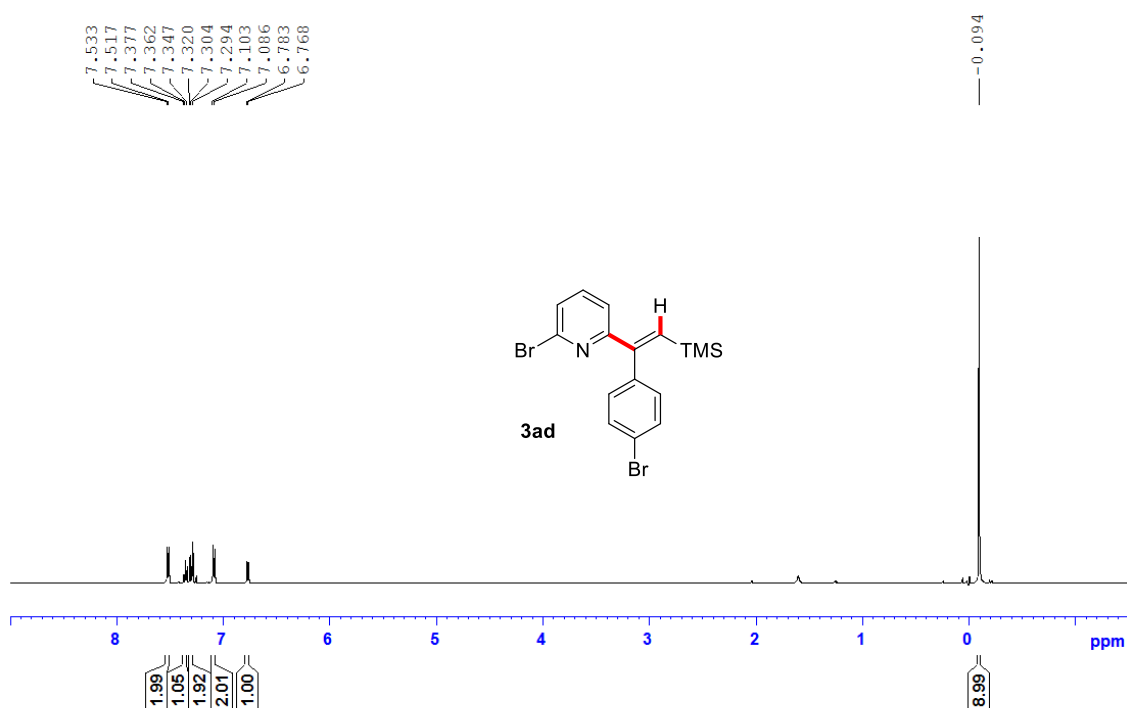

zw-84-44-1c

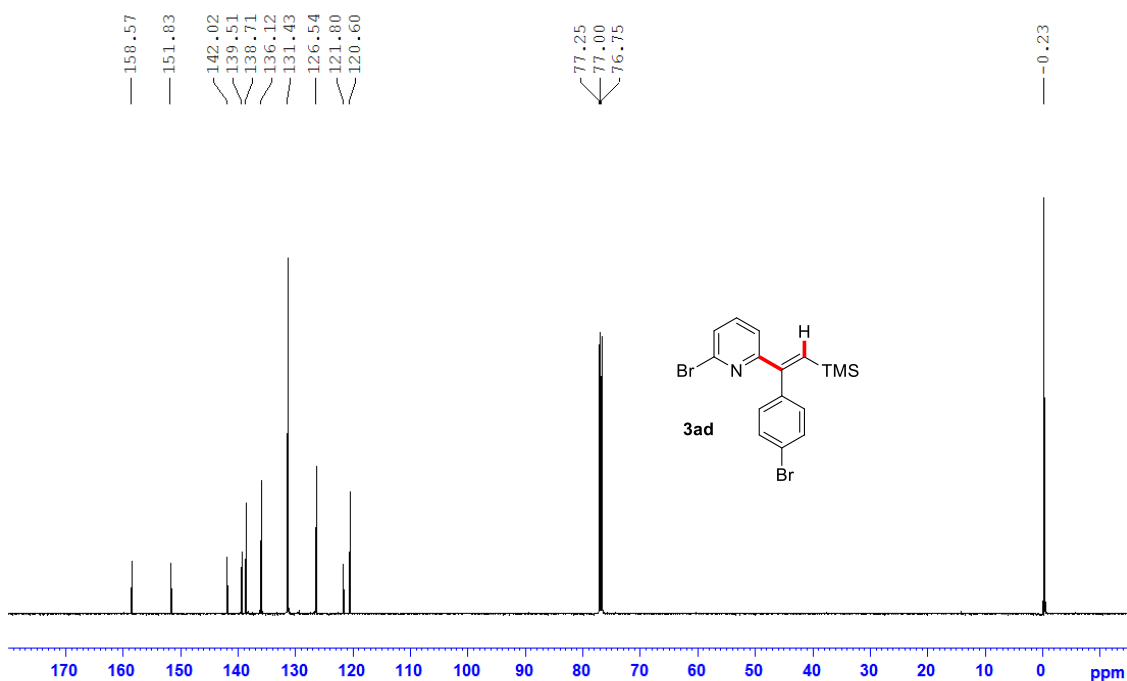

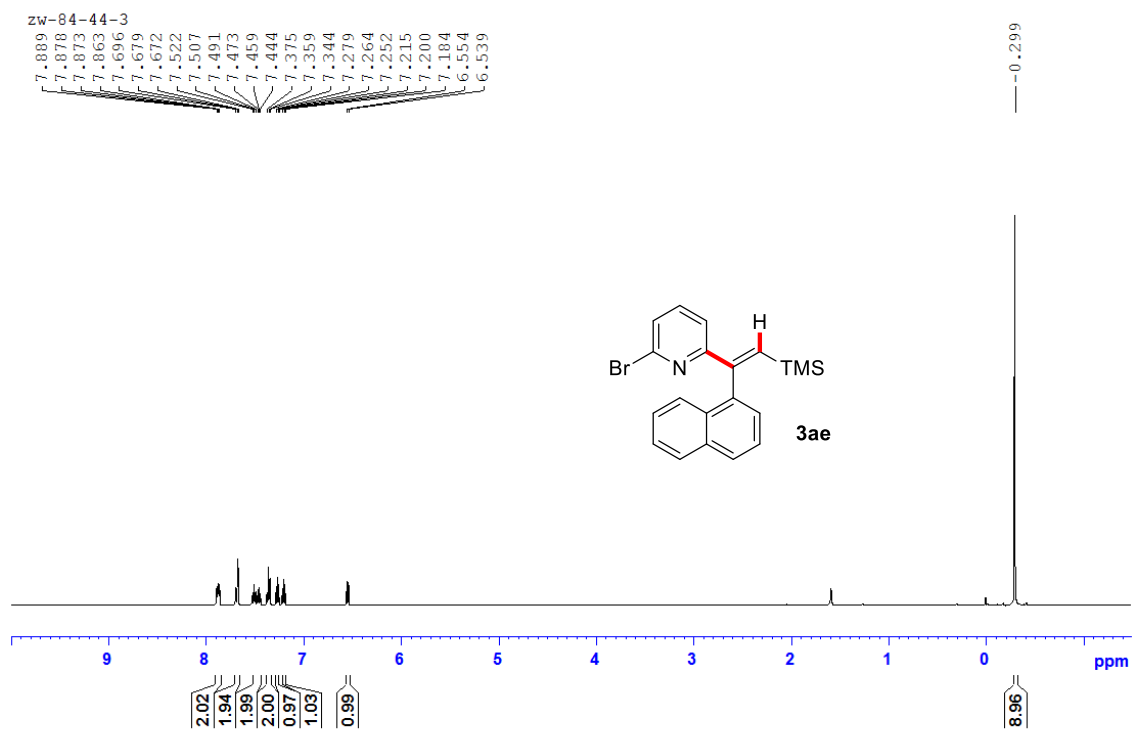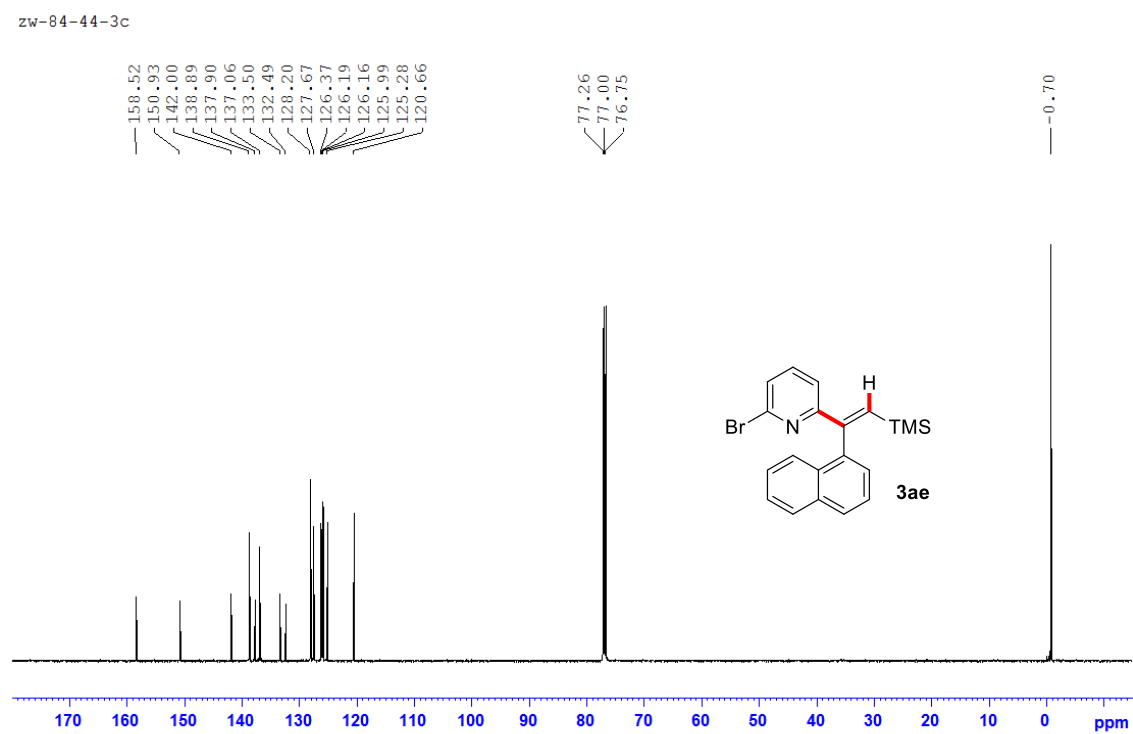

zw-84-44-4

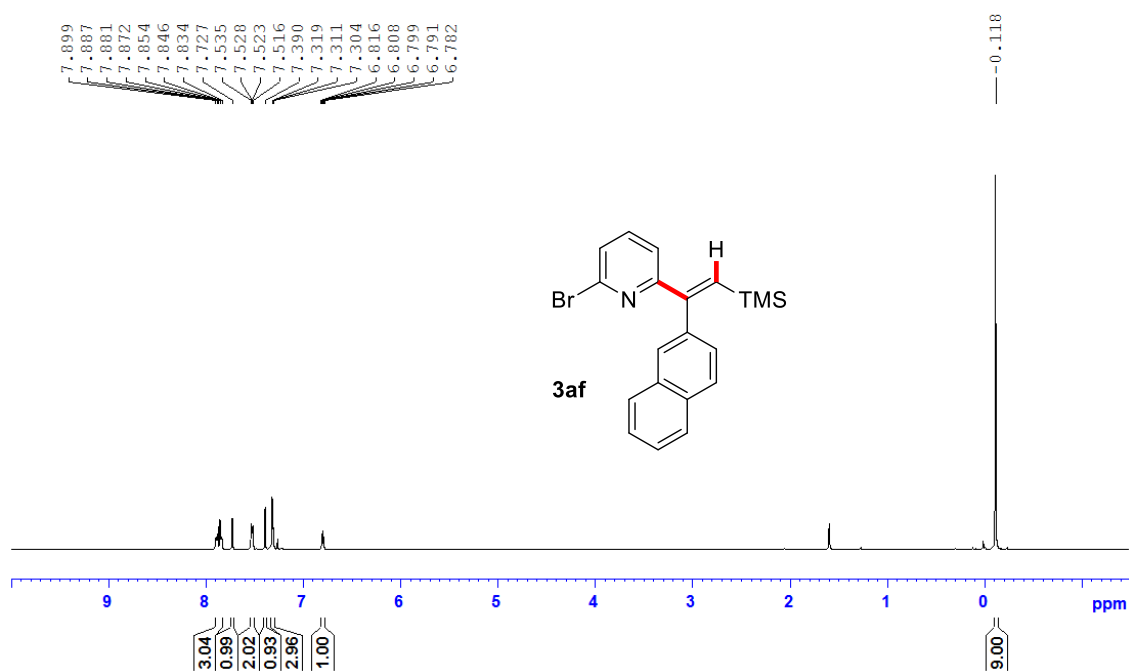

zw-84-44-4c

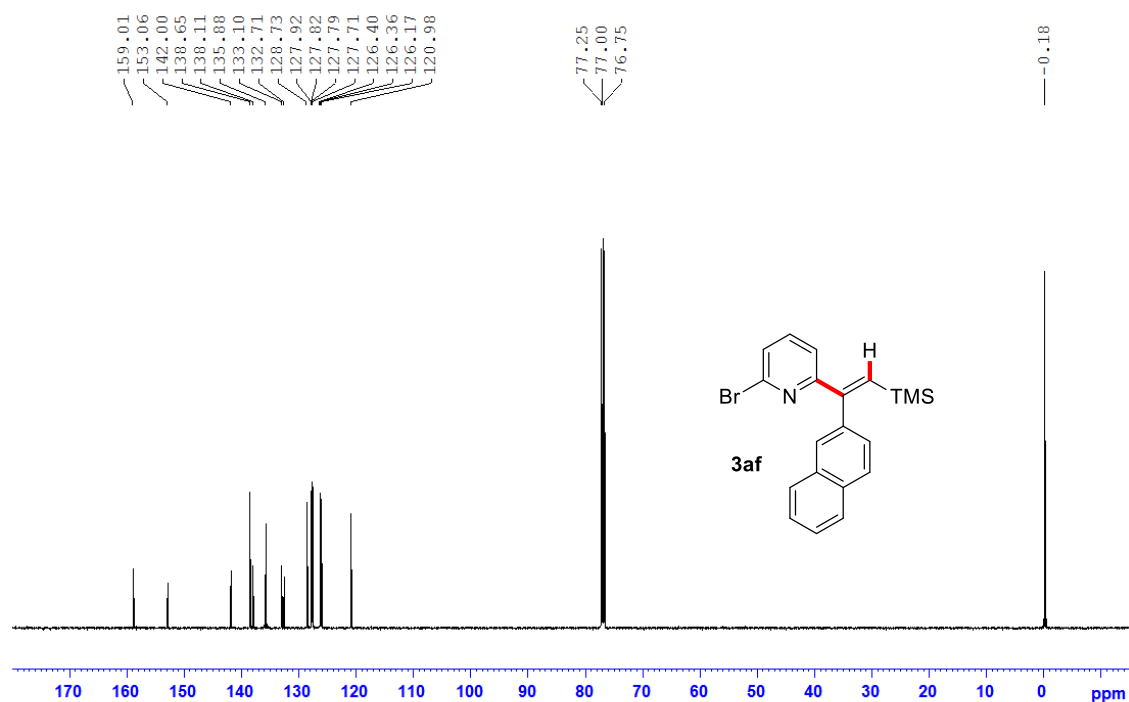

zw-84-58-2

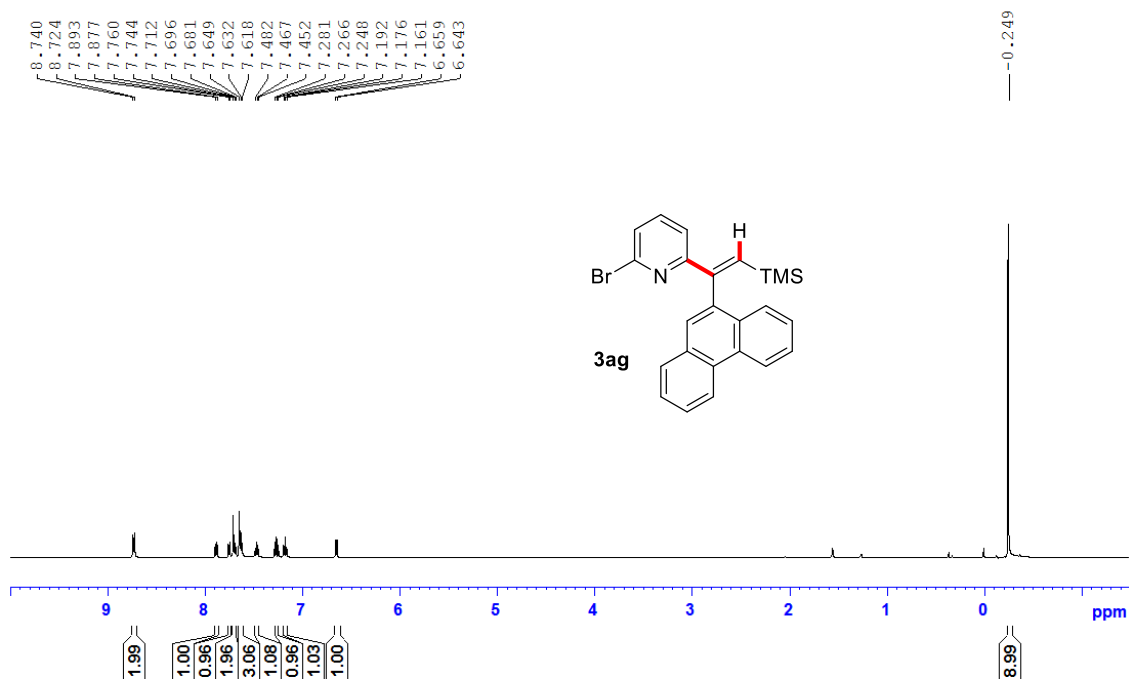

zw-84-58-2c

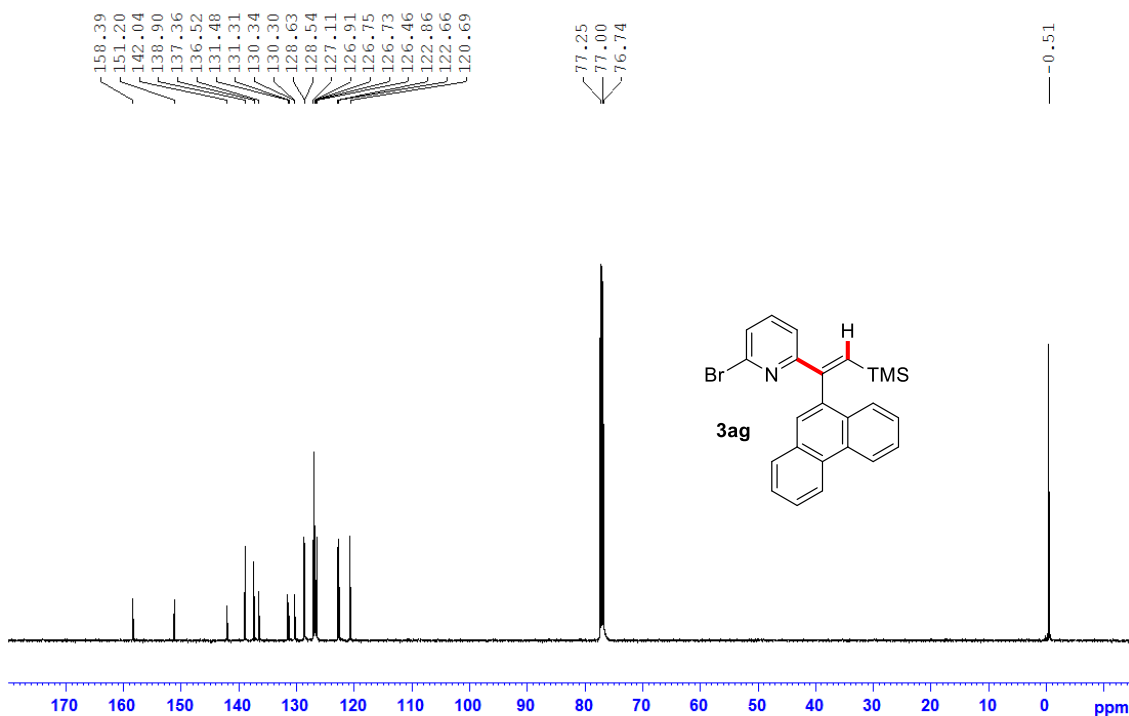

zw-84-58-1

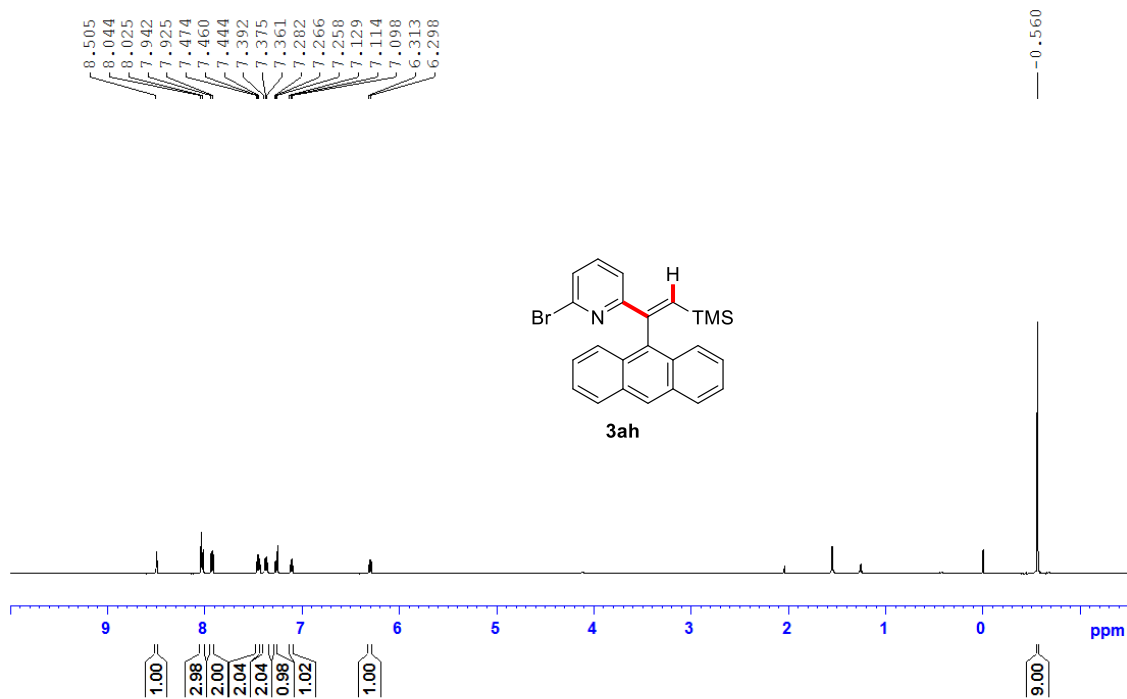

zw-84-58-1c

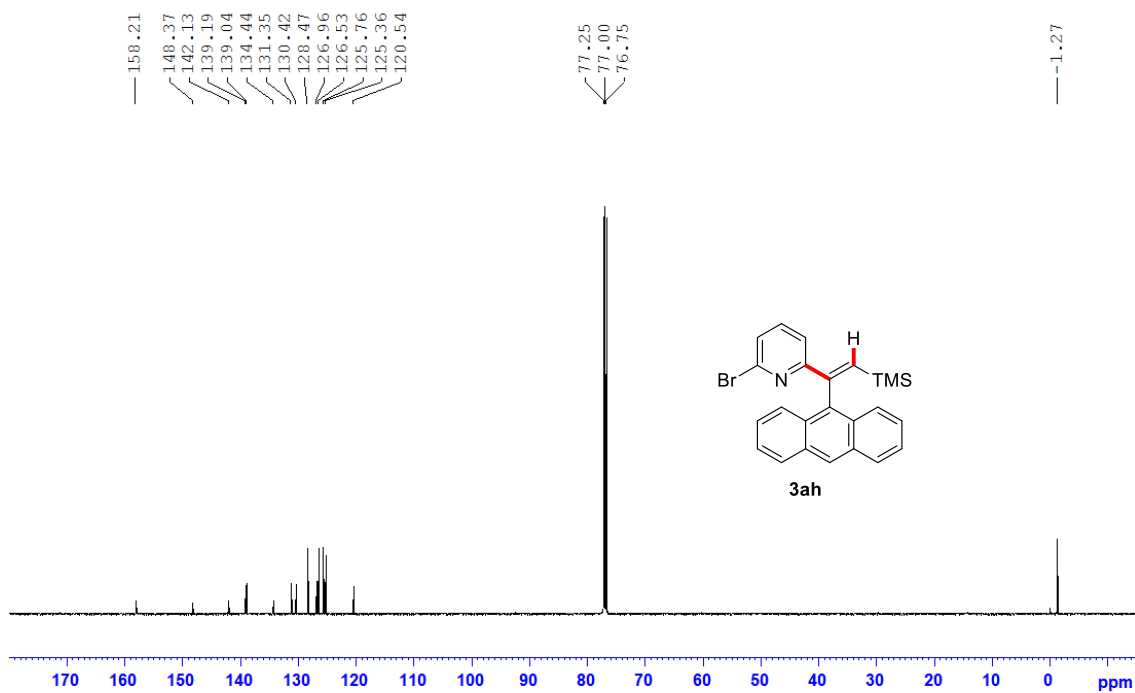

zw-84-54-3

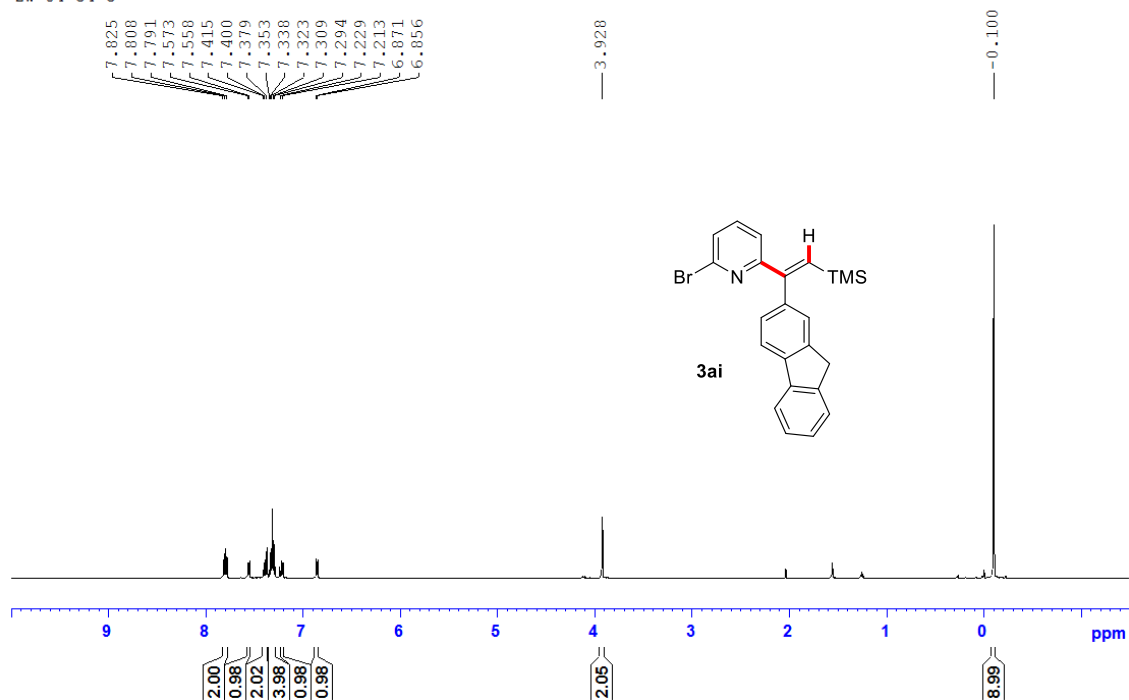

zw-84-54-3c

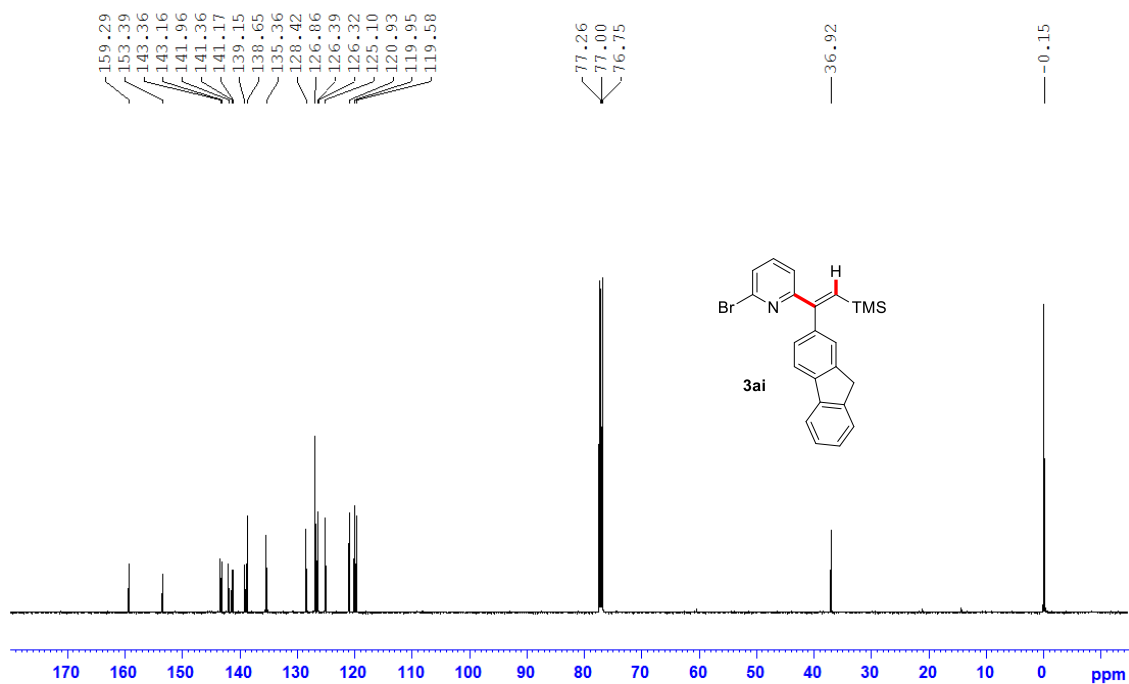

zw-84-54-4

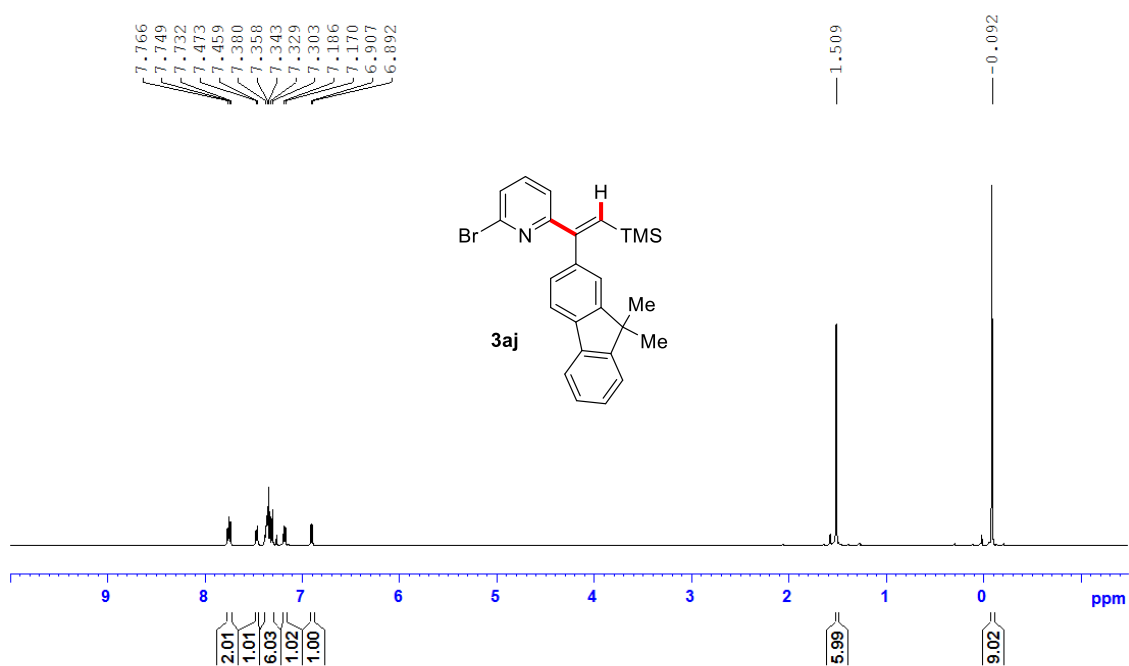

zw-84-54-4c

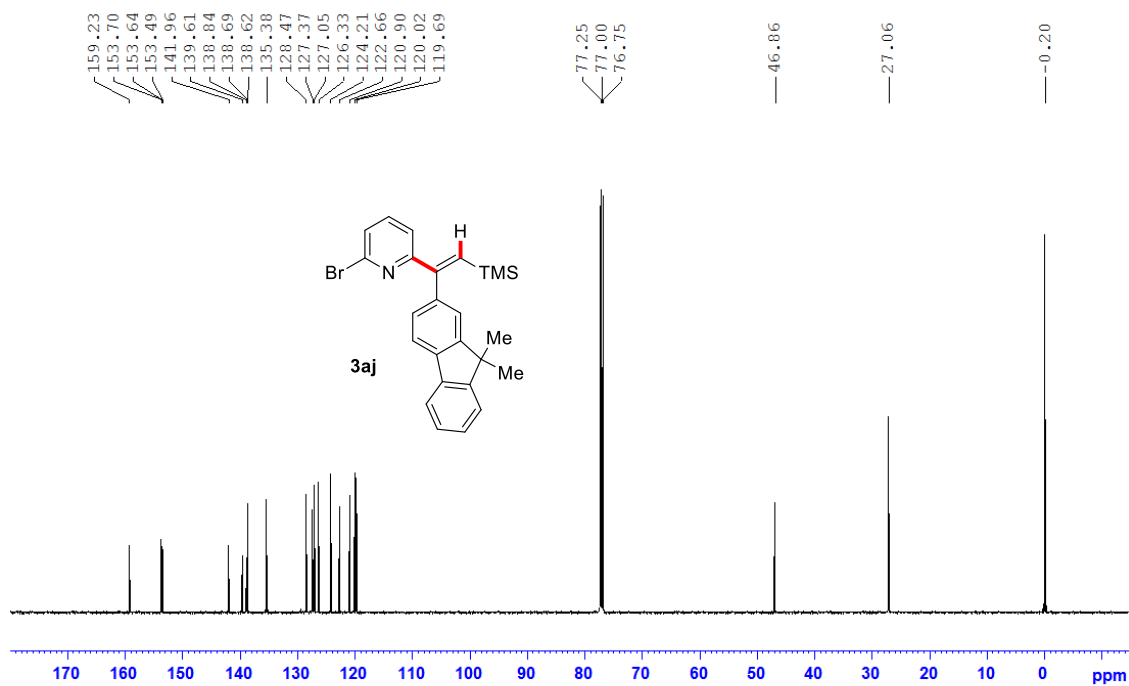

zw-84-45-1

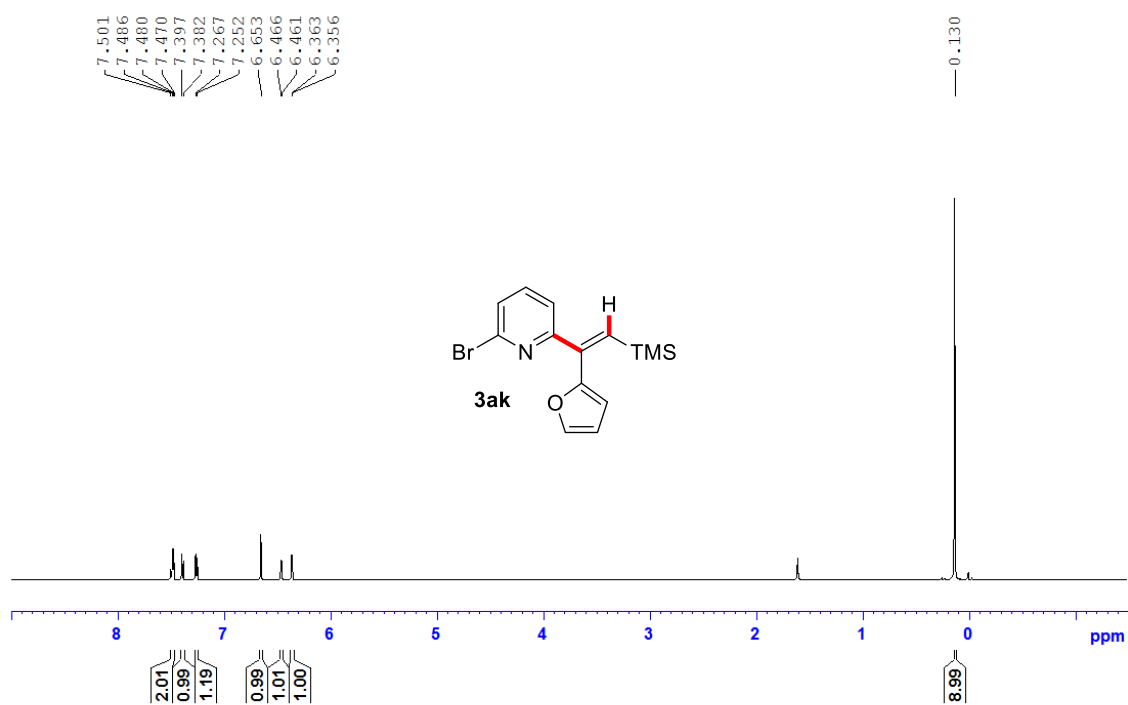

zw-84-45-1

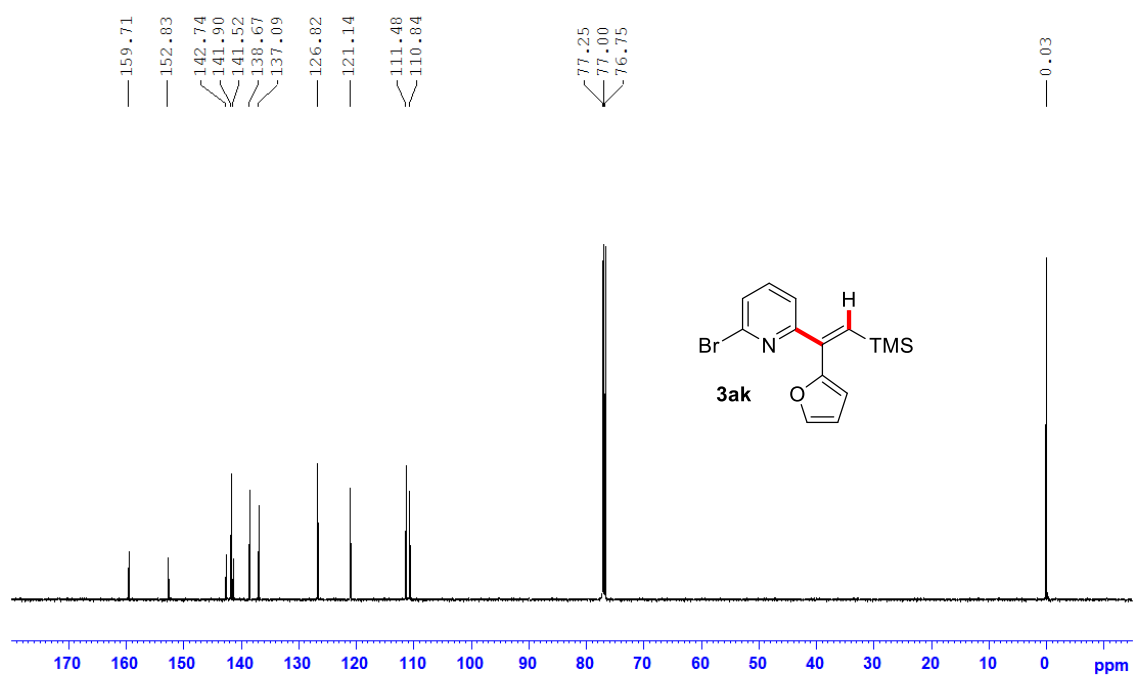

zw-84-45-2

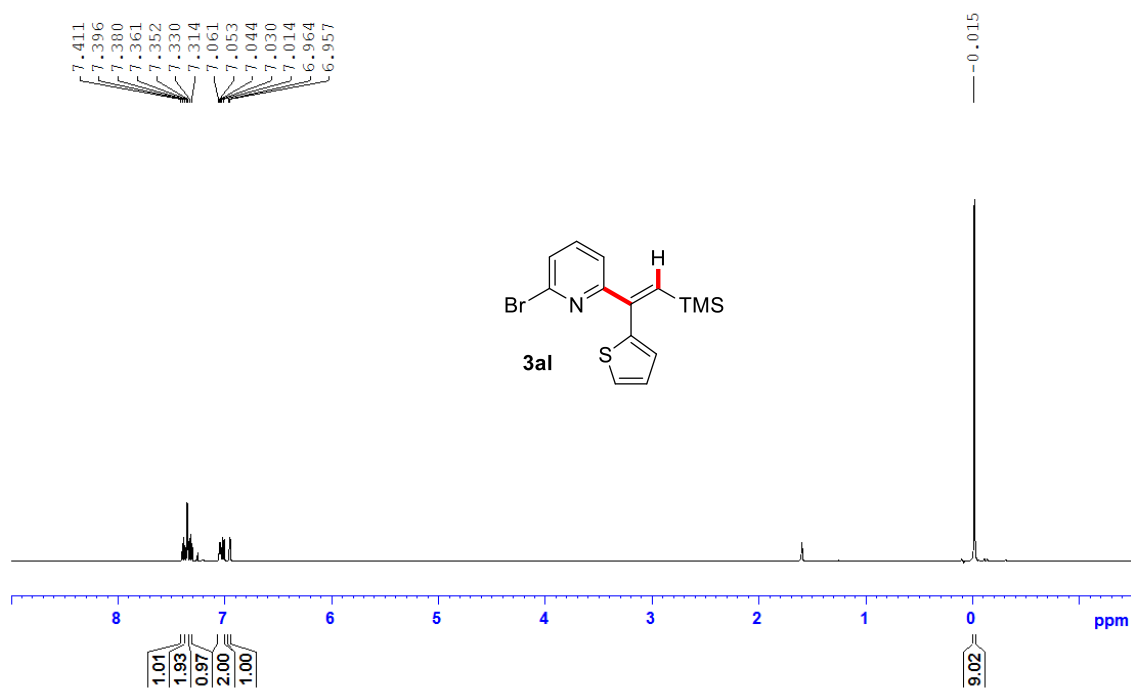

zw-84-45-2c

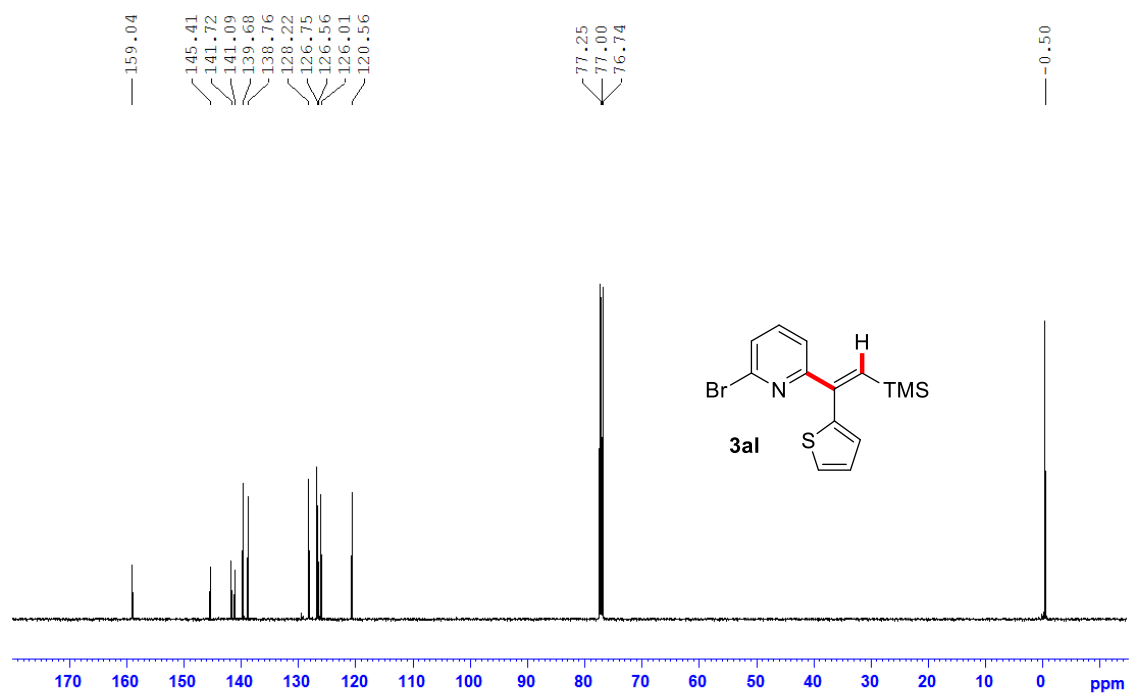

zw-84-54-1

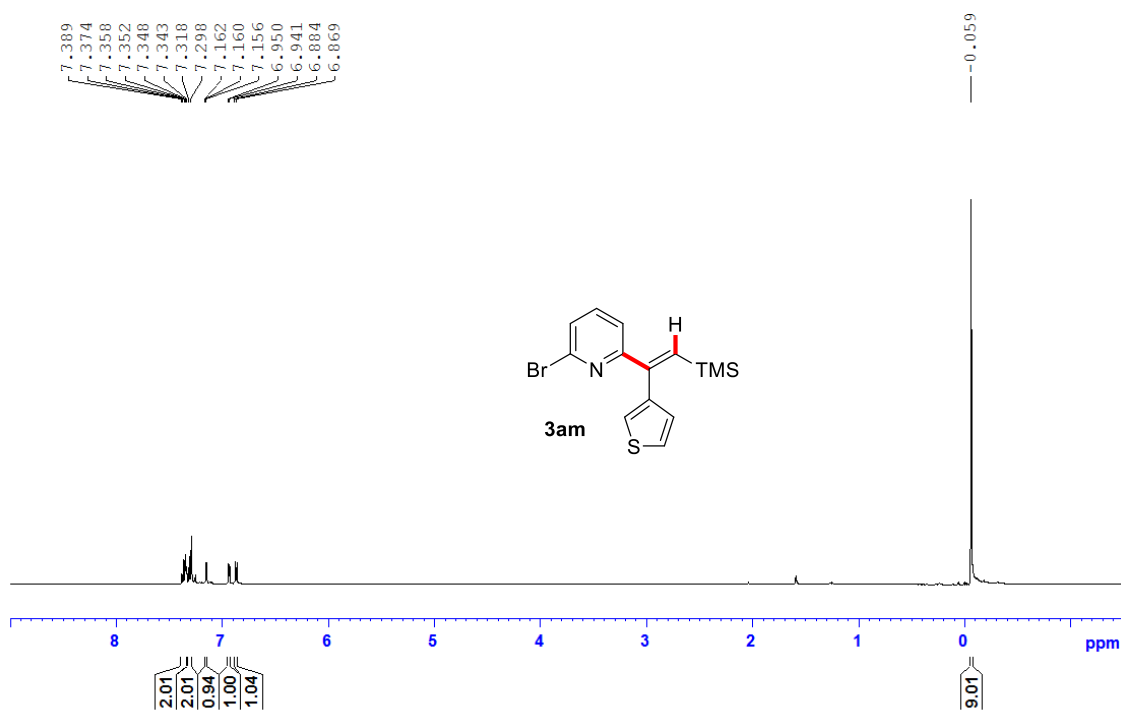

zw-84-54-1c

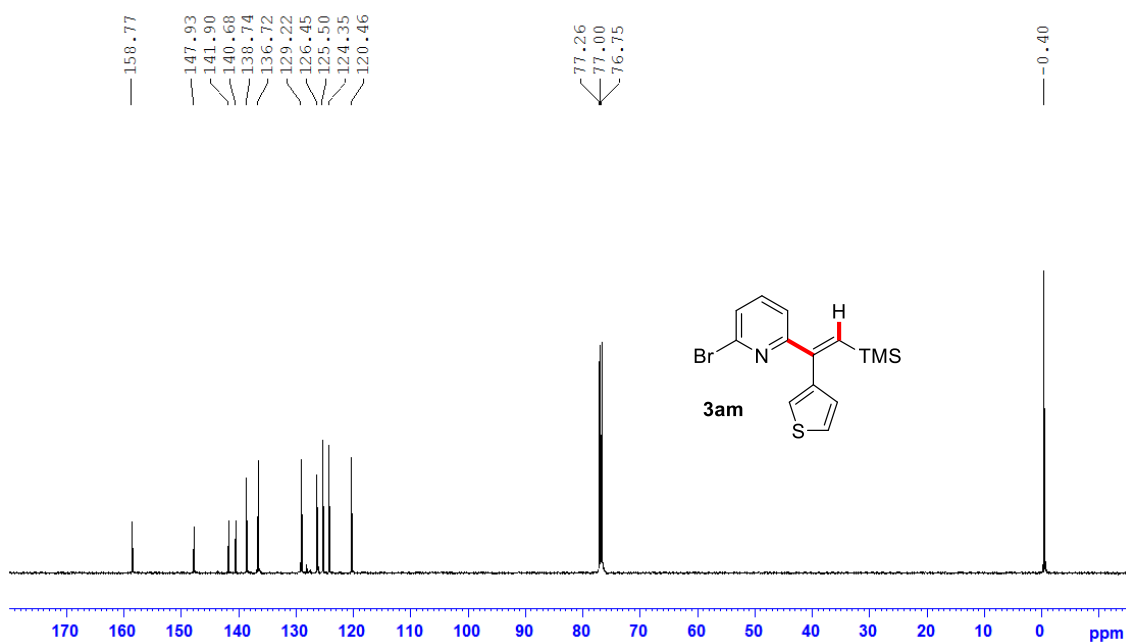

zw-84-58-3s

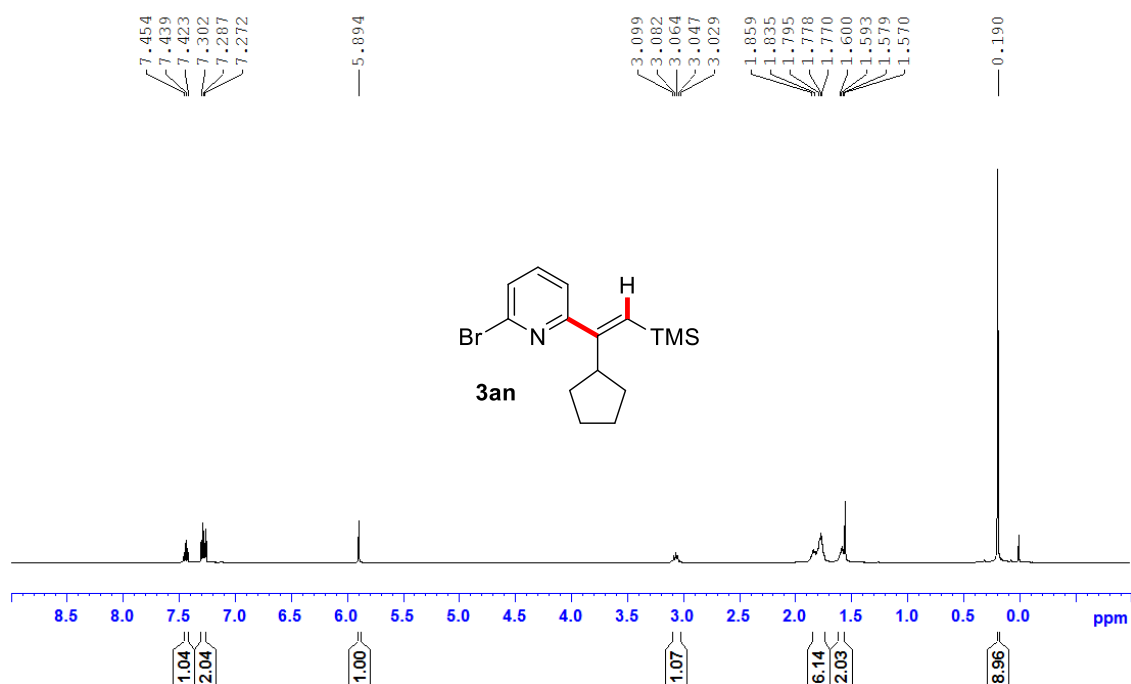

zw-84-58-3cs

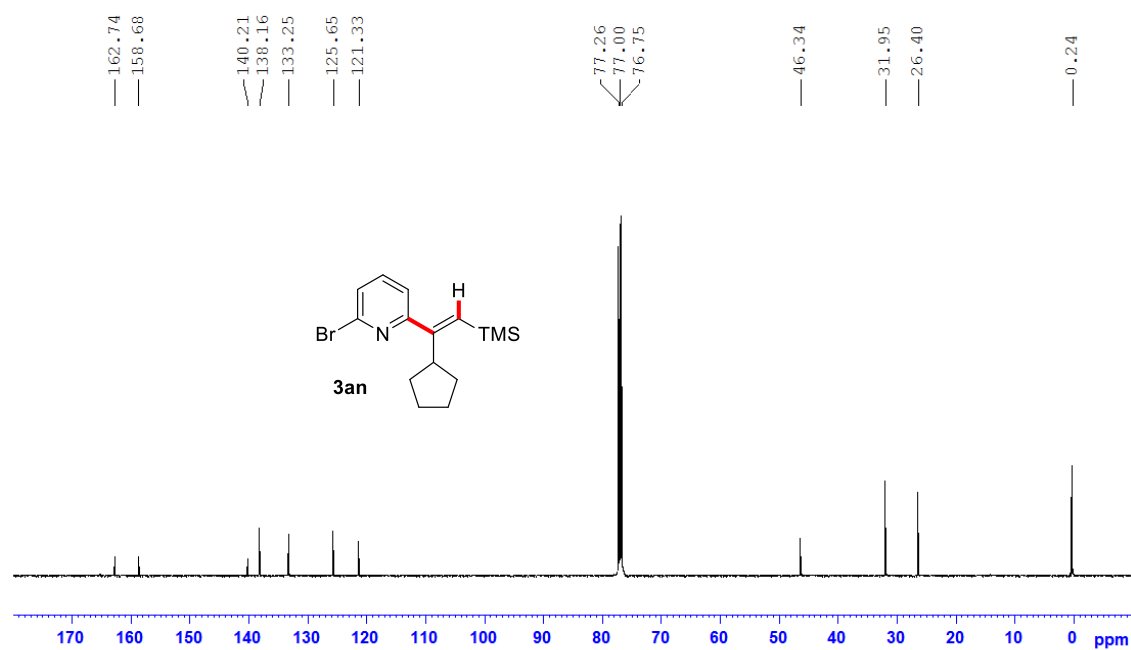

zw-84-58-4

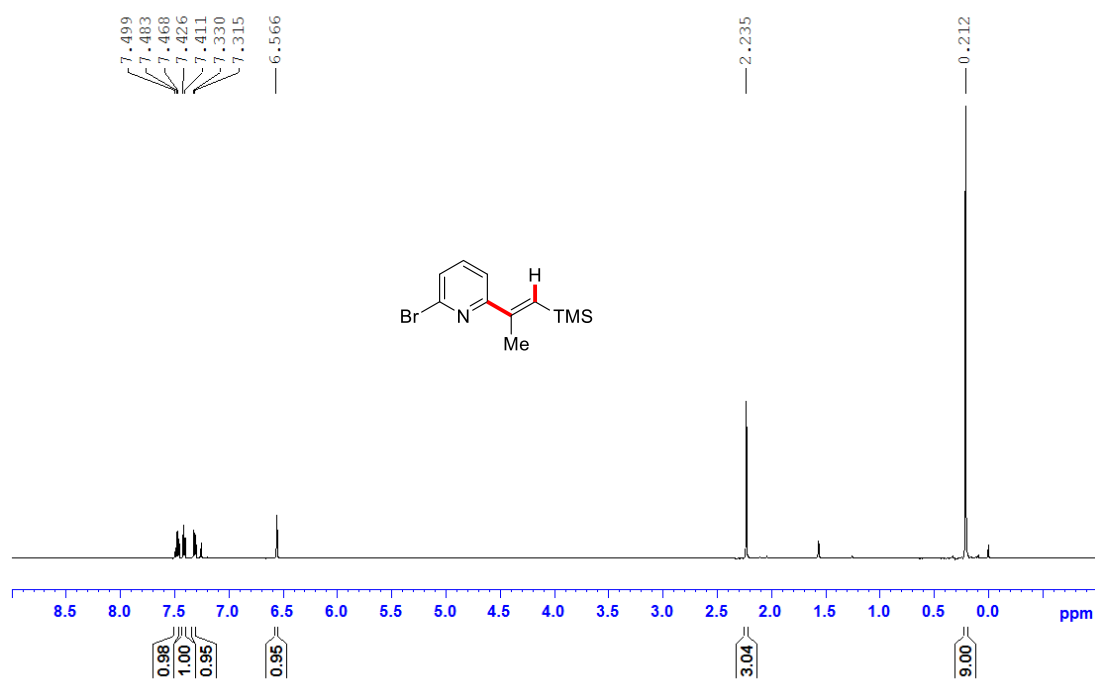

zw-84-58-4c

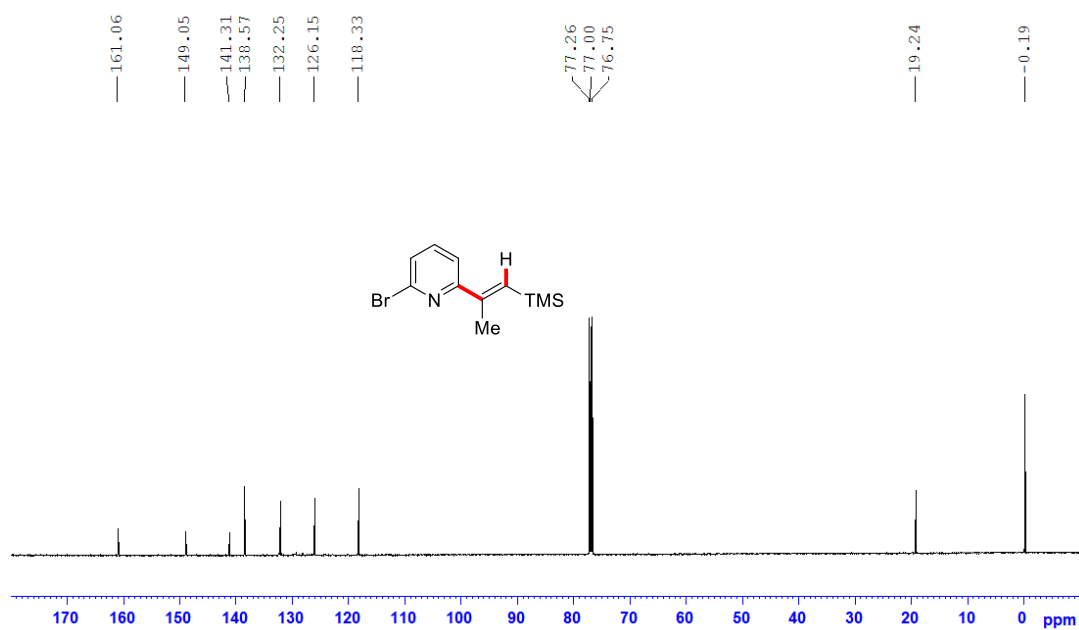

zw-84-46-1t

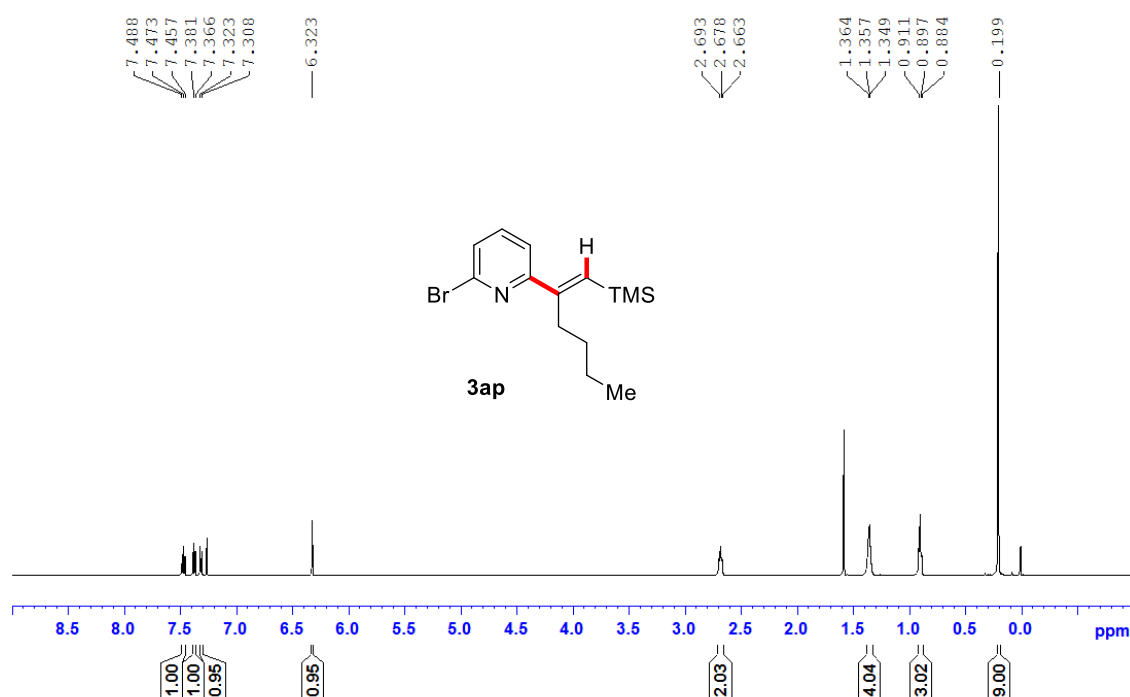

zw-84-46-1tc

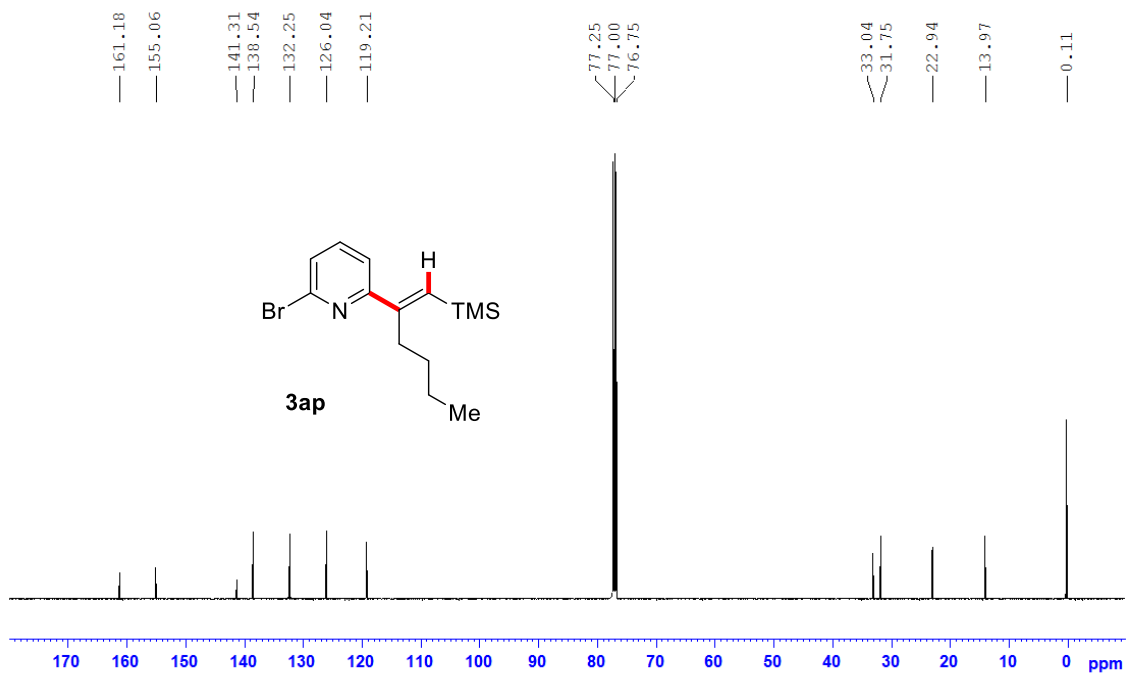

zw-84-48-2s

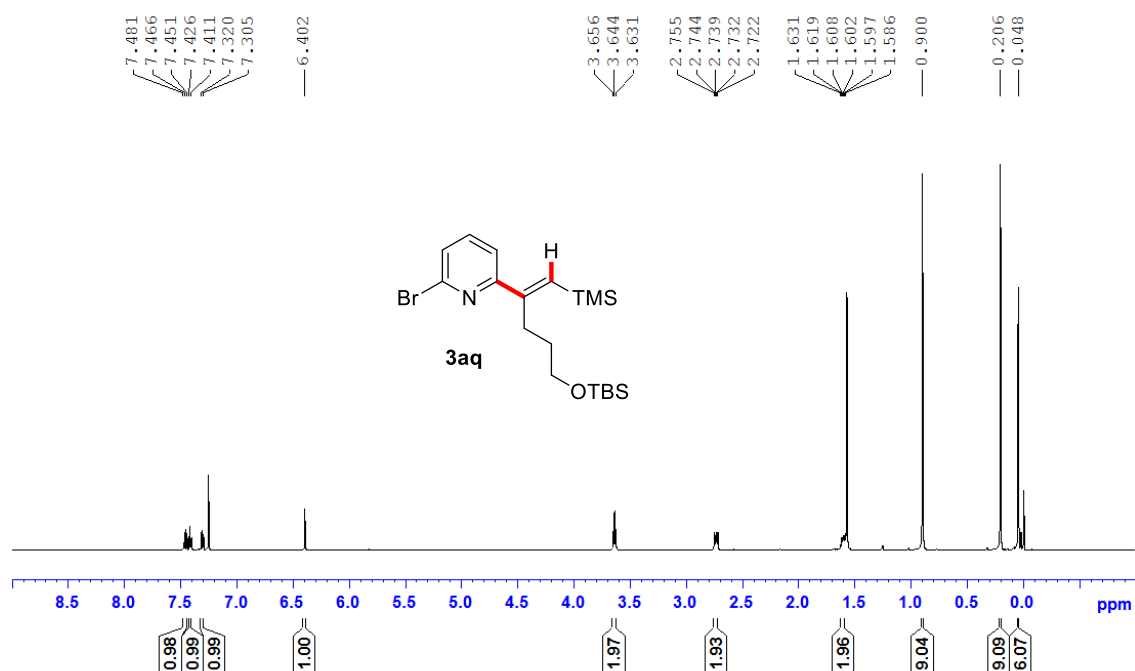

zw-84-48-2cs

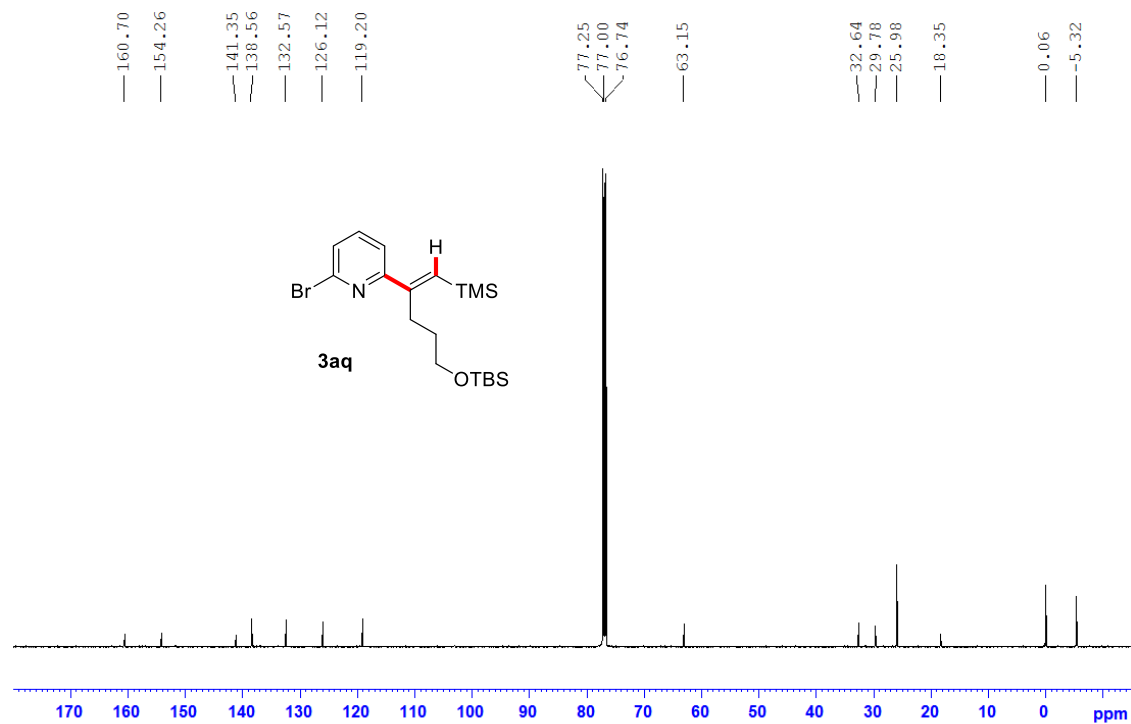

zw-84-45-3

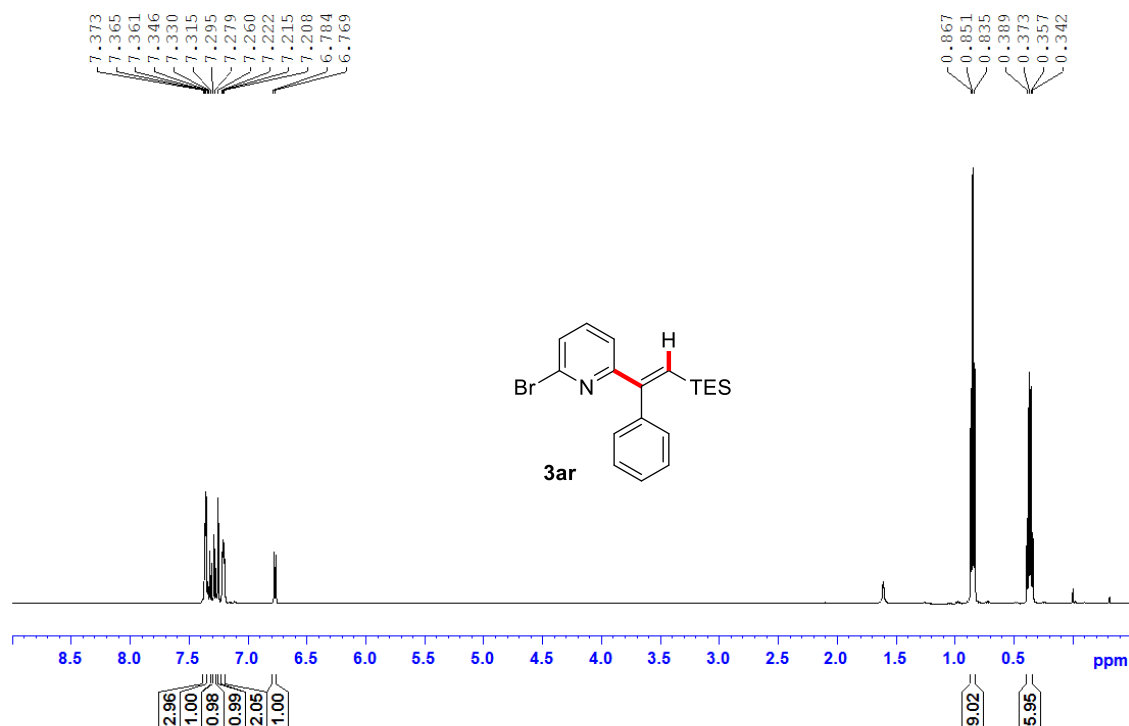

zw-84-45-3c

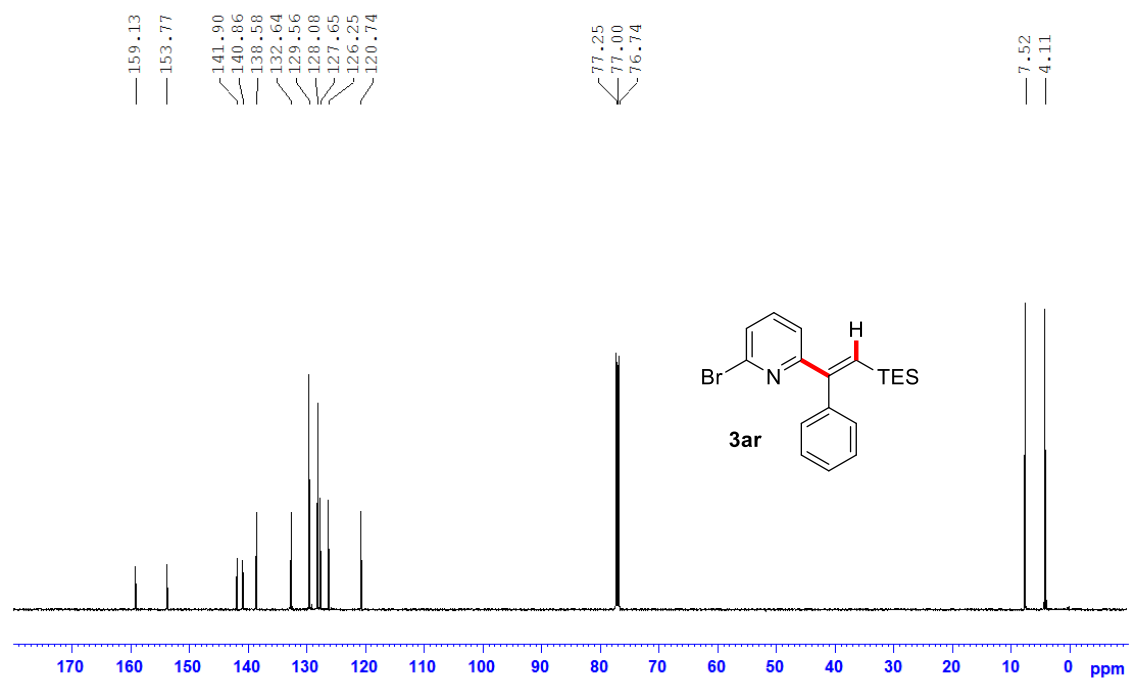

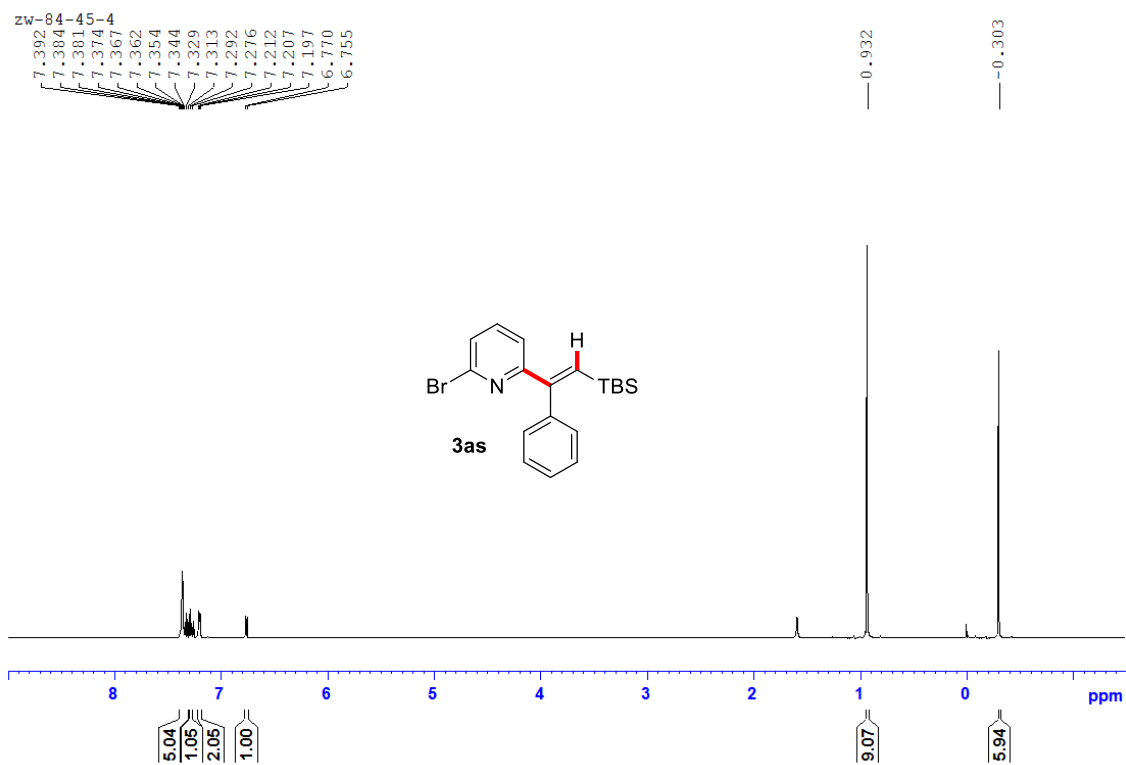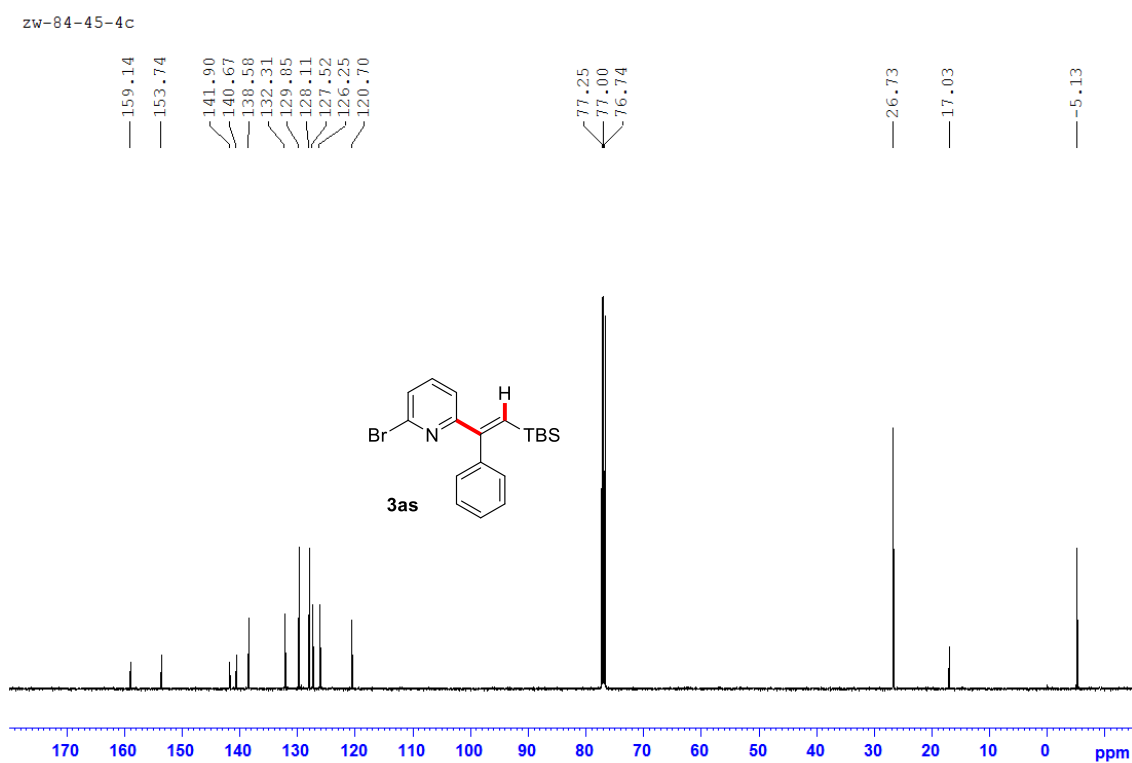

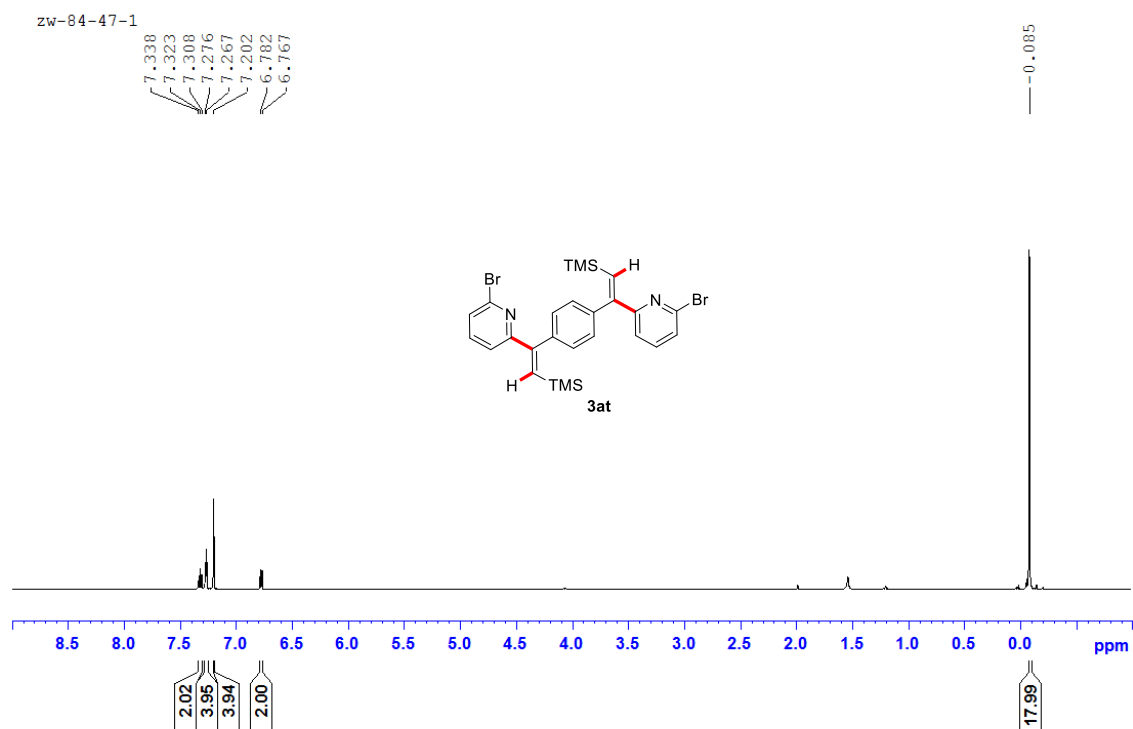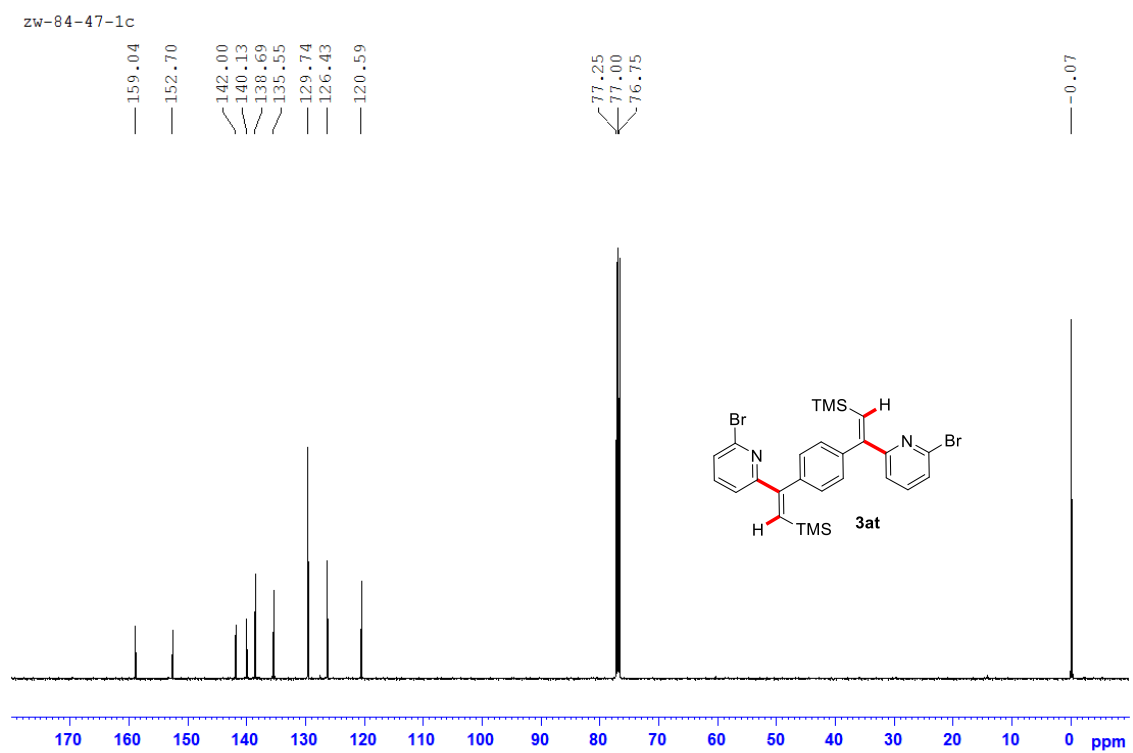

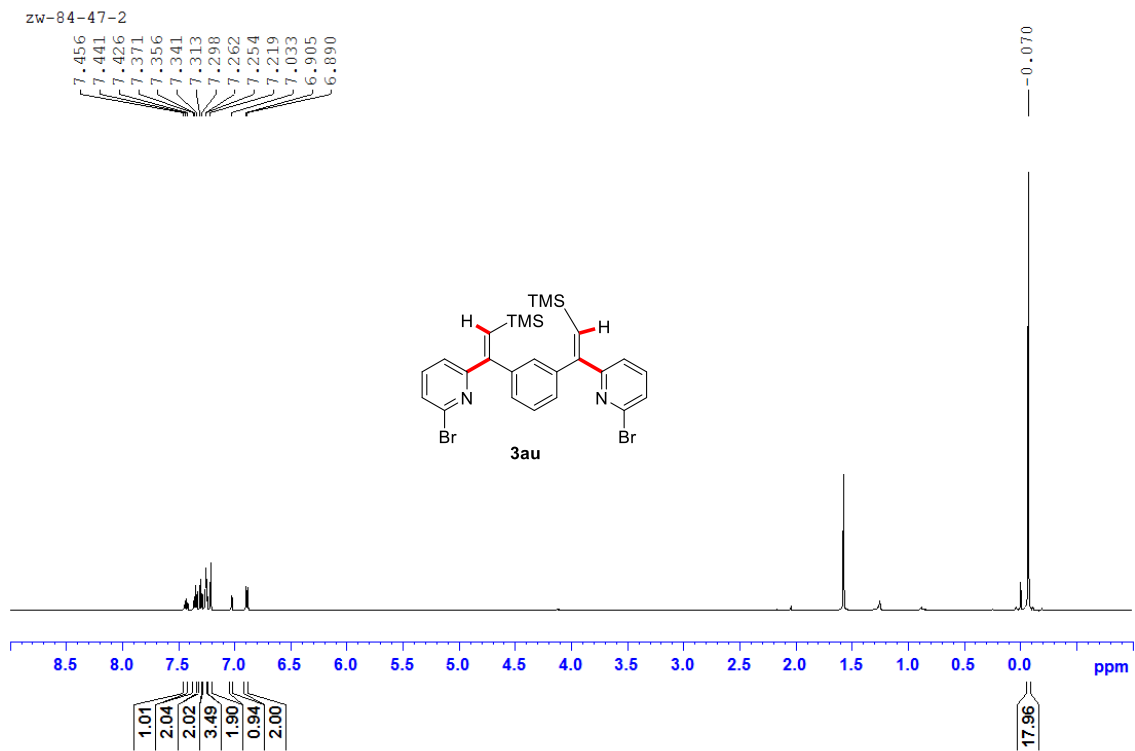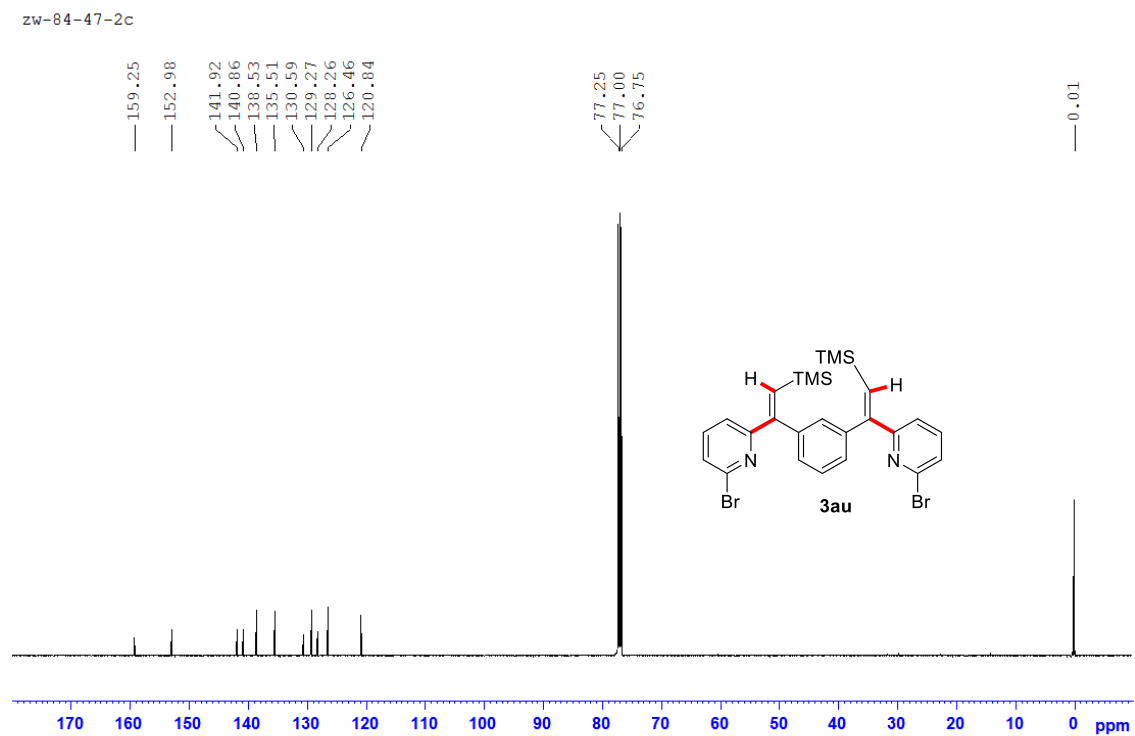

— 0.088

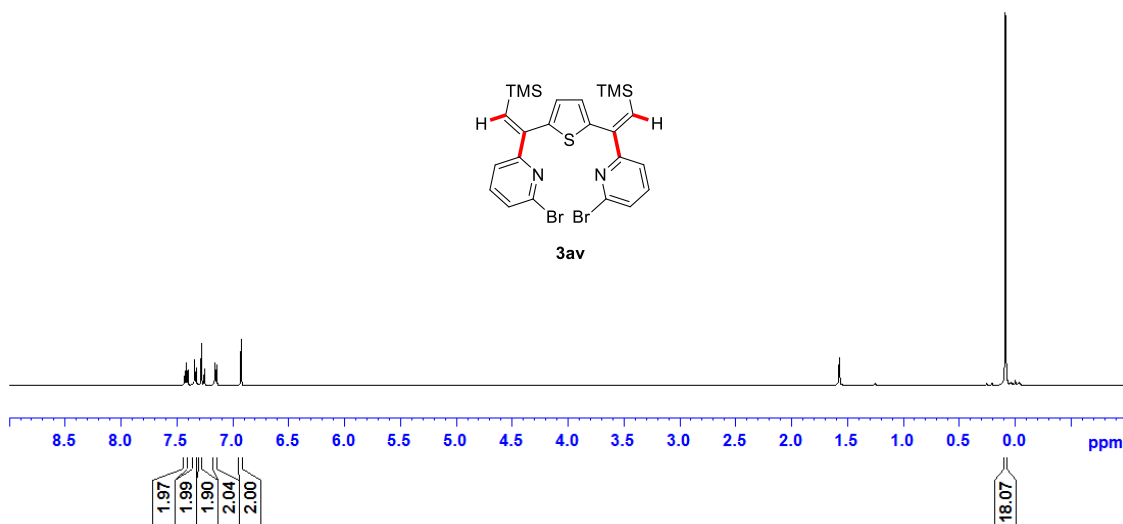

—159.22

145.45  
142.39  
141.74  
139.54  
138.70

128.05  
126.69

—120.43

77.25  
77.00  
76.74

— -0.17

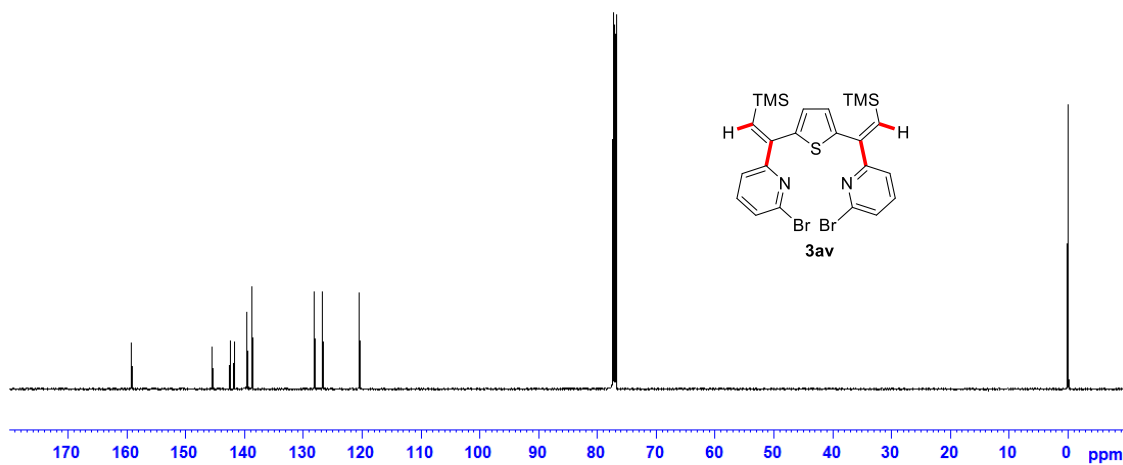

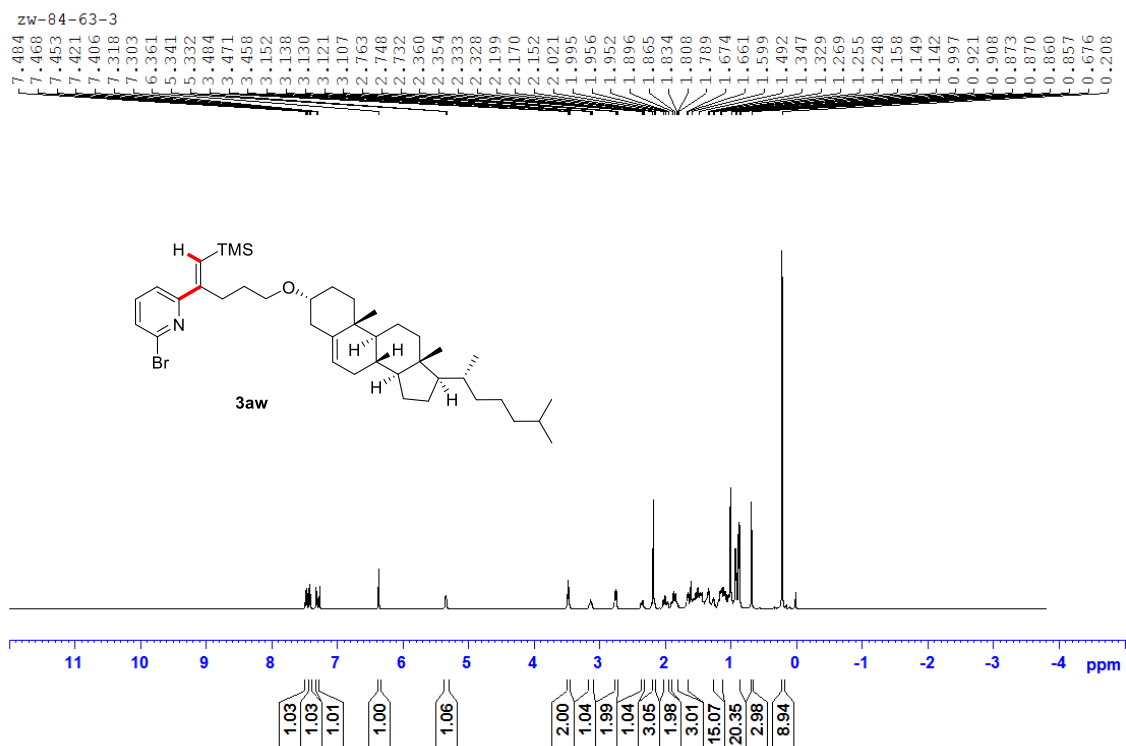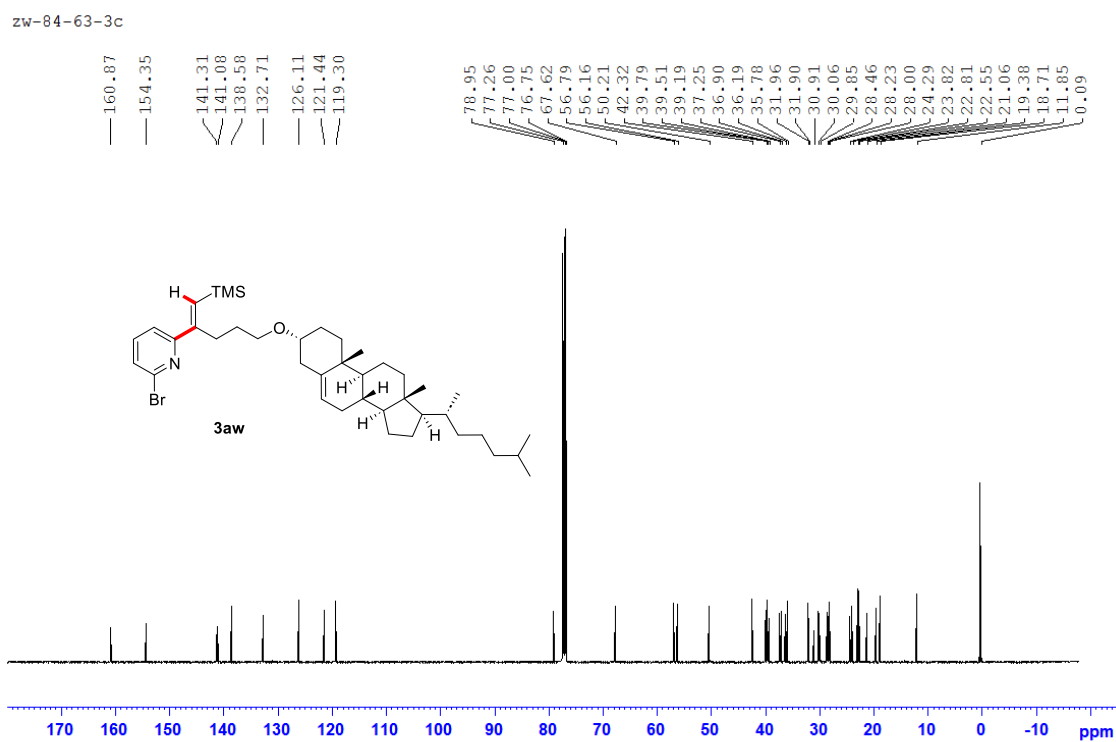

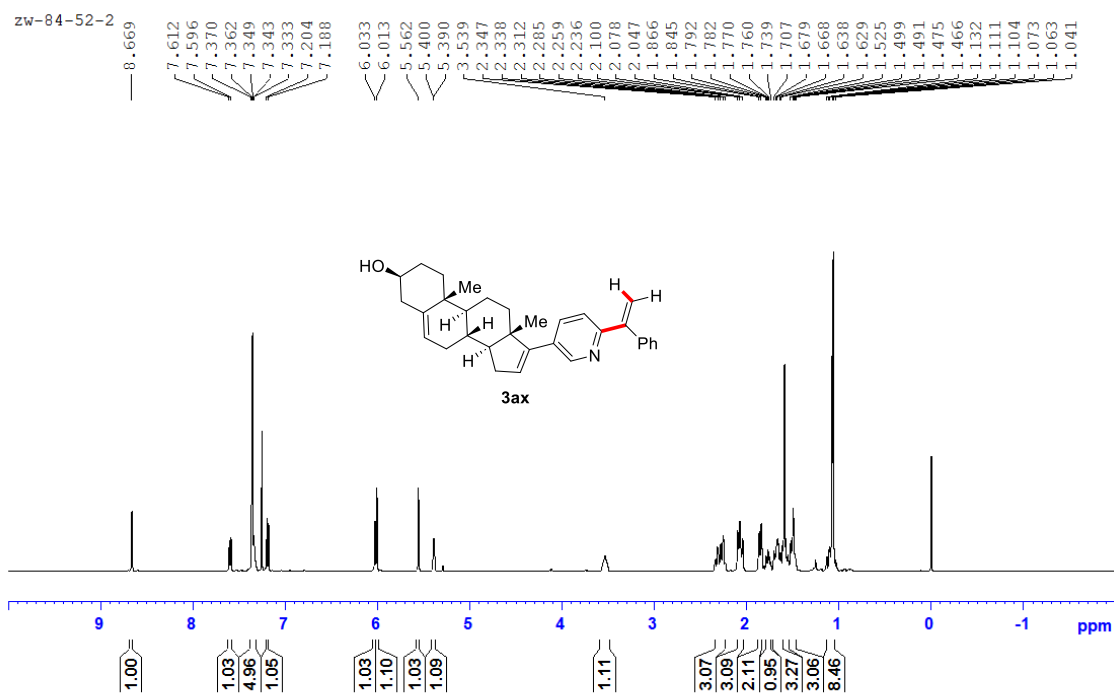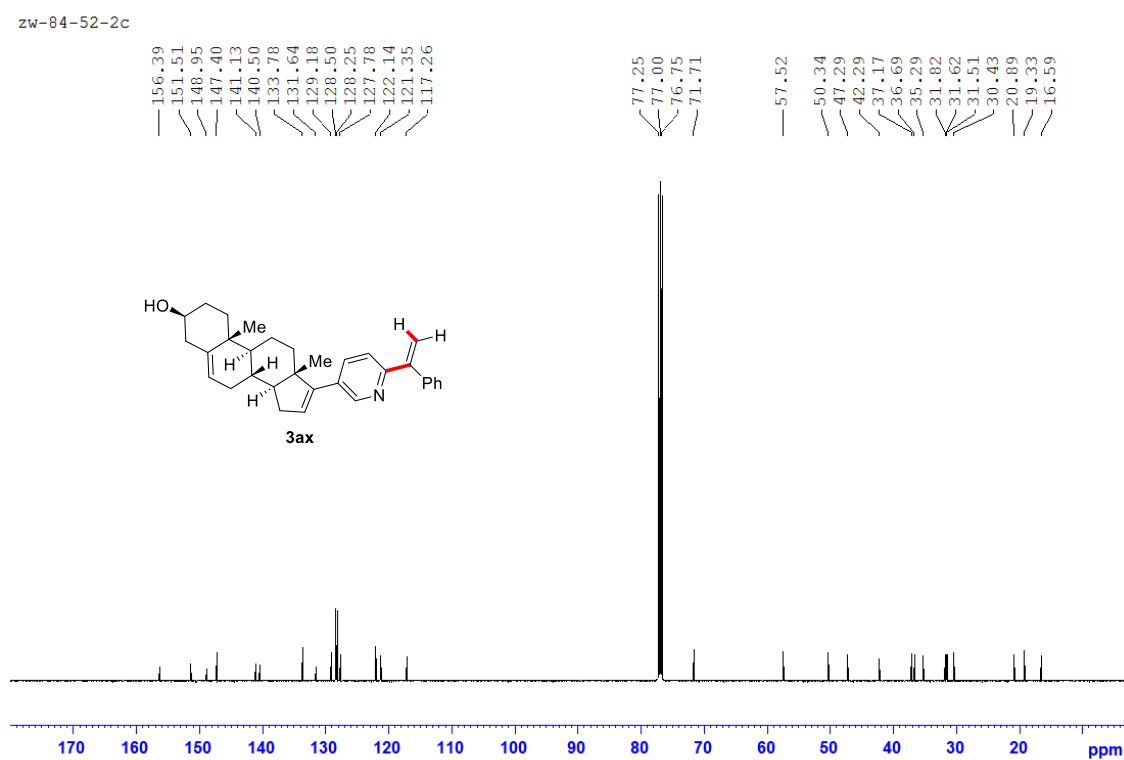

Supplement: d5cc03275j1.pdf [file d5cc03275j1.pdf]
